# Supplementary material for: Bacterial biota composition in gut regions of black soldier fly larvae reared on industrial residual streams: revealing community dynamics along its intestinal tract
Source: Front Microbiol. 2023 Dec 1;14:1276187. doi: 10.3389/fmicb.2023.1276187 (PMC10722301; doi:10.3389/fmicb.2023.1276187)
Supplement: Supplementary file 3 [file Table_1.XLSX]

## Sheet: Primer barcodes
Table S1. Primer design and sample-specific barcodes
Illumina Primer Design			Sample Barcodes
Forward	<Forward Adapter> <i5> <pad> <link> <Forward Target Specific Primer>		Sampling day	Substrate	Sampled material	Replicate number	Sample name	Index (i5)	Sequence	Index (i7)	Sequence
Reverse	<Reverse Adapter> <i7> <pad> <link> <Reverse Target Specific Primer>		4	Chicken feed	20 whole larvae	1	WLD4CF1	SB503	AGAGTCAC	SA701	CGAGAGTT
						2	WLD4CF2	SB504	TACGAGAC	SA701	CGAGAGTT
Adapter (Forward)	AATGATACGGCGACCACCGAGATCTACAC					3	WLD4CF3	SB505	ACGTCTCG	SA701	CGAGAGTT
Adapter (Reverse)	CAAGCAGAAGACGGCATACGAGAT					4	WLD4CF4	SB506	TCGACGAG	SA701	CGAGAGTT
i5 (Forward)	see sample barcodes					5	WLD4CF5	SB507	GATCGTGT	SA701	CGAGAGTT
i7 (Reverse)	see sample barcodes				Fresh substrate	1	SUBD4CF1	SB508	GTCAGATA	SA701	CGAGAGTT
pad (Forward)	TATGGTAATT					2	SUBD4CF2	SB501	CTACTATA	SA702	GACATAGT
pad (Reverse)	AGTCAGTCAG					3	SUBD4CF3	SB502	CGTTACTA	SA702	GACATAGT
link (Forward)	GT					4	SUBD4CF4	SB503	AGAGTCAC	SA702	GACATAGT
link (Reverse)	CC					5	SUBD4CF5	SB504	TACGAGAC	SA702	GACATAGT
				Swill	20 whole larvae	1	WLD4SW1	SA502	ACTATCTG	SB704	TCTCTATG
Forward primer (515F)	5' - GTG CCA GCM GCC GCG GTA A - 3'					2	WLD4SW2	SA503	TAGCGAGT	SB704	TCTCTATG
Reverse primer (806R)	5' - GGA CTA CHV GGG TWT CTA AT - 3'					3	WLD4SW3	SA504	CTGCGTGT	SB704	TCTCTATG
						4	WLD4SW4	SA505	TCATCGAG	SB704	TCTCTATG
						5	WLD4SW5	SA506	CGTGAGTG	SB704	TCTCTATG
					Fresh substrate	1	SUBD4SW1	SB505	ACGTCTCG	SA702	GACATAGT
						2	SUBD4SW2	SB506	TCGACGAG	SA702	GACATAGT
						3	SUBD4SW3	SB507	GATCGTGT	SA702	GACATAGT
						4	SUBD4SW4	SB508	GTCAGATA	SA702	GACATAGT
						5	SUBD4SW5	SB501	CTACTATA	SA703	ACGCTACT
				DDGS	20 whole larvae	1	WLD4DDGS1	SA505	TCATCGAG	SB703	TAGCAGCT
						2	WLD4DDGS2	SA506	CGTGAGTG	SB703	TAGCAGCT
						3	WLD4DDGS3	SA507	GGATATCT	SB703	TAGCAGCT
						4	WLD4DDGS4	SA508	GACACCGT	SB703	TAGCAGCT
						5	WLD4DDGS5	SA501	ATCGTACG	SB704	TCTCTATG
					Fresh substrate	1	SUBD4DDGS1	SB502	CGTTACTA	SA703	ACGCTACT
						2	SUBD4DDGS2	SB503	AGAGTCAC	SA703	ACGCTACT
						3	SUBD4DDGS3	SB504	TACGAGAC	SA703	ACGCTACT
						4	SUBD4DDGS4	SB505	ACGTCTCG	SA703	ACGCTACT
						5	SUBD4DDGS5	SB506	TCGACGAG	SA703	ACGCTACT
			at harvest	Chicken feed	10 whole larvae	1	WLD18CF1	SB507	GATCGTGT	SA703	ACGCTACT
						2	WLD18CF2	SB508	GTCAGATA	SA703	ACGCTACT
						3	WLD18CF3	SB501	CTACTATA	SA704	ACTCACTG
						4	WLD18CF4	SB502	CGTTACTA	SA704	ACTCACTG
						5	WLD18CF5	SB503	AGAGTCAC	SA704	ACTCACTG
					Anterior midgut	1	AMGD18CF1	SB506	TCGACGAG	SA705	TGAGTACG
						2	AMGD18CF2	SB507	GATCGTGT	SA705	TGAGTACG
						3	AMGD18CF3	SB508	GTCAGATA	SA705	TGAGTACG
						4	AMGD18CF4	SB501	CTACTATA	SA706	CTGCGTAG
						5	AMGD18CF5	SB502	CGTTACTA	SA706	CTGCGTAG
					Middle midgut	1	MMGD18CF1	SB507	GATCGTGT	SA707	TAGTCTCC
						2	MMGD18CF2	SB508	GTCAGATA	SA707	TAGTCTCC
						3	MMGD18CF3	SB501	CTACTATA	SA708	CGAGCGAC
						4	MMGD18CF4	SB502	CGTTACTA	SA708	CGAGCGAC
						5	MMGD18CF5	SB503	AGAGTCAC	SA708	CGAGCGAC
					Posterior midgut	1	PMGD18CF1	SB506	TCGACGAG	SA709	ACTACGAC
						2	PMGD18CF2	SB507	GATCGTGT	SA709	ACTACGAC
						3	PMGD18CF3	SB508	GTCAGATA	SA709	ACTACGAC
						4	PMGD18CF4	SB501	CTACTATA	SA710	GTCTGCTA
						5	PMGD18CF5	SB502	CGTTACTA	SA710	GTCTGCTA
					Hindgut	1	HGD18CF1	SB505	ACGTCTCG	SA711	GTCTATGA
						2	HGD18CF2	SB506	TCGACGAG	SA711	GTCTATGA
						3	HGD18CF3	SB507	GATCGTGT	SA711	GTCTATGA
						4	HGD18CF4	SB508	GTCAGATA	SA711	GTCTATGA
						5	HGD18CF5	SB501	CTACTATA	SA712	TATAGCGA
					Residue	1	RESD18CF1	SA506	CGTGAGTG	SB701	CTCGACTT
						2	RESD18CF2	SA507	GGATATCT	SB701	CTCGACTT
						3	RESD18CF3	SA508	GACACCGT	SB701	CTCGACTT
						4	RESD18CF4	SA501	ATCGTACG	SB702	CGAAGTAT
						5	RESD18CF5	SA502	ACTATCTG	SB702	CGAAGTAT
				Swill	10 whole larvae	1	WLD18SW1	SA502	ACTATCTG	SB702	CGAAGTAT
						2	WLD18SW2	SB505	ACGTCTCG	SA704	ACTCACTG
						3	WLD18SW3	SB506	TCGACGAG	SA704	ACTCACTG
						4	WLD18SW4	SB507	GATCGTGT	SA704	ACTCACTG
						5	WLD18SW5	SB508	GTCAGATA	SA704	ACTCACTG
					Anterior midgut	1	AMGD18SW1	SB503	AGAGTCAC	SA706	CTGCGTAG
						2	AMGD18SW2	SB504	TACGAGAC	SA706	CTGCGTAG
						3	AMGD18SW3	SB505	ACGTCTCG	SA706	CTGCGTAG
						4	AMGD18SW4	SB506	TCGACGAG	SA706	CTGCGTAG
						5	AMGD18SW5	SB501	CTACTATA	SA707	TAGTCTCC
					Middle midgut	1	MMGD18SW1	SB504	TACGAGAC	SA708	CGAGCGAC
						2	MMGD18SW2	SB505	ACGTCTCG	SA708	CGAGCGAC
						3	MMGD18SW3	SB506	TCGACGAG	SA708	CGAGCGAC
						4	MMGD18SW4	SB507	GATCGTGT	SA708	CGAGCGAC
						5	MMGD18SW5	SB508	GTCAGATA	SA708	CGAGCGAC
					Posterior midgut	1	PMGD18SW1	SB503	AGAGTCAC	SA710	GTCTGCTA
						2	PMGD18SW2	SB504	TACGAGAC	SA710	GTCTGCTA
						3	PMGD18SW3	SB505	ACGTCTCG	SA710	GTCTGCTA
						4	PMGD18SW4	SB506	TCGACGAG	SA710	GTCTGCTA
						5	PMGD18SW5	SB507	GATCGTGT	SA710	GTCTGCTA
					Hindgut	1	HGD18SW1	SB502	CGTTACTA	SA712	TATAGCGA
						2	HGD18SW2	SB503	AGAGTCAC	SA712	TATAGCGA
						3	HGD18SW3	SB504	TACGAGAC	SA712	TATAGCGA
						4	HGD18SW4	SB505	ACGTCTCG	SA712	TATAGCGA
						5	HGD18SW5	SB506	TCGACGAG	SA712	TATAGCGA
					Residue	1	RESD18SW1	SA503	TAGCGAGT	SB702	CGAAGTAT
						2	RESD18SW2	SA504	CTGCGTGT	SB702	CGAAGTAT
						3	RESD18SW3	SA505	TCATCGAG	SB702	CGAAGTAT
						4	RESD18SW4	SA506	CGTGAGTG	SB702	CGAAGTAT
						5	RESD18SW5	SA507	GGATATCT	SB702	CGAAGTAT
				DDGS	10 whole larvae	1	WLD18DDGS1	SB501	CTACTATA	SA705	TGAGTACG
						2	WLD18DDGS2	SB502	CGTTACTA	SA705	TGAGTACG
						3	WLD18DDGS3	SB503	AGAGTCAC	SA705	TGAGTACG
						4	WLD18DDGS4	SB504	TACGAGAC	SA705	TGAGTACG
						5	WLD18DDGS5	SB505	ACGTCTCG	SA705	TGAGTACG
					Anterior midgut	1	AMGD18DDGS1	SB502	CGTTACTA	SA707	TAGTCTCC
						2	AMGD18DDGS2	SB503	AGAGTCAC	SA707	TAGTCTCC
						3	AMGD18DDGS3	SB504	TACGAGAC	SA707	TAGTCTCC
						4	AMGD18DDGS4	SB505	ACGTCTCG	SA707	TAGTCTCC
						5	AMGD18DDGS5	SB506	TCGACGAG	SA707	TAGTCTCC
					Middle midgut	1	MMGD18DDGS1	SB501	CTACTATA	SA709	ACTACGAC
						2	MMGD18DDGS2	SB502	CGTTACTA	SA709	ACTACGAC
						3	MMGD18DDGS3	SB503	AGAGTCAC	SA709	ACTACGAC
						4	MMGD18DDGS4	SB504	TACGAGAC	SA709	ACTACGAC
						5	MMGD18DDGS5	SB505	ACGTCTCG	SA709	ACTACGAC
					Posterior midgut	1	PMGD18DDGS1	SB508	GTCAGATA	SA710	GTCTGCTA
						2	PMGD18DDGS2	SB501	CTACTATA	SA711	GTCTATGA
						3	PMGD18DDGS3	SB502	CGTTACTA	SA711	GTCTATGA
						4	PMGD18DDGS4	SB503	AGAGTCAC	SA711	GTCTATGA
						5	PMGD18DDGS5	SB504	TACGAGAC	SA711	GTCTATGA
					Hindgut	1	HGD18DDGS1	SA501	ATCGTACG	SB701	CTCGACTT
						2	HGD18DDGS2	SA502	ACTATCTG	SB701	CTCGACTT
						3	HGD18DDGS3	SA503	TAGCGAGT	SB701	CTCGACTT
						4	HGD18DDGS4	SA504	CTGCGTGT	SB701	CTCGACTT
						5	HGD18DDGS5	SA505	TCATCGAG	SB701	CTCGACTT
					Residue	1	RESD18DDGS1	SA508	GACACCGT	SB702	CGAAGTAT
						2	RESD18DDGS2	SA501	ATCGTACG	SB703	TAGCAGCT
						3	RESD18DDGS3	SA502	ACTATCTG	SB703	TAGCAGCT
						4	RESD18DDGS4	SA503	TAGCGAGT	SB703	TAGCAGCT
						5	RESD18DDGS5	SA504	CTGCGTGT	SB703	TAGCAGCT
			N.A.	N.A.	Negative PCR control	1	N1PCR5	SA507	GGATATCT	SB704	TCTCTATG
					Negative PCR control	2	N2PCR5	SA508	GACACCGT	SB704	TCTCTATG
					MOCK community	1	MOCK	SA501	ATCGTACG	SB705	GATCTACG
			N.A. = not applicable
