# Supplementary material for: Bacterial biota composition in gut regions of black soldier fly larvae reared on industrial residual streams: revealing community dynamics along its intestinal tract
Source: Front Microbiol. 2023 Dec 1;14:1276187. doi: 10.3389/fmicb.2023.1276187 (PMC10722301; doi:10.3389/fmicb.2023.1276187)
Supplement: Supplementary file 5 [file Table_3.XLSX]

## Sheet: zOTU table
Table S3. Identification1 of zOTUs (zero-radius operational taxonomic units) and distribution over the different samples investigated (after decontamination against negative controls and rarifying).
zOTU	Taxonomy (based on pipeline): family and genus (f:, g:)2	Taxonomy (based on BLAST search): family and genus (f:, g:)3	Sample names
			WLD4CF1	WLD4CF2	WLD4CF3	WLD4CF4	WLD4CF5	SUBD4CF4	SUBD4SW1	SUBD4SW2	SUBD4SW3	SUBD4SW4	SUBD4SW5	SUBD4DDGS1	SUBD4DDGS3	SUBD4DDGS4	SUBD4DDGS5	WLD18CF1	WLD18CF2	WLD18CF3	WLD18CF4	WLD18CF5	WLD18SW1	WLD18SW2	WLD18SW3	WLD18SW4	WLD18SW5	WLD18DDGS1	WLD18DDGS3	WLD18DDGS4	WLD18DDGS5	AMGD18CF1	AMGD18CF2	AMGD18CF3	AMGD18CF4	AMGD18CF5	AMGD18SW1	AMGD18SW2	AMGD18SW3	AMGD18SW4	AMGD18SW5	AMGD18DDGS1	AMGD18DDGS2	AMGD18DDGS3	AMGD18DDGS4	AMGD18DDGS5	MMGD18CF1	MMGD18CF2	MMGD18CF3
1	f:Enterococcaceae(0.8300),g:Enterococcus(0.8200)	f:Enterococcaceae,g:Enterococcus (99.6%)	103.129	0	0	599.127	494.89	94.214	0	0	0	0	0	0	27.5722	40.4887	98.0639	5394	2762.39	586.669	303.995	866.197	525.79	1173.72	309.054	2182.56	5430.99	3562.3	3483.66	3346.7	1981.53	733.666	2475	478.521	780.1	1684.03	200.22	1406.66	747.28	588.525	1045.85	334.405	528.492	291.296	334.271	230.746	586.728	928.031	273.412
2	f:Leuconostocaceae(1.0000),g:Weissella(1.0000)	f:Lactobacillaceae,g:Weissella (100%)	9320.12	9306.57	9905.97	4294.62	4685.04	90.6491	281.366	223.28	219.431	261.481	273.57	236.534	120.315	144.825	147.235	642.786	1237.53	1226.81	385.333	737.789	27.6023	33.5839	22.0753	18.826	0	622.558	227.643	135.93	450.307	298.282	42.0643	598.706	784.834	1626.6	38.1787	48.369	25.1451	22.8919	76.1105	0	0	13.1322	0	60.9456	533.553	319.517	647.211
3	f:Enterobacteriaceae(1.0000),g:Buttiauxella(0.9100)	f:Erwiniaceae,g:Erwinia (100%)	19.4799	23.9833	23.9498	0	0	363.106	351.253	335.848	338.609	299.377	303.611	348.302	99.0094	176.489	128.344	217.946	382.528	253.991	166.311	660.224	159.218	1349.39	562.919	20.0811	643.638	409.578	212.753	400.947	635.594	1036.63	97.3003	3022.95	432.658	368.947	484.374	967.38	1399.48	188.061	593.982	0	0	32.5321	23.8935	46.2796	873.086	416.75	4060.1
4	f:Lactobacillaceae(1.0000),g:Lactobacillus(1.0000)	f:Lactobacillaceae,g:Lactiplantibacillus (100%)	2197.34	2476.9	2014.87	931.018	1249.26	654.914	224.22	239.998	235.536	196.184	303.292	111.769	318.647	392.948	748.953	135.679	896.298	1701.98	651.613	972.337	765.795	655.748	265.484	211.479	128.728	1227.71	448.128	397.298	798.683	3101.86	3781.96	2762.32	1491.03	1846.9	232.278	652.829	391.32	346.856	281.024	2373.9	1363.9	1952.52	473.331	2656.19	1284.12	2119.13	1287.08
5	f:Lactobacillaceae(1.0000),g:Lactobacillus(1.0000)	f:Lactobacillaceae,g:Levilactobacillus (100%)	66.0026	68.2284	33.9091	0	0	893.25	32.0314	33.8077	27.3786	26.2355	40.9076	109.169	413.897	640.293	1299.28	52.7981	222.937	408.937	198.574	238.26	1394.25	1018.28	584.413	260.427	152.864	366.572	255.419	293.754	425.843	1101.84	1579.32	831.305	699.092	159.499	48.6706	183.133	101.366	85.1927	75.5783	537.169	1418.69	975.366	617.17	4393.3	1395.5	2015.69	1210.9
6	f:Corynebacteriaceae(1.0000),g:Corynebacterium(1.0000)	f:Corynebacteriaceae,g:Corynebacterium (100%)	0	19.4348	0	0	0	1194.23	0	0	0	0	0	2034.19	459.329	579.82	1349.28	71.2161	48.6472	253.383	88.6085	193.354	1282.16	1023.45	383.993	104.798	107.571	220.148	174.67	828.351	66.1416	530.353	286.802	213.724	342.181	200.278	0	0	0	0	0	5004.85	2914.34	1440.37	6788.87	0	23.7134	18.0961	19.0436
7	f:Enterobacteriaceae(1.0000),g:Providencia(0.9700)	f:Morganellaceae,g:Providencia (100%)	0	0	0	3518.09	2772.7	82.5009	0	0	0	0	0	30.1516	33.212	47.2369	117.232	16.8831	76.9956	24.0015	0	0	152.149	83.0987	29.0464	0	772.664	121.849	302.093	75.2632	34.4299	74.5704	28.4678	0	0	0	0	0	0	0	61.74	44.9201	24.8526	64.1688	17.2034	22.8139	110.303	126.402	29.6537
8	f:Actinomycetaceae(0.6400),g:Actinomyces(0.6300)	f:Actinomycetaceae,g:Scrofimicrobium (98.008%)	81.1283	0	0	0	0	0	0	0	0	0	0	17.6751	0	0	0	1786.85	1141.63	125.78	36.8066	238.631	0	0	29.6273	27.6115	286.657	46.0775	0	83.0175	0	934.638	1694.89	484.905	649.908	252.882	0	0	0	0	131.996	0	0	0	53.7605	0	1219.81	1504.4	194.245
9	f:Lactobacillaceae(1.0000),g:Lactobacillus(1.0000)	f:Lactobacillaceae,g:Companilactobacillus (100%)	0	0	0	1712.08	1463.72	861.676	0	0	0	0	0	57.184	448.049	596.43	1271.78	145.502	382.878	1164.22	382.607	561.135	1259.61	893.85	509.474	138.058	112.637	763.863	941.784	471.193	1199.16	844.686	719.342	303.1	944.747	1203.84	0	52.9321	25.6689	33.0339	0	1263.38	1824.12	2573.32	1158.12	3459.89	224.559	361.381	125.416
10	f:Corynebacteriaceae(1.0000),g:Corynebacterium(1.0000)	f:Corynebacteriaceae,g:Corynebacterium (100%)	0	25.8441	0	0	0	1524.23	22.9315	0	0	13.7008	0	480.346	878.239	1105.39	1771.54	48.5006	26.2485	272.523	139.047	178.88	1326.59	1028.62	383.412	219.009	143.031	180.214	488.502	387.263	93.7761	108.679	0	33.3077	801.141	142.608	0	0	0	0	0	1770.91	3471.88	3507.2	1101.25	0	18.324	0	0
11	f:Orbaceae(0.7300),g:Gilliamella(0.4000)	f:Orbaceae,g:Gilliamella (94.821%)	0	0	0	0	0	39.7226	0	0	0	0	0	0	0	0	0	0	0	0	0	0	0	0	0	0	1111.47	0	0	17.3333	0	0	0	0	0	0	0	55.67	0	0	343.296	0	0	0	0	0	0	0	0
12	f:Lactobacillaceae(1.0000),g:Lactobacillus(1.0000)	f:Lactobacillaceae,g:Lentilactobacillus (100%)	0	0	0	0	0	371.254	29.4834	33.0647	26.5733	24.195	40.9076	0	146.634	204.001	166.681	0	0	0	0	0	181.098	125.725	126.642	682.13	248.814	0	0	0	0	0	0	0	0	0	2336.77	2401.11	2799.48	3626.77	250.686	0	0	0	0	0	0	0	0
13	f:Oxalobacteraceae(1.0000),g:Massilia(0.9800)	f:Oxalobacteraceae,g:Massilia (100%)	30.4804	31.2197	43.3942	17.6948	22.1966	828.574	0	0	0	0	0	2749.51	787.689	1205.58	1068.98	1737.73	1469.57	751.338	1467.27	1946.9	2470.74	2117.94	7401.6	4135.45	1462.19	1398.71	2730	1968.25	2535.58	0	33.1416	0	0	18.3387	684.303	283.826	566.026	315.561	939.406	0	0	0	0	59.9679	0	0	0
14	f:Enterobacteriaceae(1.0000),g:Morganella(1.0000)	f:Morganellaceae,g:Morganella (100%)	0	0	0	0	0	81.4824	0	0	0	0	0	0	34.152	57.0995	94.7303	0	0	37.0656	0	28.9474	64.9663	94.2934	0	0	766.108	258.034	331.872	1214.25	274.986	14.0447	0	0	47.0795	18.0974	0	159.1	0	0	167.124	61.1412	41.92	61.7811	82.1938	195.222	21.917	28.0894	15.2349
15	f:Bifidobacteriaceae(1.0000),g:Bifidobacterium(1.0000)	f:Bifidobacteriaceae,g:Bifidobacterium (100%)	0	0	0	0	0	122.733	0	0	0	0	0	46.7869	133.161	31.6643	41.1146	464.746	701.71	1319.47	369.429	718.49	0	19.8059	34.2747	65.8911	0	383.979	260.859	172.877	361.061	585.863	733.789	1342.58	1498.92	1744.11	0	0	0	0	0	0	0	0	0	0	2510.03	1569.23	2315.43
16	f:Lactobacillaceae(1.0000),g:Lactobacillus(0.9900)	f:Lactobacillaceae,g:Limosilactobacillus (100%)	0	0	0	0	0	217.456	0	0	0	0	0	24.953	80.5235	137.817	129.733	0	0	0	15.9041	0	120.171	222.171	99.9196	682.13	176.405	0	0	0	0	0	0	0	0	0	1801.39	2471.38	2189.72	2715.73	265.589	0	0	0	0	0	0	0	0
17	f:Clostridiaceae(0.4600),g:Clostridium(0.2700)	f:Lachnospiraceae,g:Novisyntrophococcus (100%)	27.0428	0	0	0	0	0	0	0	0	0	0	0	0	0	0	580.472	315.682	64.1053	20.9025	124.697	0	17.2225	0	0	0	268.273	553.789	123.614	244.18	145.797	44.1888	50.7943	83.9015	42.71	0	0	0	0	0	0	0	0	0	0	25.8692	14.5849	0
18	f:Lactobacillaceae(1.0000),g:Lactobacillus(1.0000)	f:Lactobacillaceae,g:Lactobacillus (99.6%)	0	0	0	0	0	375.328	13.1037	14.1175	0	0	19.8146	101.891	131.908	205.299	158.625	0	0	13.6717	0	0	142.387	138.641	205.067	258.544	334.036	0	0	0	0	0	0	0	0	0	1041.61	91.8706	115.772	134.744	227.799	0	0	0	0	0	0	0	0
19	f:Acetobacteraceae(1.0000),g:Acetobacter(1.0000)	f:Acetobacteraceae,g:Acetobacter (100%)	111.609	99.2414	101.016	60.5706	53.772	0	0	0	0	0	0	15.5956	0	0	0	0	0	0	0	0	0	0	96.434	18.1985	0	0	0	0	16.7619	0	29.7424	0	0	0	1537.93	686.596	818.524	862.938	2648.97	0	15.8697	0	0	72.0267	0	0	0
20	f:Acetobacteraceae(1.0000),g:Acetobacter(1.0000)	f:Acetobacteraceae,g:Acetobacter (100%)	21.0842	20.2618	17.5474	803.752	893.803	62.6396	0	0	0	0	0	0	19.1126	28.8093	23.6131	0	43.3975	943.654	221.294	431.985	56.551	0	33.1129	16.9434	0	246.771	163.789	88.9474	258.677	61.529	265.558	19.4295	678.576	1483.27	296.104	105.864	214.519	172.993	402.907	0	0	0	0	0	35.2109	473.739	42.168
21	f:Enterobacteriaceae(1.0000),g:Cosenzaea(1.0000)	f:Morganellaceae,g:Proteus (100%)	0	0	0	0	0	40.7412	0	0	0	0	0	0	182.353	187.909	40.8368	0	0	141.578	60.8899	151.417	13.1279	20.2365	0	0	0	91.1311	49.5374	33.7544	20.3861	109.348	0	65.2276	424.505	35.7123	0	0	0	0	69.7236	0	0	0	1372.92	0	478.94	217.963	227.163
22	f:Leuconostocaceae(1.0000),g:Leuconostoc(1.0000)	f:Lactobacillaceae,g:Leuconostoc (100%)	0	0	0	0	0	426.764	3393.14	3226.97	3326.1	3750.52	3254.39	21.8339	119.689	171.818	126.122	0	0	19.4442	0	0	142.724	93.8628	0	13.1782	35.4597	13.3113	13.1718	0	0	0	0	0	0	0	0	0	0	0	0	0	0	0	0	0	0	0	0
23	f:Acetobacteraceae(1.0000),g:Acetobacter(1.0000)	f:Acetobacteraceae,g:Acetobacter (100%)	14.8964	13.6457	13.5162	0	0	154.307	0	0	0	0	0	19.7545	45.1182	65.1453	40.8368	0	0	0	0	0	38.7105	67.1679	34.2747	0	24.7324	0	0	0	0	0	0	0	0	0	200.803	84.5697	173.658	126.34	405.568	0	0	0	0	0	0	0	0
24	f:Lactobacillaceae(1.0000),g:Lactobacillus(1.0000)	f:Lactobacillaceae,g:Lapidilactobacillus (100%)	0	0	0	0	0	212.873	0	0	0	0	0	74.859	195.199	135.482	220.297	353.625	567.667	351.819	124.506	196.694	168.98	117.544	116.186	87.2273	50.9547	169.975	122.269	78.4561	150.857	87.2775	23.794	192.074	87.5837	17.1323	0	0	0	0	0	0	0	0	0	0	1200.04	885.357	1136.09
25	f:Lactobacillaceae(1.0000),g:Lactobacillus(1.0000)	f:Lactobacillaceae,g:Latilactobacillus (100%)	278.449	199.517	189.464	656.068	800.014	136.483	1097.44	1228.97	1370.94	1166.32	2030.36	85.776	70.8105	95.5119	66.1168	0	15.7491	14.5832	47.2579	61.6061	46.4526	43.9175	102.243	0	25.9243	36.862	0	41.5088	34.8829	21.4014	20.8197	64.6725	0	0	0	0	0	0	15.435	0	0	0	0	0	0	0	0
26	f:Lactobacillaceae(1.0000),g:Lactobacillus(1.0000)	f:Lactobacillaceae,g:Lactiplantibacillus (99.6%)	99.4623	160.854	152.947	164.244	229.469	149.724	0	0	0	0	0	30.6714	52.0113	66.7026	136.678	30.3896	89.9448	326.299	128.596	181.849	109.399	118.405	51.1216	33.8869	21.4546	176.118	72.1586	42.8772	106.008	371.849	320.369	363.054	190.685	401.522	0	0	0	0	0	374.958	236.249	256.675	87.2114	566.762	242.165	311.955	207.304
27	f:Lactobacillaceae(1.0000),g:Lactobacillus(1.0000)	f:Lactobacillaceae,g:Secundilactobacillus (100%)	0	0	0	0	0	33.6115	0	0	0	0	0	0	0	21.023	15.8347	0	0	0	0	0	16.1574	41.7646	0	79.0693	53.6365	0	0	0	0	0	0	0	0	0	400.148	896.195	661.63	440.742	100.061	0	0	0	0	0	0	0	0
28	f:Enterococcaceae(0.9400),g:Enterococcus(0.9100)	f:Enterococcaceae,g:Enterococcus (100%)	18.3341	0	0	0	0	40.7412	109.198	153.435	108.306	76.3746	122.723	78.498	35.0919	48.0155	62.5053	357.922	270.884	66.8396	31.8082	79.791	24.2361	443.48	62.1593	2271.05	0	156.664	278.612	154.632	143.609	109.013	93.9012	85.4898	114.674	83.9722	0	39.8512	0	17.9658	45.2405	0	43.7166	46.2612	102.264	22.8139	39.1631	52.9378	36.9991
29	f:Lactobacillaceae(1.0000),g:Lactobacillus(1.0000)	f:Lactobacillaceae,g:Limosilactobacillus (100%)	0	0	0	0	0	14.7687	0	0	0	0	0	0	0	0	0	0	0	0	0	0	0	40.9035	0	48.9477	151.076	0	0	0	0	0	0	0	0	0	670.313	528.713	686.513	906.404	229.928	0	0	0	0	0	0	0	0
30	f:Brevibacteriaceae(0.9900),g:Brevibacterium(0.9900)	f:Brevibacteriaceae,g:Brevibacterium (97.2%)	0	0	0	0	0	75.3712	0	0	0	0	0	30.6714	707.792	78.382	222.519	81.6529	13.9992	203.861	46.8035	186.674	48.4723	71.4735	0	24.4738	14.0051	68.6043	65.5727	24.6316	78.8263	989.145	37.8154	103.531	1042.33	451.712	0	0	0	0	0	130.081	158.398	289.506	48.7428	0	118.567	0	26.389
31	f:Lactobacillaceae(1.0000),g:Lactobacillus(1.0000)	f:Lactobacillaceae,g:Paucilactobacillus (100%)	0	0	0	0	0	130.372	13.8317	15.2321	22.9497	13.4093	20.4538	47.8266	86.4766	60.7331	93.0635	76.1275	164.491	298.044	129.505	288.732	170.663	145.1	58.6737	25.1014	19.0708	265.202	185.837	122.246	307.151	488.219	104.523	46.9084	207.518	155.879	47.2134	25.5534	28.5501	24.9203	119.222	0	20.6606	58.1996	0	128.084	1025.43	325.729	91.4094
32	f:Lactobacillaceae(0.9900),g:Lactobacillus(0.9900)	f:Lactobacillaceae,g:Ligilactobacillus (100%)	0	0	0	0	40.329	134.446	0	0	0	0	0	66.0215	82.0901	94.7333	251.966	17.1901	39.8977	428.685	129.05	381.512	227.887	167.92	38.9222	31.3767	0	296.944	117.401	99.4386	149.951	289.587	61.1845	24.4257	632.286	246.608	0	0	0	0	0	0	0	28.0552	42.0526	0	167.791	113.438	18.4995
33	f:Bacillaceae(1.0000),g:Bacillus(1.0000)	f:Bacillaceae,g:Bacillus (100%)	38.5015	37.2155	35.8061	20.1902	25.9481	22.4076	23.6595	24.8914	24.9628	0	17.2579	85.2561	25.6923	25.6948	16.3903	23.3294	15.0491	0	0	37.8543	40.057	59.8483	214.943	151.863	42.6112	48.1254	60.9912	37.4035	104.196	0	15.2961	0	0	0	520.804	254.926	312.218	298.464	1087.9	0	0	0	0	22.8139	0	0	0
34	f:Lactobacillaceae(1.0000),g:Lactobacillus(1.0000)	f:Lactobacillaceae,g:Schleiferilactobacillus (100%)	0	0	0	0	0	51.945	0	0	0	0	0	0	17.546	24.9161	75.2842	0	0	200.823	49.5299	43.4212	87.1828	68.8901	22.6562	0	0	134.137	46.9604	0	96.0413	25.4141	13.5965	26.6462	159.387	97.2436	0	0	0	0	0	267.961	263.797	199.968	81.477	107.551	19.4019	0	23.3965
35	f:Lactobacillaceae(0.9800),g:Lactobacillus(0.9600)	f:Lactobacillaceae,g:Lapidilactobacillus (100%)	0	0	0	0	0	153.289	0	0	0	0	0	17.6751	84.91	89.0233	230.02	0	15.7491	87.4991	29.0818	35.2565	375.997	236.81	85.9773	46.4375	14.899	67.5803	37.7974	49.2632	73.39	68.5513	20.3948	0	0	13.5128	0	0	0	0	0	68.316	76.6538	313.382	155.547	291.692	80.8413	50.777	0
36	f:Lactobacillaceae(1.0000),g:Pediococcus(0.9600)	f:Lactobacillaceae,g:Pediococcus (100%)	102.9	127.98	137.059	51.0427	70.0286	65.1859	49.503	47.9252	49.523	52.4711	71.908	319.191	45.1182	57.359	83.6183	0	24.8486	16.4061	26.3553	26.7207	80.7872	96.0156	54.6072	42.0448	0	18.431	40.9471	25.0877	74.7491	43.1372	25.4935	76.3302	42.6083	25.3364	0	39.2428	19.9065	0	0	491.625	349.134	401.428	124.724	135.906	16.1683	29.9801	65.5645
37	f:Lactobacillaceae(1.0000),g:Lactobacillus(1.0000)	f:Lactobacillaceae,g:Loigolactobacillus (100%)	0	0	0	0	0	103.381	0	0	0	0	0	13.5162	49.5047	63.5881	160.569	0	53.5469	82.6381	50.4387	39.71	237.649	126.155	61.5783	0	0	68.6043	78.1718	47.4386	48.4737	29.0925	65.0085	19.1519	46.8165	13.9954	0	0	0	0	0	40.8648	23.3554	82.6733	24.6104	33.8949	32.3365	116.949	28.2934
38	f:Leuconostocaceae(1.0000),g:Leuconostoc(1.0000)	f:Lactobacillaceae,g:Leuconostoc (100%)	0	0	0	0	0	139.029	1168.78	1041.35	1143.46	1304.2	1123.04	0	39.4784	66.7026	53.0601	0	0	0	0	0	40.7302	30.57	0	0	0	0	0	0	0	0	0	0	0	0	0	0	0	0	0	0	0	0	0	0	0	0	0
39	f:Enterobacteriaceae(1.0000),g:Morganella(1.0000)	f:Morganellaceae,g:Morganella (99.6%)	0	0	0	0	0	14.2594	0	0	0	0	0	0	0	0	16.1125	0	0	0	0	0	15.4842	0	0	23.8463	131.111	23.5507	107.093	194.772	53.91	0	0	0	0	0	0	21.9029	0	0	34.5957	0	0	13.7291	15.0529	35.8504	0	0	0
40	f:Lactobacillaceae(1.0000),g:Pediococcus(0.9900)	f:Lactobacillaceae,g:Pediococcus (100%)	246.593	182.356	155.081	43.1027	41.2669	0	70.9786	78.0178	58.7834	56.2607	104.826	54.0649	16.606	18.4276	19.4461	0	0	0	0	30.803	0	0	0	0	0	0	0	0	42.5843	0	0	13.8782	0	0	0	13.3851	0	0	22.8864	0	0	23.2798	0	0	0	0	0
41	f:Enterobacteriaceae(0.9900),g:Rahnella(0.7600)	f:Yersiniaceae,g:Yersinia (100%)	0	0	0	0	0	16.8057	127.397	137.088	131.659	111.938	115.372	0	0	0	0	0	0	0	0	0	0	20.667	0	0	0	0	0	0	0	0	0	0	0	0	0	16.4272	0	31.8748	0	0	0	0	0	0	0	0	0
42	f:Leuconostocaceae(1.0000),g:Leuconostoc(1.0000)	f:Lactobacillaceae,g:Leuconostoc (100%)	0	0	0	0	0	135.464	1002.8	960.734	902.286	1019.69	761.905	0	38.2252	41.0078	28.058	0	0	0	0	0	24.2361	26.6949	0	22.5912	16.091	0	18.8987	0	0	0	0	0	0	0	16.3207	0	13.8822	16.2272	28.2088	0	0	0	0	0	0	0	0
43	f:Sphingobacteriaceae(1.0000),g:Sphingobacterium(1.0000)	f:Sphingobacteriaceae,g:Sphingobacterium (100%)	0	0	0	0	0	0	0	0	0	0	0	46.267	26.9456	149.756	15.2791	19.9528	0	217.229	54.9827	162.922	0	0	0	0	0	25.5986	56.4097	0	51.6448	68.2169	0	675.869	186.214	159.016	0	0	0	0	0	0	0	0	0	0	24.0727	80.487	355.572
44	f:Moraxellaceae(1.0000),g:Acinetobacter(1.0000)	f:Moraxellaceae,g:Acinetobacter (100%)	0	0	0	0	0	43.7968	0	14.489	0	0	0	67.5811	1102.58	1035.58	66.9502	0	0	15.7985	0	38.2255	0	0	0	0	0	0	0	13.2281	31.2587	23.0734	0	55.2353	71.5398	0	0	0	0	0	0	0	0	0	0	0	15.0904	68.603	26.6611
45	f:Acetobacteraceae(1.0000),g:Acetobacter(1.0000)	f:Acetobacteraceae,g:Acetobacter (99.6%)	25.4385	20.2618	17.5474	16.1068	0	0	0	0	0	0	0	0	0	0	0	0	0	0	0	0	0	0	0	0	0	0	0	0	0	0	0	0	0	0	299.31	138.11	173.396	152.42	513.081	0	0	0	0	0	0	0	0
46	f:Pseudomonadaceae(1.0000),g:Pseudomonas(1.0000)	f:Pseudomonadaceae,g:Pseudomonas (100%)	0	0	0	0	0	78.936	792.048	855.967	806.058	785.317	735.379	0	30.7055	24.3971	13.8901	0	0	0	0	0	31.305	0	0	0	0	0	0	0	0	0	0	0	0	0	0	0	0	0	0	0	0	0	0	0	0	0	0
47	f:Enterobacteriaceae(0.9900),g:Obesumbacterium(0.5800)	f:Hafniaceae,g:Hafnia (100%)	0	0	0	0	0	0	0	13.003	0	13.9923	0	0	0	0	0	0	18.5489	0	0	53.0703	0	0	0	88.4823	0	0	0	27.3684	38.0541	0	0	0	0	0	15.1549	31.6376	0	140.249	0	0	0	0	0	0	0	0	0
49	f:Unclassified_Clostridiales(0.5700),g:Blautia(0.5700)	f:Lachnospiraceae,g:Blautia (100%)	0	0	0	0	0	79.9546	0	0	0	0	0	0	16.2927	26.733	82.2293	33.7662	128.093	0	0	0	103.677	43.9175	60.4165	0	102.803	43.0057	50.6828	1113.89	109.179	0	0	0	0	0	0	0	0	0	0	0	0	0	0	0	0	0	0
51	f:Lysobacteraceae(1.0000),g:Stenotrophomonas(1.0000)	f:Xanthomonadaceae,g:Stenotrophomonas (100%)	0	0	0	0	0	97.2696	0	0	0	0	0	0	26.6323	0	0	0	0	0	0	0	0	0	0	0	0	0	0	0	0	0	0	0	0	0	0	0	0	0	0	0	0	0	0	0	0	0	0
53	f:Bifidobacteriaceae(0.9800),g:Bifidobacterium(0.8200)	f:Bifidobacteriaceae,g:Neoscardovia (100%)	0	0	0	0	0	118.149	0	0	0	0	0	0	46.9981	59.1759	88.3409	30.3896	0	72.0045	28.173	64.5751	138.685	58.9872	30.7892	0	0	33.7902	99.9339	59.7544	20.8391	28.4237	0	23.3154	30.2466	41.7448	0	0	0	0	0	0	26.0503	22.9814	49.9375	0	58.565	25.9287	22.3083
54	f:Acetobacteraceae(1.0000),g:Asaia(0.8700)	f:Acetobacteraceae,g:Asaia (99.6%)	0	0	0	0	0	0	0	0	0	0	0	0	0	0	0	0	0	0	0	0	0	0	0	0	0	0	0	0	0	0	0	0	0	0	0	0	0	0	0	0	0	0	0	0	0	0	0
55	f:Lactobacillaceae(1.0000),g:Lactobacillus(1.0000)	f:Lactobacillaceae,g:Lentilactobacillus (100%)	0	0	0	0	0	51.945	0	0	0	0	0	0	23.4991	26.2139	15.2791	0	0	0	0	0	24.5728	15.0697	0	0	27.7122	0	0	0	0	0	0	0	0	0	144.263	255.534	224.472	342.22	65.4657	0	0	0	0	0	0	0	0
56	f:Leuconostocaceae(1.0000),g:Leuconostoc(1.0000)	f:Lactobacillaceae,g:Leuconostoc (100%)	0	0	0	0	0	62.6396	536.161	469.222	508.114	561.732	459.252	0	21.9325	24.1375	18.8905	0	0	0	0	0	30.2952	45.6397	0	0	0	0	0	0	0	0	0	0	0	0	0	0	0	0	0	0	0	0	0	0	0	0	0
57	f:Leuconostocaceae(1.0000),g:Leuconostoc(1.0000)	f:Lactobacillaceae,g:Leuconostoc (100%)	0	0	0	0	0	16.2965	179.084	145.262	158.232	160.62	162.991	0	0	0	13.3345	0	52.847	0	0	89.4402	0	0	0	0	0	26.6226	51.5419	20.9825	86.0747	0	0	0	0	0	134.937	55.9742	95.3417	69.2553	135.722	0	0	0	0	0	0	0	0
58	f:Leuconostocaceae(1.0000),g:Leuconostoc(1.0000)	f:Lactobacillaceae,g:Leuconostoc (100%)	0	0	0	0	0	45.8338	509.226	534.979	547.974	513.634	333.973	0	17.8593	19.4657	0	0	0	0	0	0	0	0	18.0088	0	0	0	0	0	0	0	0	0	0	0	0	0	0	0	0	0	0	0	0	0	0	0	0
59	f:Enterobacteriaceae(1.0000),g:Citrobacter(0.5200)	f:Enterobacteriaceae,g:Citrobacter (100%)	0	0	0	0	0	0	0	0	0	0	0	24.4332	0	0	0	18.7249	66.8461	0	0	18.5561	0	0	0	0	0	0	56.4097	0	0	55.8442	110.472	0	0	25.0951	0	0	0	0	0	0	0	0	0	0	90.9016	126.943	0
60	f:Lactobacillaceae(1.0000),g:Lactobacillus(1.0000)	f:Lactobacillaceae,g:Limosilactobacillus (99.6%)	0	0	0	0	0	0	0	0	0	0	0	0	0	0	0	0	0	0	0	0	0	23.2504	0	0	61.682	0	0	0	0	0	0	0	0	0	150.966	85.4823	133.845	233.845	36.1924	0	0	0	0	0	0	0	0
61	f:Lactobacillaceae(0.9700),g:Lactobacillus(0.9200)	f:Lactobacillaceae,g:Lapidilactobacillus (99.6%)	0	0	0	0	0	52.4543	0	0	0	0	0	0	23.4991	28.0307	94.7303	0	0	35.2427	13.1777	28.9474	87.1828	43.0563	0	0	0	51.1972	0	0	22.6512	26.7517	0	0	0	0	0	0	0	0	0	24.3317	33.2366	121.473	65.4683	105.27	36.6481	19.1764	0
62	f:Actinomycetaceae(0.6600),g:Actinomyces(0.6200)	f:Actinomycetaceae,g:Scrofimicrobium (99.602%)	0	0	0	0	0	0	0	0	0	0	0	0	0	0	0	178.347	59.4966	0	0	0	0	0	0	0	0	0	0	0	0	0	20.8197	0	0	0	0	0	0	0	0	0	0	0	0	0	0	0	0
63	f:Acetobacteraceae(1.0000),g:Komagataeibacter(0.3800)	f:Acetobacteraceae,g:Komagataeibacter (97.2%)	0	0	0	0	0	0	0	0	0	0	0	0	0	0	0	0	0	0	0	0	0	0	0	0	0	0	0	0	0	0	0	0	0	0	147.76	62.6667	82.2453	111.852	294.862	0	0	0	0	0	0	0	0
64	f:Lactobacillaceae(0.9800),g:Lactobacillus(0.9400)	f:Lactobacillaceae,g:Lapidilactobacillus (99.2%)	0	0	0	0	0	55.0006	0	0	0	0	0	0	32.5854	32.962	65.2834	0	0	35.5465	0	0	105.36	21.9587	0	0	0	43.0057	14.6035	0	16.3089	14.3791	0	0	0	0	0	0	0	0	0	24.0198	23.6549	92.8209	51.3711	103.966	21.5577	16.7456	0
65	f:Acetobacteraceae(1.0000),g:Acetobacter(1.0000)	f:Acetobacteraceae,g:Acetobacter (100%)	0	0	0	0	0	14.2594	0	0	0	0	0	0	0	0	0	0	0	0	0	0	0	0	0	0	0	0	0	0	0	0	0	0	0	0	32.6413	0	0	0	37.7892	0	0	0	0	0	0	0	0
66	f:Pseudomonadaceae(1.0000),g:Pseudomonas(0.9900)	f:Burkholderiaceae,g:Paucimonas (100%)	0	0	0	0	0	0	68.4306	73.5597	82.1358	78.7066	59.1243	0	0	0	0	0	0	0	0	0	0	0	0	0	0	0	0	0	0	0	0	0	0	0	0	0	0	0	0	0	0	0	0	0	0	0	0
67	f:Bifidobacteriaceae(1.0000),g:Bifidobacterium(0.9700)	f:Bifidobacteriaceae,g:Bifidobacterium (100%)	0	0	0	0	0	0	0	0	0	0	0	0	0	0	0	0	0	0	0	0	0	0	0	0	0	0	0	0	0	0	0	0	0	0	125.028	31.0292	61.553	44.0452	174.043	0	0	0	0	0	0	0	0
68	f:Acetobacteraceae(1.0000),g:Acetobacter(1.0000)	f:Acetobacteraceae,g:Acetobacter (100%)	0	0	0	0	0	0	0	0	0	0	0	0	0	0	0	0	0	0	0	0	0	0	0	0	0	0	0	0	0	0	0	0	0	0	141.349	61.4499	72.2921	76.2098	183.623	0	0	0	0	0	0	0	0
69	f:Moraxellaceae(1.0000),g:Acinetobacter(1.0000)	f:Moraxellaceae,g:Acinetobacter (100%)	0	0	0	0	0	0	0	0	0	0	0	0	0	0	0	0	0	0	0	0	0	0	0	0	0	0	0	0	0	0	0	0	0	0	0	0	0	0	0	0	0	0	0	0	0	0	0
70	f:Lactobacillaceae(1.0000),g:Lactobacillus(0.9900)	f:Lactobacillaceae,g:Loigolactobacillus (100%)	0	0	0	0	0	20.3706	0	0	0	0	0	0	0	20.2444	33.614	0	0	17.0137	19.5393	14.4737	53.1849	26.2644	28.4655	16.3159	0	19.4549	17.7533	0	0	0	0	0	14.4658	0	0	0	0	0	0	0	0	26.2644	0	0	0	51.8574	0
71	f:Enterococcaceae(0.7900),g:Enterococcus(0.7900)	f:Enterococcaceae,g:Enterococcus (100%)	0	0	0	0	0	18.8428	0	0	0	0	0	36.3898	24.7524	0	15.8347	108.973	28.6983	88.1068	26.8097	39.71	0	0	0	0	0	62.4606	21.7621	21.8947	33.5238	93.2966	0	177.919	101.523	44.6404	0	0	0	0	0	0	0	0	0	0	45.6304	24.0381	68.013
72	f:Streptococcaceae(1.0000),g:Lactococcus(1.0000)	f:Streptococcaceae,g:Lactococcus (100%)	0	0	0	0	0	17.8243	235.867	194.302	241.978	164.701	184.084	41.5884	0	22.0612	18.6127	0	57.3967	0	27.7186	94.6359	0	0	0	0	0	31.7423	29.4934	30.5614	77.4672	0	0	0	0	0	23.0238	13.0809	25.6689	20.5737	64.9335	0	0	0	0	0	0	0	0
73	f:Moraxellaceae(1.0000),g:Acinetobacter(1.0000)	f:Moraxellaceae,g:Acinetobacter (100%)	0	0	0	0	0	0	39.6752	37.1513	51.9388	28.8591	31.6395	0	1424.67	102.52	86.3963	0	30.4482	0	0	30.4319	0	0	15.1041	0	0	0	14.0308	0	18.121	0	0	0	0	0	0	0	0	0	0	0	0	0	0	0	0	0	0
74	f:Lactobacillaceae(0.9900),g:Lactobacillus(0.9900)	f:Lactobacillaceae,g:Companilactobacillus (100%)	0	0	0	0	0	93.7047	0	0	0	0	0	0	31.0188	47.2369	156.958	0	0	16.1023	0	0	96.2714	102.474	52.2835	0	0	0	0	0	22.1982	35.446	0	0	0	0	0	0	0	0	0	0	0	0	0	23.4657	20.4798	0	0
75	f:Moraxellaceae(1.0000),g:Acinetobacter(1.0000)	f:Moraxellaceae,g:Acinetobacter (100%)	0	0	0	0	0	0	0	0	0	0	0	0	0	0	0	14.4274	177.09	0	32.717	430.129	0	0	0	0	0	139.256	115.396	109.018	345.205	0	0	0	0	0	42.8418	15.5146	28.0263	34.193	60.6755	0	0	0	0	0	0	0	0
76	f:Enterococcaceae(0.6100),g:Enterococcus(0.5800)	f:Enterococcaceae,g:Vagococcus (99.6%)	0	0	0	0	0	0	0	0	0	0	0	32.231	0	0	16.9459	0	23.0987	234.242	84.9733	135.088	0	0	0	0	0	130.041	50.3965	45.614	114.162	0	0	0	0	0	0	0	0	0	0	0	0	0	0	0	0	0	0
77	f:Enterobacteriaceae(0.9900),g:Hafnia(0.7600)	f:Yersiniaceae,g:Rouxiella (100%)	0	0	0	0	0	39.2134	258.799	249.286	241.576	187.73	220.518	0	0	0	0	0	41.6476	0	0	59.3794	0	0	0	0	0	0	0	42.8772	76.1082	0	0	0	0	0	0	36.2007	0	0	0	0	0	0	0	0	0	0	0
78	f:Enterobacteriaceae(1.0000),g:Cronobacter(0.9400)	f:Enterobacteriaceae,g:Cronobacter (100%)	0	0	0	0	0	0	0	0	0	0	0	0	0	0	0	0	0	0	0	0	0	0	0	0	0	0	0	0	0	0	0	0	0	0	0	0	0	0	0	0	0	0	0	0	0	0	0
79	f:Flavobacteriaceae(1.0000),g:Flavobacterium(0.9300)	f:Flavobacteriaceae,g:Flavobacterium (96.8%)	0	0	0	0	0	0	0	0	0	0	0	73.8193	225.591	213.604	28.8914	0	0	37.6732	0	22.2673	0	0	0	0	0	0	23.7665	0	0	0	0	105.197	0	17.3735	0	0	0	0	0	0	0	0	0	0	0	43.2145	17.6834
80	f:Enterobacteriaceae(1.0000),g:Erwinia(0.7700)	f:Erwiniaceae,g:Pantoea (100%)	0	0	0	0	0	182.317	69.8866	63.9003	61.1992	46.3494	57.2068	34.3104	15.666	19.9848	23.0575	0	0	0	0	15.9582	0	0	0	0	0	0	0	0	13.1377	0	0	0	0	0	0	0	0	0	0	0	0	0	0	0	0	0	0
81	f:Moraxellaceae(1.0000),g:Acinetobacter(1.0000)	f:Moraxellaceae,g:Acinetobacter (99.6%)	0	0	0	0	0	0	0	13.003	0	0	0	0	903.618	54.5041	79.729	0	0	0	0	0	0	0	0	0	0	0	0	0	0	0	0	0	0	0	0	0	0	0	0	0	0	0	0	0	0	0	0
82	f:Sphingobacteriaceae(1.0000),g:Sphingobacterium(1.0000)	f:Sphingobacteriaceae,g:Sphingobacterium (100%)	0	0	0	0	0	0	0	0	0	0	0	18.1949	0	56.5804	0	20.8737	0	41.319	13.6321	31.1742	0	0	0	0	0	0	0	0	0	17.0542	0	171.257	42.6083	33.5406	0	0	0	0	0	0	0	0	0	0	0	14.855	92.2256
83	f:Lactobacillaceae(1.0000),g:Lactobacillus(0.9400)	f:Lactobacillaceae,g:Paucilactobacillus (100%)	0	0	0	0	0	0	0	0	0	0	0	0	0	0	0	0	0	52.5602	27.2641	24.1229	20.1968	0	0	21.9637	0	49.1493	13.7445	31.4737	27.6345	37.118	0	0	38.4001	48.0186	0	0	0	0	0	0	0	0	0	0	89.8237	41.3239	0
84	f:Lactobacillaceae(1.0000),g:Lactobacillus(1.0000)	f:Lactobacillaceae,g:Lentilactobacillus (99.6%)	0	0	0	0	0	0	0	0	0	0	0	0	0	0	0	0	0	0	0	0	0	0	0	0	0	0	0	0	0	0	19.1201	13.8782	21.5672	20.2691	0	0	0	0	0	37.1215	13.4743	20.2952	0	20.2066	0	0	0
85	f:Porphyromonadaceae(0.9800),g:Dysgonomonas(0.8700)	f:Dysgonomonadaceae,g:Dysgonomonas (99.2%)	0	0	0	0	0	0	0	0	0	0	0	0	0	0	0	0	0	0	0	0	0	0	0	0	0	0	0	0	0	0	0	0	0	0	0	0	0	0	0	0	0	0	0	0	0	0	0
86	f:Lactobacillaceae(1.0000),g:Lactobacillus(1.0000)	f:Lactobacillaceae,g:Dellaglioa (100%)	0	0	0	0	0	13.7501	166.345	248.171	178.363	151.292	207.415	0	0	0	15.5569	0	0	0	0	0	20.1968	0	0	0	0	0	0	0	0	0	0	0	0	0	0	39.8512	0	0	0	0	0	0	0	0	0	0	0
87	f:Leuconostocaceae(1.0000),g:Leuconostoc(1.0000)	f:Lactobacillaceae,g:Leuconostoc (100%)	0	0	0	0	0	33.1022	203.108	195.045	198.897	221.253	181.528	0	0	0	0	0	0	0	0	0	0	13.778	0	0	0	0	0	0	0	0	0	0	0	0	0	0	0	0	0	0	0	0	0	0	0	0	0
88	f:Bacillaceae(0.9900),g:Bacillus(0.9200)	f:Bacillaceae,g:Evansella (99.2%)	0	0	0	0	0	0	0	0	0	0	0	0	0	0	0	0	0	0	0	0	0	0	0	0	0	0	0	0	0	0	0	0	0	0	56.5395	24.3366	33.0029	37.6702	111.771	0	0	0	0	0	0	0	0
89	f:Acetobacteraceae(1.0000),g:Acetobacter(1.0000)	f:Acetobacteraceae,g:Acetobacter (100%)	0	0	0	0	0	0	0	0	0	0	0	0	0	0	0	0	0	0	0	0	0	0	0	0	0	0	0	0	0	0	0	0	0	0	59.4539	25.8576	35.0983	39.1191	102.19	0	0	0	0	0	0	0	0
90	f:Pseudomonadaceae(1.0000),g:Pseudomonas(1.0000)	f:Pseudomonadaceae,g:Pseudomonas (100%)	0	0	0	0	0	170.604	90.2702	97.708	105.085	88.3263	89.1659	0	0	0	0	0	0	0	0	0	0	0	0	0	0	0	0	0	0	0	0	0	0	0	0	0	0	0	0	0	0	0	0	0	0	0	0
91	f:Lysobacteraceae(0.9300),g:Xanthomonas(0.4000)	f:Xanthomonadaceae,g:Stenotrophomonas (97.61%)	0	0	0	0	0	0	0	0	0	0	0	0	0	0	0	0	0	0	0	0	0	0	0	0	0	0	0	0	0	0	0	0	0	0	84.2263	20.6861	33.7887	39.4089	100.061	0	0	0	0	0	0	0	0
93	f:Staphylococcaceae(0.9900),g:Staphylococcus(0.9900)	f:Staphylococcaceae,g:Staphylococcus (100%)	0	0	0	0	0	13.2409	0	0	0	0	0	32.231	30.0788	0	22.7797	0	0	0	0	0	0	0	18.5897	0	0	0	0	0	0	0	0	0	0	0	0	0	0	13.3295	13.306	0	0	0	0	0	0	0	0
94	f:Lachnospiraceae(0.5000),g:Butyrivibrio(0.4600)	f:Lachnospiraceae,g:Cuneatibacter (96.4%)	0	0	0	0	0	0	0	0	0	0	0	0	0	0	0	0	219.787	0	0	0	0	0	0	0	0	0	0	0	0	0	0	0	0	0	0	0	0	0	0	0	0	0	0	0	0	0	0
95	f:Staphylococcaceae(0.9900),g:Staphylococcus(0.9900)	f:Staphylococcaceae,g:Staphylococcus (100%)	0	0	0	0	0	0	0	0	0	0	0	0	0	0	0	0	0	0	0	0	0	0	0	0	0	0	0	0	0	0	0	0	0	0	0	0	0	0	0	0	0	0	0	0	0	0	0
96	f:Enterobacteriaceae(1.0000),g:Pantoea(0.5500)	f:Erwiniaceae,g:Pantoea (100%)	0	0	0	0	0	0	0	0	0	0	0	0	0	0	0	0	63.6963	0	15.9041	123.954	0	0	31.951	0	0	27.6465	0	42.8772	88.7929	0	0	0	0	0	30.3098	15.8188	19.3827	19.1249	37.7892	0	0	0	0	0	0	0	0
97	f:Moraxellaceae(1.0000),g:Acinetobacter(1.0000)	f:Moraxellaceae,g:Acinetobacter (100%)	0	0	0	0	0	38.7041	0	0	0	0	0	110.209	104.336	341.299	113.621	0	0	0	0	0	0	0	0	0	0	0	0	13.2281	0	0	0	0	0	0	0	0	0	0	0	0	0	0	0	0	0	0	0
98	f:Moraxellaceae(1.0000),g:Acinetobacter(1.0000)	f:Moraxellaceae,g:Acinetobacter (100%)	0	0	0	0	0	13.7501	0	0	0	0	0	303.075	83.0301	161.436	70.5616	0	0	0	0	0	0	0	19.1706	0	0	0	0	0	0	0	0	19.9846	0	0	0	0	0	0	0	0	0	0	0	0	0	0	13.0585
99	f:Clostridiaceae(0.4900),g:Clostridium(0.4800)	f:Lachnospiraceae,g:Tyzzerella (90%)	0	0	0	0	0	0	0	0	0	0	0	0	0	0	0	26.706	24.1486	59.8518	31.3538	568.929	0	0	0	0	0	0	0	0	0	0	0	0	0	0	0	0	0	0	0	0	0	0	0	0	0	0	0
100	f:Bacillaceae(1.0000),g:Bacillus(0.9400)	f:Bacillaceae,g:Niallia (100%)	0	0	0	0	0	0	0	0	0	0	0	0	0	0	0	0	0	0	0	0	0	0	0	0	0	0	0	0	0	0	0	0	0	0	86.2664	30.4207	41.9084	34.193	83.5619	0	0	0	0	0	0	0	0
101	f:Sphingobacteriaceae(1.0000),g:Sphingobacterium(1.0000)	f:Sphingobacteriaceae,g:Sphingobacterium (99.6%)	0	0	0	0	0	0	0	0	0	0	0	0	0	13.4962	0	0	0	34.6351	0	21.525	0	0	0	0	0	0	0	0	0	0	0	119.63	28.4055	29.9211	0	0	0	0	0	0	0	0	0	0	0	0	57.675
102	f:Lactobacillaceae(1.0000),g:Lactobacillus(1.0000)	f:Lactobacillaceae,g:Limosilactobacillus (100%)	0	0	0	0	0	21.3891	0	0	0	0	0	0	0	14.5344	30.2804	0	0	0	0	0	25.9192	0	19.1706	15.0608	0	0	0	0	0	0	0	0	0	0	0	0	0	0	0	0	0	0	0	0	0	0	0
103	f:Lactobacillaceae(1.0000),g:Lactobacillus(1.0000)	f:Lactobacillaceae,g:Lacticaseibacillus (100%)	0	0	0	0	0	0	0	0	0	0	0	0	0	0	15.8347	0	0	0	0	0	0	26.6949	0	0	0	0	0	0	0	66.8793	34.8412	0	0	0	0	0	0	0	0	0	0	14.0276	0	16.2956	95.9317	64.2816	0
104	f:Prevotellaceae(1.0000),g:Prevotella(1.0000)	f:Prevotellaceae,g:Prevotella (100%)	0	0	0	0	0	0	0	18.9472	17.7156	0	13.1032	0	0	0	0	0	36.0479	0	0	107.625	0	0	0	0	0	0	14.8899	20.0702	49.8327	0	0	0	0	0	43.4247	0	31.6933	18.5453	35.1279	0	0	0	0	0	0	0	0
105	f:Sphingobacteriaceae(1.0000),g:Sphingobacterium(1.0000)	f:Sphingobacteriaceae,g:Sphingobacterium (99.2%)	0	0	0	0	0	0	0	0	0	0	0	43.1479	0	68.5194	0	0	0	14.5832	0	28.9474	0	0	0	0	0	0	0	0	0	0	0	87.7103	20.2521	0	0	0	0	0	0	0	0	0	0	0	0	0	60.1235
106	f:Pseudomonadaceae(1.0000),g:Pseudomonas(0.9500)	f:Pseudomonadaceae,g:Pseudomonas (100%)	0	0	0	0	0	0	0	0	0	0	0	0	363.766	230.215	0	0	0	0	0	0	0	0	0	0	0	0	0	0	0	0	0	0	0	0	0	0	0	0	0	0	0	0	0	0	0	0	0
107	f:Lactobacillaceae(1.0000),g:Lactobacillus(1.0000)	f:Lactobacillaceae,g:Lacticaseibacillus (100%)	0	0	0	0	0	0	25.1155	24.5199	30.5996	20.1139	31.6395	0	0	0	0	0	0	0	0	0	0	0	0	0	0	0	0	0	0	0	0	0	0	0	29.1441	33.767	22.0019	27.818	49.4985	0	0	0	0	0	0	0	0
108	f:Actinomycetaceae(0.9700),g:Actinomyces(0.9700)	f:Actinomycetaceae,g:Actinomyces (100%)	0	0	0	0	0	0	0	0	0	0	0	72.2598	64.8574	0	0	0	0	43.4457	0	26.7207	0	0	0	0	0	13.3113	0	0	21.2922	0	0	0	16.0439	0	0	0	0	0	0	0	0	0	0	0	0	0	0
109	f:Lactobacillaceae(1.0000),g:Lactobacillus(1.0000)	f:Lactobacillaceae,g:Limosilactobacillus (100%)	0	0	0	0	0	0	87.7222	97.3365	77.3043	76.3746	110.898	96.6929	0	0	14.1679	0	0	0	0	0	0	0	0	0	0	0	0	0	0	0	0	0	0	0	0	0	0	0	0	0	0	0	0	0	0	0	0
111	f:Streptococcaceae(1.0000),g:Streptococcus(1.0000)	f:Streptococcaceae,g:Streptococcus (100%)	0	0	0	0	0	0	76.0745	206.561	79.72	53.6371	66.7945	0	0	0	0	0	0	0	0	0	0	0	0	0	0	0	0	0	0	0	0	0	0	0	0	0	0	0	0	0	0	0	0	0	0	0	0
112	f:Bacillaceae(0.9900),g:Bacillus(0.8000)	f:Bacillaceae,g:Lysinibacillus (100%)	0	0	0	0	0	0	0	0	0	0	0	27.5523	0	24.9161	17.5015	0	0	127.299	0	0	0	0	0	0	0	0	0	0	0	0	0	24.4257	0	0	0	0	0	0	13.306	0	0	0	0	0	0	0	0
113	f:Enterococcaceae(0.8200),g:Enterococcus(0.7600)	f:Enterococcaceae,g:Enterococcus (100%)	0	0	0	0	0	0	0	0	0	0	0	0	0	0	0	0	0	49.2183	21.8113	15.9582	0	0	0	0	0	32.7662	0	0	22.1982	13.0415	0	18.0417	20.5151	22.4408	0	0	0	0	0	0	0	0	0	0	0	0	0
114	f:Enterobacteriaceae(1.0000),g:Escherichia(0.6700)	f:Enterobacteriaceae,g:Pseudescherichia (100%)	0	0	0	0	0	0	26.9355	26.3775	24.1576	27.6931	28.124	0	0	15.5726	0	0	0	0	0	0	0	0	24.399	0	0	0	0	0	0	0	0	0	0	0	18.9436	0	0	0	43.6438	0	0	0	0	0	0	0	0
115	f:Streptococcaceae(1.0000),g:Lactococcus(1.0000)	f:Streptococcaceae,g:Lactococcus (100%)	0	0	0	0	0	0	111.746	110.34	103.475	78.4151	74.1451	0	0	0	0	0	0	0	0	0	0	0	0	0	0	0	0	0	0	0	0	0	0	0	0	0	0	0	0	0	0	0	0	0	0	0	0
116	f:Lactobacillaceae(1.0000),g:Lactobacillus(1.0000)	f:Lactobacillaceae,g:Lacticaseibacillus (100%)	0	0	0	0	0	19.3521	0	0	0	0	0	0	0	0	0	0	0	0	0	0	20.87	0	0	0	0	0	0	0	0	14.3791	0	0	0	0	0	0	0	0	0	0	0	0	0	0	50.3013	52.1275	0
117	f:Streptococcaceae(1.0000),g:Streptococcus(1.0000)	f:Streptococcaceae,g:Streptococcus (100%)	0	0	0	0	0	0	123.758	122.228	95.4224	100.278	99.3928	0	0	0	0	0	0	0	0	0	0	0	0	0	0	0	0	0	0	0	0	0	0	0	0	0	0	0	0	0	0	0	0	0	0	0	0
118	f:Pseudomonadaceae(1.0000),g:Pseudomonas(1.0000)	f:Pseudomonadaceae,g:Pseudomonas (100%)	0	0	0	0	0	0	89.5422	92.5069	102.267	79.5811	88.2071	0	0	0	0	0	0	0	0	0	0	0	0	0	0	0	0	0	0	0	0	0	0	0	0	0	0	0	0	0	0	0	0	0	0	0	0
119	f:Moraxellaceae(1.0000),g:Acinetobacter(1.0000)	f:Moraxellaceae,g:Acinetobacter (100%)	0	0	0	0	0	129.862	0	0	0	0	0	100.852	49.1914	85.6493	80.0068	0	0	0	0	0	0	0	0	0	0	0	0	13.6842	0	0	0	0	0	0	0	0	0	0	0	0	0	0	0	0	0	0	0
120	f:Moraxellaceae(1.0000),g:Acinetobacter(1.0000)	f:Moraxellaceae,g:Acinetobacter (100%)	0	0	0	0	0	0	0	0	0	0	0	0	0	0	0	0	55.2968	0	14.9953	99.4604	0	0	0	0	0	65.5325	32.9295	25.5439	62.9704	0	0	0	0	0	0	0	0	0	28.741	0	0	0	0	0	0	0	0
121	f:Clostridiaceae(1.0000),g:Clostridium(1.0000)	f:Clostridiaceae,g:Clostridium (100%)	0	0	0	0	0	0	0	0	0	0	0	0	0	0	0	0	0	58.9404	0	43.7923	0	0	0	0	0	0	0	0	0	15.7166	0	39.6917	0	0	0	0	0	0	0	0	0	0	0	0	0	0	0
122	f:Leuconostocaceae(1.0000),g:Weissella(1.0000)	f:Lactobacillaceae,g:Weissella (100%)	0	0	0	0	0	0	42.5871	46.8107	40.2626	58.3012	56.248	0	0	0	0	0	0	0	0	35.9987	0	0	0	0	0	0	0	20.9825	28.9936	0	0	0	0	0	0	0	0	0	20.7574	0	0	0	0	0	0	0	0
123	f:Clostridiaceae(0.9600),g:Clostridium(0.8000)	f:Lachnospiraceae,g:Muricomes (100%)	0	0	0	0	0	0	0	0	0	0	0	0	0	0	0	0	0	0	0	0	0	0	0	0	0	0	0	0	0	0	0	0	0	0	0	0	0	0	0	0	0	0	0	0	0	0	0
124	f:Caulobacteraceae(1.0000),g:Brevundimonas(1.0000)	f:Caulobacteraceae,g:Brevundimonas (98.8%)	0	0	0	0	0	0	0	0	0	0	0	0	60.4709	264.734	0	0	0	0	0	0	0	0	0	0	0	0	0	0	0	0	0	0	0	0	0	0	0	0	0	0	0	0	0	0	0	0	0
125	f:Comamonadaceae(0.9300),g:Comamonas(0.7700)	f: Comamonadaceae,g:Comamonas (100%)	0	0	0	0	0	0	0	0	0	0	0	61.8627	0	26.4734	0	0	0	0	0	0	0	0	0	0	0	0	0	0	0	20.3982	0	0	26.3014	0	0	0	0	0	0	0	0	0	0	0	0	75.0852	0
126	f:Micrococcaceae(1.0000),g:Arthrobacter(1.0000)	f:Micrococcaceae,g:Glutamicibacter (97.6%)	0	0	0	0	0	0	0	0	0	0	0	174.671	28.5122	0	16.1125	0	0	0	0	0	0	0	0	0	0	0	0	0	0	0	0	0	0	0	0	0	0	0	0	0	0	0	0	0	0	0	0
127	f:Bacillaceae(1.0000),g:Bacillus(1.0000)	f:Bacillaceae,g:Bacillus (100%)	0	0	0	0	0	0	0	0	0	0	0	0	0	0	0	0	0	0	0	0	0	21.5282	0	32.0042	0	0	0	0	0	0	0	0	0	0	0	0	0	0	0	0	0	0	0	0	0	0	0
128	f:Dietziaceae(0.5800),g:Dietzia(0.5800)	f:Lawsonellaceae,g:Lawsonella (100%)	0	0	0	0	0	0	0	0	0	0	0	0	0	0	0	0	0	0	0	0	50.492	34.0145	38.9222	20.0811	0	0	17.1806	0	0	0	0	0	0	0	0	0	0	0	0	0	0	0	0	0	0	0	0
129	f:Brucellaceae(1.0000),g:Ochrobactrum(0.9200)	f:Brucellaceae,g:Brucella (100%)	0	0	0	0	0	0	0	0	0	0	0	0	119.062	116.794	0	0	0	0	0	0	0	0	0	0	0	0	0	0	0	0	0	0	0	0	0	0	0	0	0	0	0	0	0	0	0	0	0
130	f:Enterobacteriaceae(1.0000),g:Kosakonia(0.4900)	f:Enterobacteriaceae,g:Salmonella (100%)	0	0	0	0	0	0	0	0	0	0	0	13.5162	0	0	0	0	28.6983	0	15.4497	89.0691	0	0	0	0	0	28.6704	26.3436	37.8596	63.8765	0	0	0	0	0	0	0	0	0	0	0	0	0	0	0	0	0	0
131	f:Pseudomonadaceae(1.0000),g:Pseudomonas(1.0000)	f:Xanthomonadaceae,g:Stenotrophomonas (100%)	0	0	0	0	0	13.7501	0	0	0	0	0	19.7545	77.077	71.8935	46.3929	0	0	13.6717	0	0	0	0	0	0	0	14.3352	0	0	0	0	0	0	0	0	0	0	0	0	0	0	0	0	0	0	0	0	0
132	f:Bacillaceae(1.0000),g:Lysinibacillus(0.7500)	f:Bacillaceae,g:Lysinibacillus (100%)	0	0	0	0	0	0	0	0	0	0	0	0	0	0	0	0	0	0	0	0	0	0	0	0	0	0	0	0	0	0	0	0	0	0	26.8125	0	14.668	14.1988	43.6438	0	0	0	0	0	0	0	0
133	f:Flavobacteriaceae(1.0000),g:Empedobacter(1.0000)	f:Weeksellaceae,g:Empedobacter (99.6%)	0	0	0	0	0	0	0	0	14.4945	0	0	14.5559	20.3659	96.2905	23.0575	0	0	21.8748	0	20.7828	0	0	0	0	0	0	0	0	0	0	0	0	0	0	0	0	0	0	0	0	0	0	0	0	0	59.9601	0
134	f:Actinomycetaceae(0.9100),g:Actinomyces(0.9000)	f:Actinomycetaceae,g:Actinomyces (97.6%)	0	0	0	0	0	0	0	0	0	0	0	25.9927	0	0	0	0	0	0	0	0	0	0	0	0	0	0	0	0	0	0	0	0	0	0	0	0	0	0	0	0	0	0	0	0	0	0	0
135	f:Lactobacillaceae(0.8900),g:Lactobacillus(0.8900)	f:Lactobacillaceae,g:Bombilactobacillus (97.61%)	0	0	0	0	0	0	0	0	0	0	0	0	0	0	0	0	0	0	0	0	0	0	0	0	0	0	0	0	0	0	0	0	0	0	0	14.2977	14.1441	39.9884	0	0	0	0	0	0	0	0	0
136	f:Clostridiaceae(1.0000),g:Clostridium(0.9800)	f:Clostridiaceae,g:Hungatella (100%)	0	0	0	0	0	0	0	0	0	0	0	0	0	0	0	0	0	0	0	0	0	0	0	0	0	0	0	0	0	0	0	0	0	0	19.5265	0	0	13.6192	31.4023	0	0	0	0	0	0	0	0
137	f:Acetobacteraceae(1.0000),g:Acetobacter(1.0000)	f:Acetobacteraceae,g:Acetobacter (100%)	0	0	0	0	0	0	0	0	0	0	0	0	0	0	0	0	0	0	0	0	0	0	0	0	0	0	0	0	0	0	0	0	0	0	0	0	0	0	0	0	0	0	0	0	0	0	0
138	f:Bacillaceae(1.0000),g:Bacillus(0.9700)	f:Bacillaceae,g:Weizmannia (100%)	0	0	0	0	0	106.436	0	0	0	0	0	167.913	36.9719	48.0155	67.5058	0	0	0	0	0	0	0	0	0	0	0	0	0	0	0	0	0	0	0	0	0	0	0	0	0	0	0	0	0	0	0	0
139	f:Clostridiaceae(1.0000),g:Clostridium(1.0000)	f:Lachnospiraceae,g:Lacrimispora (100%)	0	0	0	0	0	0	0	0	0	0	0	0	0	0	0	0	0	0	0	0	0	0	0	0	0	0	0	0	0	0	0	0	0	0	17.4864	0	0	0	20.2252	0	0	0	0	0	0	0	0
140	f:Pseudomonadaceae(1.0000),g:Pseudomonas(1.0000)	f:Pseudomonadaceae,g:Pseudomonas (100%)	0	0	0	0	0	0	60.4228	59.4422	61.1992	53.0541	46.3407	0	0	0	0	0	0	0	0	0	0	0	0	0	0	0	0	0	0	0	0	0	0	0	0	0	0	0	0	0	0	0	0	0	0	0	0
141	f:Enterococcaceae(0.7900),g:Enterococcus(0.7900)	f:Enterococcaceae,g:Enterococcus (100%)	0	0	0	0	0	0	0	0	0	0	0	46.267	18.1726	14.2749	0	0	0	27.9511	0	16.3293	0	0	0	0	0	19.4549	0	0	0	0	0	0	0	0	0	0	0	0	0	0	0	0	0	0	34.133	0	0
142	f:Lactobacillaceae(1.0000),g:Lactobacillus(1.0000)	f:Lactobacillaceae,g:Liquorilactobacillus (100%)	0	0	0	0	0	0	0	0	0	0	0	0	0	0	0	0	13.2992	0	0	28.2052	0	0	0	0	0	18.431	0	21.4386	53.0039	0	0	0	0	0	16.0292	0	0	15.6476	30.3378	0	0	0	0	0	0	0	0
144	f:Sphingobacteriaceae(1.0000),g:Sphingobacterium(1.0000)	f:Sphingobacteriaceae,g:Sphingobacterium (99.6%)	0	0	0	0	0	0	0	0	0	0	0	0	0	15.8321	0	0	0	0	0	26.3496	0	0	0	0	0	0	0	0	0	0	0	24.7032	0	0	0	0	0	0	0	0	0	0	0	0	0	0	16.8672
145	f:Clostridiaceae(0.4900),g:Clostridium(0.3600)	f:Lachnospiraceae,g:Lachnoclostridium (96.8%)	0	0	0	0	0	0	0	0	0	0	0	0	0	0	0	0	64.0463	0	0	0	0	0	0	0	0	0	0	0	0	0	0	0	0	0	0	0	0	0	0	0	0	0	0	0	0	0	0
147	f:Clostridiaceae(1.0000),g:Clostridium(1.0000)	f:Lachnospiraceae,g:Anaerocolumna (100%)	0	0	0	0	0	0	0	0	0	0	0	0	0	0	0	0	0	0	0	0	0	0	0	0	0	0	0	0	0	0	0	0	0	0	15.7378	0	0	0	18.6285	0	0	0	0	0	0	0	0
148	f:Brucellaceae(1.0000),g:Ochrobactrum(0.9600)	f:Brucellaceae,g:Brucella (99.6%)	0	0	0	0	0	0	0	0	0	0	0	57.184	30.7055	15.5726	0	0	0	0	0	0	0	0	0	0	0	0	0	0	0	0	0	24.4257	0	13.7541	0	0	0	0	0	0	0	0	0	0	0	0	0
149	f:Oxalobacteraceae(1.0000),g:Janthinobacterium(0.9900)	f:Oxalobacteraceae,g:Janthinobacterium (100%)	0	0	0	0	0	0	45.4991	49.4113	48.7178	39.6448	35.7942	0	0	0	0	0	0	0	0	0	0	0	0	0	0	0	0	0	0	0	0	0	0	0	0	0	0	0	0	0	0	0	0	0	0	0	0
150	f:Caulobacteraceae(1.0000),g:Brevundimonas(1.0000)	f:Caulobacteraceae,g:Brevundimonas (98.8%)	0	0	0	0	0	0	0	0	0	0	0	0	24.7524	167.924	0	0	0	0	0	0	0	0	0	0	0	0	0	0	0	0	0	0	0	0	0	0	0	0	0	0	0	0	0	0	0	0	0
151	f:Sphingomonadaceae(1.0000),g:Sphingobium(0.9600)	f:Sphingomonadaceae,g:Sphingobium (100%)	0	0	0	0	0	0	0	0	0	0	0	0	55.7711	40.4887	88.3409	0	0	0	0	0	0	0	0	0	0	0	0	0	0	0	0	0	0	0	0	0	0	0	0	0	0	0	0	0	0	0	0
152	f:Paenibacillaceae(1.0000),g:Brevibacillus(1.0000)	f:Paenibacillaceae,g:Brevibacillus (100%)	0	0	0	0	0	0	0	0	0	0	0	0	0	0	0	0	0	0	0	0	0	0	0	0	0	0	0	0	0	0	0	0	0	0	23.3152	0	0	0	23.4186	0	0	0	0	0	0	0	0
153	f:Pseudomonadaceae(1.0000),g:Pseudomonas(0.9900)	f:Pseudomonadaceae,g:Pseudomonas (100%)	0	0	0	0	0	0	0	0	0	0	0	0	143.814	38.1529	0	0	0	0	0	0	0	0	0	0	0	0	0	0	0	0	0	0	0	0	0	0	0	0	0	0	0	0	0	0	0	0	0
154	f:Unclassified_Clostridiales(0.9900),g:Sedimentibacter(0.9500)	f:Unclassified_Clostridiales,g:Sedimentibacter (95.6%)	0	0	0	0	0	0	0	0	0	0	0	0	0	0	0	0	246.386	0	0	0	0	0	0	0	0	0	0	0	0	0	0	0	0	0	0	0	0	0	0	0	0	0	0	0	0	0	0
155	f:Lysobacteraceae(0.6100),g:Stenotrophomonas(0.6100)	f:Xanthomonadaceae,g:Stenotrophomonas (99.6%)	0	0	0	0	0	0	0	0	0	0	0	20.2743	65.7974	56.5804	0	0	0	0	0	0	0	0	0	0	0	0	0	0	0	0	0	19.7071	0	0	0	0	0	0	0	0	0	0	0	0	0	0	0
156	f:Rhodobacteraceae(0.9400),g:Paracoccus(0.3600)	f:Paracoccaceae,g:Sinirhodobacter (100%)	0	0	0	0	0	0	0	0	0	0	0	0	0	0	0	0	0	14.2794	0	0	0	0	0	0	0	0	0	0	0	0	0	0	18.674	37.4014	0	0	0	0	0	0	0	0	0	0	0	0	0
157	f:Lactobacillaceae(1.0000),g:Lactobacillus(1.0000)	f:Lactobacillaceae,g:Lentilactobacillus (100%)	0	0	0	0	0	0	0	0	0	0	0	0	0	0	0	0	0	0	0	0	0	0	0	0	0	0	0	0	0	0	0	0	0	0	0	0	0	0	0	0	0	0	0	0	0	0	0
158	f:Lactobacillaceae(1.0000),g:Lactobacillus(1.0000)	f:Lactobacillaceae,g:Lentilactobacillus (99.2%)	0	0	0	0	0	0	0	0	0	0	0	0	0	0	0	0	0	0	0	0	0	0	0	0	0	0	0	0	0	0	0	0	0	0	0	0	0	0	0	0	0	0	0	0	0	0	0
159	f:Moraxellaceae(1.0000),g:Acinetobacter(1.0000)	f:Moraxellaceae,g:Acinetobacter (100%)	0	0	0	0	0	0	46.9551	47.5537	36.2364	40.5193	32.5983	0	0	0	0	0	0	0	0	0	0	0	0	0	0	0	0	0	0	0	0	0	0	0	0	0	0	0	0	0	0	0	0	0	0	0	0
160	f:Paenibacillaceae(1.0000),g:Paenibacillus(1.0000)	f:Paenibacillaceae,g:Paenibacillus (100%)	0	0	0	0	0	0	0	0	0	0	0	0	0	0	0	0	0	0	0	0	0	0	0	0	0	0	0	0	0	0	0	0	0	0	13.9891	0	0	0	22.8864	0	0	0	0	0	0	0	0
161	f:Leuconostocaceae(1.0000),g:Weissella(1.0000)	f:Lactobacillaceae,g:Periweissella (100%)	0	0	0	0	0	0	42.5871	47.5537	29.3917	33.5232	47.2995	0	0	0	0	0	0	0	0	0	0	0	0	0	0	0	0	0	0	0	0	0	0	0	0	0	0	0	0	0	0	0	0	0	0	0	0
162	f:Comamonadaceae(1.0000),g:Variovorax(0.3500)	f:Comamonadaceae,g:Variovorax (100%)	0	0	0	0	0	0	0	0	0	0	0	14.0361	0	0	0	0	0	0	0	0	22.8897	15.0697	33.1129	28.239	0	0	22.9075	0	15.8559	0	0	0	0	0	0	0	0	0	0	0	0	0	0	0	0	0	0
163	f:Corynebacteriaceae(1.0000),g:Corynebacterium(1.0000)	f:Corynebacteriaceae,g:Corynebacterium (100%)	0	0	0	0	0	0	0	0	0	0	0	0	0	0	0	0	0	0	0	0	0	36.1673	0	0	0	0	0	0	0	0	0	0	0	0	0	0	0	0	0	0	0	0	0	0	0	0	0
164	f:Flavobacteriaceae(1.0000),g:Myroides(1.0000)	f:Flavobacteriaceae,g:Myroides (100%)	0	0	0	0	0	0	0	0	0	0	0	148.159	0	64.8858	16.3903	0	0	0	0	0	0	0	0	0	0	0	0	0	0	0	0	0	0	0	0	0	0	0	0	0	0	0	0	0	0	0	0
165	f:Bacillaceae(1.0000),g:Bacillus(1.0000)	f:Bacillaceae,g:Heyndrickxia (100%)	0	0	0	0	0	0	0	0	0	0	0	0	0	0	0	0	0	0	0	0	0	0	0	0	0	0	0	0	0	0	0	0	0	0	0	0	0	0	0	0	0	0	0	0	0	0	0
166	f:Planococcaceae(0.8900),g:Kurthia(0.8900)	f:Planococcaceae,g:Kurthia (100%)	0	0	0	0	0	0	0	0	0	0	0	77.9782	28.5122	54.2445	18.8905	0	0	0	0	0	0	0	0	0	0	0	0	0	0	0	0	0	0	0	0	0	0	0	0	0	0	0	0	0	0	0	0
167	f:Flavobacteriaceae(1.0000),g:Chryseobacterium(1.0000)	f:Weeksellaceae,g:Chryseobacterium (100%)	0	0	0	0	0	0	0	0	0	0	0	0	0	30.6261	0	0	0	0	0	0	0	0	0	0	0	0	0	0	0	0	0	0	0	0	0	0	0	0	0	0	0	0	0	0	0	85.6187	0
168	f:Streptococcaceae(1.0000),g:Lactococcus(1.0000)	f:Streptococcaceae,g:Lactococcus (100%)	0	0	0	0	0	0	25.8435	15.6036	20.5339	17.4904	0	0	0	0	0	0	0	0	0	0	0	0	0	0	0	0	0	0	0	0	0	0	0	0	0	0	0	0	0	0	0	0	0	0	0	0	0
169	f:Porphyromonadaceae(1.0000),g:Dysgonomonas(1.0000)	f:Dysgonomonadaceae,g:Dysgonomonas (100%)	0	0	0	0	0	0	0	0	0	0	0	0	16.2927	27.7711	0	0	0	0	0	0	0	0	0	0	0	0	0	0	0	0	0	0	0	0	0	0	0	0	0	0	0	0	0	0	0	0	0
170	f:Staphylococcaceae(0.9900),g:Staphylococcus(0.9900)	f:Staphylococcaceae,g:Staphylococcus (100%)	0	0	0	0	0	0	0	0	0	0	0	28.0721	0	0	0	0	0	0	0	0	0	0	19.1706	0	0	0	0	0	0	0	0	0	0	0	0	0	0	0	0	0	0	0	0	0	0	0	0
171	f:Micrococcaceae(0.9900),g:Arthrobacter(0.9800)	f:Micrococcaceae,g:Arthrobacter (98.8%)	0	0	0	0	0	0	0	0	0	0	0	0	19.1126	0	0	0	0	0	0	0	0	0	0	0	0	0	0	0	0	0	0	0	0	0	0	0	0	0	0	0	0	0	0	0	0	0	0
172	f:Lactobacillaceae(1.0000),g:Lactobacillus(1.0000)	f:Lactobacillaceae,g:Lacticaseibacillus (100%)	0	0	0	0	0	0	0	0	0	0	0	0	0	0	0	0	0	0	0	13.3604	0	0	0	0	0	16.3831	0	0	0	0	0	0	0	0	0	0	0	0	16.4995	0	0	0	0	0	0	0	0
174	f:Planococcaceae(0.4900),g:Bacillus(0.4100)	f:Bacillaceae,g:Psychrobacillus (99.6%)	0	0	0	0	0	0	0	0	0	0	0	0	0	0	0	0	0	0	0	0	0	0	0	0	0	0	0	0	0	0	0	0	0	0	21.858	14.2977	0	0	17.0317	0	0	0	0	0	0	0	0
175	f:Moraxellaceae(1.0000),g:Enhydrobacter(1.0000)	f:Moraxellaceae,g:Moraxella (100%)	0	0	0	0	0	0	0	0	0	0	0	0	0	0	0	0	13.9992	0	0	0	0	15.9308	0	13.8058	0	0	0	0	0	0	0	0	0	0	0	0	0	0	0	0	0	0	0	0	0	0	0
176	f:Moraxellaceae(1.0000),g:Psychrobacter(1.0000)	f:Moraxellaceae,g:Psychrobacter (100%)	0	0	0	0	0	0	46.5911	34.5508	33.418	32.0657	27.4848	0	0	0	0	0	0	0	0	0	0	0	0	0	0	0	0	0	0	0	0	0	0	0	0	0	0	0	0	0	0	0	0	0	0	0	0
177	f:Enterobacteriaceae(1.0000),g:Kosakonia(0.9700)	f:Enterobacteriaceae,g:Kosakonia (100%)	0	0	0	0	0	0	0	0	0	0	0	0	0	0	0	0	24.1486	0	0	30.803	0	0	0	0	0	0	0	0	0	0	0	0	0	0	0	0	0	0	17.564	0	0	0	0	0	0	0	0
178	f:Streptomycetaceae(1.0000),g:Streptomyces(0.9900)	f:Streptomycetaceae,g:Streptomyces (100%)	0	0	0	0	0	0	0	0	0	0	0	0	0	0	0	0	0	0	0	0	0	0	0	0	0	0	0	0	0	0	0	0	0	0	0	0	0	0	20.7574	0	0	0	0	0	0	0	0
179	f:Leuconostocaceae(1.0000),g:Leuconostoc(1.0000)	f:Lactobacillaceae,g:Leuconostoc (100%)	0	0	0	0	0	0	30.5754	29.7211	29.3917	35.2722	30.0415	0	0	0	0	0	0	0	0	0	0	0	0	0	0	0	0	0	0	0	0	0	0	0	0	0	0	0	0	0	0	0	0	0	0	0	0
180	f:Flavobacteriaceae(1.0000),g:Flavobacterium(1.0000)	f:Flavobacteriaceae,g:Flavobacterium (100%)	0	0	0	0	0	0	0	0	0	0	0	0	37.9118	79.9393	21.3907	0	0	0	0	0	0	0	0	0	0	0	0	0	0	0	0	0	0	0	0	0	0	0	0	0	0	0	0	0	0	0	0
182	f:Alcaligenaceae(1.0000),g:Achromobacter(0.9900)	f:Alcaligenaceae,g:Achromobacter (100%)	0	0	0	0	0	0	0	0	0	0	0	0	66.7374	14.5344	0	0	0	0	0	0	0	0	0	0	0	0	0	0	0	0	0	0	0	0	0	0	0	0	0	0	0	0	0	0	0	0	0
183	f:Micrococcaceae(1.0000),g:Arthrobacter(0.8700)	f:Micrococcaceae,g:Galactobacter (100%)	0	0	0	0	0	0	0	0	0	0	0	0	0	36.336	0	0	0	0	0	0	0	0	0	0	0	0	0	0	0	0	0	0	0	0	0	0	0	0	0	0	0	0	0	0	0	0	0
184	f:Vibrionaceae(1.0000),g:Photobacterium(0.9800)	f:Vibrionaceae,g:Photobacterium (100%)	0	0	0	0	0	0	24.0235	27.8635	26.1707	24.4865	23.6497	0	0	0	0	0	0	0	0	0	0	0	0	0	0	0	0	0	0	0	0	0	0	0	0	0	0	0	0	0	0	0	0	0	0	0	0
185	f:Leuconostocaceae(1.0000),g:Weissella(1.0000)	f:Lactobacillaceae,g:Weissella (100%)	0	0	0	0	0	0	22.2036	17.8326	16.5077	19.5309	21.7322	0	0	0	0	0	0	0	0	16.3293	0	0	0	0	0	0	0	0	0	0	0	0	0	0	0	0	0	0	0	0	0	0	0	0	0	0	0
186	f:Flavobacteriaceae(1.0000),g:Soonwooa(0.8100)	f:Weeksellaceae,g:Soonwooa (98%)	0	0	0	0	0	95.7418	0	0	0	0	0	29.1118	0	44.6414	0	0	0	0	0	0	0	0	0	0	0	0	0	0	0	0	0	0	0	0	0	0	0	0	0	0	0	0	0	0	0	0	0
187	f:Bacillaceae(1.0000),g:Bacillus(1.0000)	f:Bacillaceae,g:Peribacillus (100%)	0	0	0	0	0	0	0	0	0	0	0	0	0	0	0	0	0	0	0	0	0	0	0	0	0	0	0	0	0	0	0	0	0	0	13.4063	0	0	0	25.0154	0	0	0	0	0	0	0	0
188	f:Bacillaceae(1.0000),g:Lysinibacillus(0.7300)	f:Bacillaceae,g:Lysinibacillus (100%)	0	0	0	0	0	0	0	0	0	0	0	0	0	0	0	27.9339	0	19.1404	0	0	0	0	0	0	0	0	0	0	0	57.5162	0	0	0	0	0	0	0	0	0	0	0	0	0	0	0	0	0
189	f:Pseudomonadaceae(1.0000),g:Pseudomonas(1.0000)	f:Pseudomonadaceae,g:Pseudomonas (100%)	0	0	0	0	0	0	29.8474	36.0368	25.7681	28.8591	22.691	0	0	0	0	0	0	0	0	0	0	0	0	0	0	0	0	0	0	0	0	0	0	0	0	0	0	0	0	0	0	0	0	0	0	0	0
190	f:Flavobacteriaceae(1.0000),g:Flavobacterium(1.0000)	f:Flavobacteriaceae,g:Flavobacterium (100%)	0	0	0	0	0	0	25.8435	30.8356	19.7287	23.9035	23.3301	0	0	0	0	0	0	0	0	0	0	0	0	0	0	0	0	0	0	0	0	0	0	0	0	0	0	0	0	0	0	0	0	0	0	0	0
191	f:Paenibacillaceae(1.0000),g:Paenibacillus(1.0000)	f:Paenibacillaceae,g:Paenibacillus (100%)	0	0	0	0	0	0	0	0	0	0	0	0	0	0	0	0	0	0	0	0	0	0	0	0	0	0	0	0	0	0	0	0	0	0	16.0292	0	0	0	18.6285	0	0	0	0	0	0	0	0
192	f:Pseudomonadaceae(1.0000),g:Pseudomonas(0.9400)	f:Pseudomonadaceae,g:Pseudomonas (100%)	0	0	0	0	0	0	0	0	0	0	0	0	0	0	0	0	0	0	0	19.6694	0	0	0	0	0	0	0	0	14.9498	0	0	0	0	0	0	0	0	0	0	0	0	0	0	0	0	0	0
193	f:Enterobacteriaceae(1.0000),g:Brenneria(0.9900)	f:Pectobacteriaceae,g:Pectobacterium (100%)	0	0	0	0	0	0	22.5675	23.0338	33.418	20.9884	18.5363	0	0	0	0	0	0	0	0	0	0	0	0	0	0	0	0	0	0	0	0	0	0	0	0	0	0	0	0	0	0	0	0	0	0	0	0
195	f:Flavobacteriaceae(1.0000),g:Chishuiella(0.6300)	f:Weeksellaceae,g:Wautersiella (100%)	0	0	0	0	0	0	0	0	0	0	0	0	0	0	0	0	0	0	0	32.6587	0	0	0	0	0	0	0	0	31.2587	0	0	0	0	0	0	0	0	0	0	0	0	0	0	0	0	0	0
196	f:Beutenbergiaceae(0.7500),g:Miniimonas(0.5500)	f:Beutenbergiaceae,g:Miniimonas (98.4%)	0	0	0	0	0	0	0	0	0	0	0	156.996	0	0	0	0	0	0	0	0	0	0	13.3613	0	0	0	0	0	0	0	0	0	0	0	0	0	0	0	0	0	0	0	0	0	0	0	0
198	f:Planococcaceae(0.6300),g:Kurthia(0.6200)	f:Planococcaceae,g:Kurthia (100%)	0	0	0	0	0	0	0	0	0	0	0	94.6135	34.7786	31.4047	20.0017	0	0	0	0	0	0	0	0	0	0	0	0	0	0	0	0	0	0	0	0	0	0	0	0	0	0	0	0	0	0	0	0
199	f:Paenibacillaceae(1.0000),g:Paenibacillus(0.9800)	f:Paenibacillaceae,g:Paenibacillus (99.6%)	0	0	0	0	0	0	0	0	0	0	0	0	0	0	0	0	0	0	265.371	0	0	0	0	0	0	0	0	0	0	0	0	0	0	0	0	0	0	0	0	0	0	0	0	0	0	0	0
200	f:Listeriaceae(1.0000),g:Brochothrix(1.0000)	f:Listeriaceae,g:Brochothrix (100%)	0	0	0	0	0	0	23.2955	18.9472	17.7156	16.9073	22.0518	0	0	0	0	0	0	0	0	0	0	0	0	0	0	0	0	0	0	0	0	0	0	0	0	0	0	0	0	0	0	0	0	0	0	0	0
201	f:Pseudomonadaceae(0.9900),g:Pseudomonas(0.9900)	f:Pseudomonadaceae,g:Pseudomonas (100%)	0	0	0	0	0	0	0	0	0	0	0	0	104.649	17.3894	0	0	0	0	0	0	0	0	0	0	0	0	0	0	0	0	0	0	0	0	0	0	0	0	0	0	0	0	0	0	0	0	0
202	f:Comamonadaceae(0.9000),g:Pelomonas(0.4600)	f:Comamonadaceae,g:Pelomonas (100%)	0	0	0	0	0	0	0	0	0	0	0	0	0	0	0	0	0	0	0	0	16.494	0	0	0	0	0	0	0	0	0	0	0	0	0	0	0	0	0	0	0	0	0	0	0	0	0	0
203	f:Moraxellaceae(1.0000),g:Acinetobacter(1.0000)	f:Moraxellaceae,g:Acinetobacter (100%)	0	0	0	0	0	0	0	0	0	0	0	0	52.3246	0	18.3349	0	0	0	0	0	0	0	0	0	0	0	0	0	0	0	0	0	0	0	0	0	0	0	0	0	0	0	0	0	0	0	0
204	f:Bacillaceae(0.7200),g:Lysinibacillus(0.6500)	f:Bacillaceae,g:Lysinibacillus (100%)	0	0	0	0	0	0	0	0	0	0	0	0	0	0	0	0	0	0	0	0	0	0	0	0	0	0	0	0	0	0	0	0	0	0	0	0	0	0	0	0	0	0	0	0	0	0	0
205	f:Clostridiaceae(1.0000),g:Clostridium(1.0000)	f:Clostridiaceae,g:Clostridium (100%)	0	0	0	0	0	0	0	0	0	0	0	0	0	0	0	0	0	0	0	0	0	0	0	0	0	0	0	0	0	0	0	0	0	0	0	0	0	0	0	0	0	0	0	0	0	0	0
206	f:Clostridiaceae(0.8900),g:Clostridium(0.8900)	f:Oscillospiraceae,g:Scatolibacter (97.2%)	0	0	0	0	0	0	0	0	0	0	0	0	0	0	0	0	0	0	0	0	0	0	0	0	0	0	0	0	0	0	0	0	0	0	0	0	0	0	0	0	0	0	0	0	0	0	0
207	f:Actinomycetaceae(0.9500),g:Actinomyces(0.9500)	f:Actinomycetaceae,g:Actinomyces (98%)	0	0	0	0	0	0	0	0	0	0	0	0	0	0	0	0	0	0	0	0	0	0	0	0	0	0	0	0	0	0	0	0	0	0	0	0	0	0	0	0	0	0	0	0	0	0	0
208	f:Paenibacillaceae(0.9900),g:Paenibacillus(0.9500)	f:Paenibacillaceae,g:Paenibacillus (100%)	0	0	0	0	0	0	0	0	0	0	0	0	0	0	0	0	0	0	0	0	0	0	0	0	0	0	0	0	0	0	0	0	0	0	0	0	0	0	0	0	0	0	0	0	0	0	0
209	f:Clostridiaceae(1.0000),g:Mobilitalea(0.8800)	f:Lachnospiraceae,g:Mobilitalea (98.016%)	0	0	0	0	0	0	0	0	0	0	0	0	0	0	0	0	0	23.09	0	0	0	0	0	0	0	0	0	0	0	16.051	0	20.8173	0	0	0	0	0	0	0	0	0	0	0	0	0	0	0
211	f:Rhodobacteraceae(0.9300),g:Paracoccus(0.5500)	f:Paracoccaceae,g:Sinirhodobacter (99.6%)	0	0	0	0	0	0	0	0	0	0	0	0	0	0	0	0	0	0	0	0	0	0	0	0	0	0	0	0	0	0	0	0	0	19.7865	0	0	0	0	0	0	0	0	0	0	0	0	0
212	f:Carnobacteriaceae(0.9400),g:Trichococcus(0.7200)	f:Carnobacteriaceae,g:Trichococcus (100%)	0	0	0	0	0	0	0	0	0	0	0	0	0	0	0	0	0	0	0	0	0	18.0837	92.9484	25.7289	0	0	0	0	0	0	0	0	0	0	0	0	0	0	0	0	0	0	0	0	0	0	0
213	f:Alcaligenaceae(1.0000),g:Alcaligenes(0.8300)	f:Alcaligenaceae,g:Alcaligenes (100%)	0	0	0	0	0	0	0	0	0	0	0	61.8627	54.8312	0	0	0	0	0	0	0	0	0	0	0	0	0	0	0	0	0	0	0	0	0	0	0	0	0	0	0	0	0	0	0	0	0	0
214	f:Lactobacillaceae(1.0000),g:Lactobacillus(1.0000)	f:Lactobacillaceae,g:Liquorilactobacillus (100%)	0	0	0	0	0	0	0	0	0	0	0	0	0	0	0	0	0	0	0	0	0	0	0	0	0	0	0	0	0	0	0	0	0	0	0	0	0	0	14.9028	0	0	0	0	0	0	0	0
216	f:Bacillaceae(0.9500),g:Bacillus(0.9500)	f:Bacillaceae,g:Peribacillus (100%)	0	0	0	0	0	0	0	0	0	0	0	0	0	0	0	0	0	0	0	0	0	0	0	0	0	0	0	0	0	0	0	0	0	0	0	0	0	0	15.435	0	0	0	0	0	0	0	0
217	f:Paenibacillaceae(0.9900),g:Paenibacillus(0.9700)	f:Paenibacillaceae,g:Paenibacillus (98.8%)	0	0	0	0	0	0	0	0	0	0	0	0	0	0	0	0	0	0	0	0	0	0	0	0	0	0	0	0	0	0	0	0	0	0	0	0	0	0	0	0	0	0	0	0	0	0	0
218	f:Pseudomonadaceae(1.0000),g:Pseudomonas(1.0000)	f:Pseudomonadaceae,g:Pseudomonas (100%)	0	0	0	0	0	0	0	0	0	0	0	0	0	16.0917	0	0	0	0	0	0	0	0	0	0	0	0	0	17.3333	0	0	0	0	0	0	0	0	0	0	0	0	0	0	0	0	0	0	0
219	f:Streptococcaceae(1.0000),g:Streptococcus(1.0000)	f:Streptococcaceae,g:Streptococcus (100%)	0	0	0	0	0	0	0	0	0	0	0	0	0	0	0	0	18.199	0	0	0	0	0	0	25.1014	0	0	0	0	0	0	0	0	0	0	0	0	0	0	0	0	0	0	0	0	0	0	0
220	f:Bacillaceae(1.0000),g:Bacillus(1.0000)	f:Bacillaceae,g:Alkalihalobacillus (100%)	0	0	0	0	0	0	0	0	0	0	0	0	0	0	0	0	0	0	0	0	0	0	0	0	0	0	0	0	0	0	0	0	0	0	13.6977	0	0	0	0	0	0	0	0	0	0	0	0
221	f:Clostridiaceae(1.0000),g:Clostridium(1.0000)	f:Clostridiaceae,g:Clostridium (100%)	0	0	0	0	0	0	0	0	0	0	0	0	0	0	0	0	0	0	0	0	0	0	0	0	0	0	0	0	0	0	0	0	0	0	0	0	0	0	0	0	0	0	0	0	0	0	0
223	f:Caulobacteraceae(1.0000),g:Brevundimonas(1.0000)	f:Caulobacteraceae,g:Brevundimonas (100%)	0	0	0	0	0	0	0	0	0	0	0	0	0	14.794	0	0	0	0	0	0	0	0	0	0	0	0	0	0	0	0	0	0	0	0	0	0	0	0	0	0	0	0	0	0	0	0	0
224	f:Comamonadaceae(1.0000),g:Delftia(0.7200)	f:Comamonadaceae,g:Delftia (100%)	0	0	0	0	0	0	0	0	0	0	0	0	41.045	42.5651	0	0	0	0	17.7217	0	0	0	0	0	0	0	0	0	0	0	0	0	0	0	0	0	0	0	0	0	0	0	0	0	0	0	0
225	f:Pseudomonadaceae(1.0000),g:Pseudomonas(1.0000)	f:Pseudomonadaceae,g:Pseudomonas (100%)	0	0	0	0	0	0	0	0	0	15.7413	15.66	0	0	0	0	0	0	0	0	0	0	0	0	0	0	0	0	0	0	0	0	0	0	0	0	0	0	0	0	0	0	0	0	0	0	0	0
226	f:Bacillaceae(1.0000),g:Bacillus(0.9400)	f:Bacillaceae,g:Bacillus (100%)	0	0	0	0	0	0	0	0	0	0	0	0	0	0	0	0	0	0	0	0	0	0	0	0	0	0	0	0	0	0	0	0	0	0	0	0	0	0	0	0	0	0	0	0	0	0	0
227	f:Bacillaceae(0.9800),g:Bacillus(0.9500)	f:Bacillaceae,g:Alkalihalobacillus (100%)	0	0	0	0	0	0	0	0	0	0	0	0	0	0	0	0	0	0	0	0	0	0	0	0	0	0	0	0	0	0	0	0	0	0	0	0	0	0	0	0	0	0	0	0	0	0	0
228	f:Paenibacillaceae(0.9900),g:Paenibacillus(0.9700)	f:Paenibacillaceae,g:Paenibacillus (99.6%)	0	0	0	0	0	0	0	0	0	0	0	0	0	0	0	0	0	0	0	0	0	0	0	0	0	0	0	0	0	0	0	0	0	0	0	0	0	0	0	0	0	0	0	0	0	0	0
229	f:Rhodobiaceae(0.2700),g:Parvibaculum(0.2200)	f:Micropepsaceae,g:Micropepsis (92.063%)	0	0	0	0	0	0	0	0	0	0	0	0	0	0	0	0	0	0	140.41	0	0	0	0	0	0	0	0	0	0	0	0	0	0	0	0	0	0	0	0	0	0	0	0	0	0	0	0
230	f:Pseudomonadaceae(1.0000),g:Pseudomonas(1.0000)	f:Pseudomonadaceae,g:Pseudomonas (100%)	0	0	0	0	0	0	20.3836	23.0338	19.3261	16.0328	14.3816	0	0	0	0	0	0	0	0	0	0	0	0	0	0	0	0	0	0	0	0	0	0	0	0	0	0	0	0	0	0	0	0	0	0	0	0
231	f:Aeromonadaceae(1.0000),g:Aeromonas(1.0000)	f:Aeromonadaceae,g:Aeromonas (100%)	0	0	0	0	0	0	21.1116	15.2321	15.7024	15.4498	16.6187	0	0	0	0	0	0	0	0	0	0	0	0	0	0	0	0	0	0	0	0	0	0	0	0	0	0	0	0	0	0	0	0	0	0	0	0
233	f:Moraxellaceae(1.0000),g:Acinetobacter(1.0000)	f:Moraxellaceae,g:Acinetobacter (100%)	0	0	0	0	0	0	0	0	0	0	0	0	79.2702	0	0	0	0	0	0	0	0	0	0	0	0	0	0	0	0	0	0	0	0	0	0	0	0	0	0	0	0	0	0	0	0	0	0
235	f:Lactobacillaceae(1.0000),g:Lactobacillus(1.0000)	f:Lactobacillaceae,g:Companilactobacillus (100%)	0	0	0	0	0	0	0	0	0	0	0	0	0	0	0	0	0	0	0	14.1026	0	0	0	0	0	13.3113	0	0	0	0	0	0	0	0	0	0	0	0	0	0	0	0	0	0	0	0	0
236	f:Pseudomonadaceae(1.0000),g:Pseudomonas(1.0000)	f:Xanthomonadaceae,g:Stenotrophomonas (100%)	0	0	0	0	0	0	0	0	0	0	0	0	25.0657	34.0002	0	0	0	0	0	0	0	0	0	0	0	0	0	0	0	0	0	0	0	0	0	0	0	0	0	0	0	0	0	0	0	0	0
237	f:Flavobacteriaceae(1.0000),g:Cloacibacterium(1.0000)	f:Weeksellaceae,g:Cloacibacterium (100%)	0	0	0	0	0	0	0	0	0	0	0	0	0	0	0	0	0	0	0	0	0	0	0	82.207	0	0	0	0	0	0	0	0	0	0	0	0	0	0	0	0	0	0	0	0	0	0	0
239	f:Streptococcaceae(1.0000),g:Lactococcus(1.0000)	f:Streptococcaceae,g:Lactococcus (100%)	0	0	0	0	0	0	17.1077	0	0	14.5753	0	0	0	0	0	0	0	0	0	0	0	0	0	0	0	0	0	0	0	0	0	0	0	0	0	0	0	0	0	0	0	0	0	0	0	0	0
240	f:Lactobacillaceae(1.0000),g:Lactobacillus(1.0000)	f:Lactobacillaceae,g:Lactobacillus (100%)	0	0	0	0	0	0	0	0	0	0	0	0	0	0	0	0	0	0	0	0	0	0	0	0	0	0	0	0	0	0	0	0	0	0	0	0	0	0	0	0	0	0	0	0	0	0	0
241	f:Lactobacillaceae(1.0000),g:Lactobacillus(1.0000)	f:Lactobacillaceae,g:Ligilactobacillus (100%)	0	0	0	0	0	0	0	0	0	0	0	53.545	0	0	28.3358	0	0	0	0	0	0	0	0	0	0	0	0	0	0	0	0	0	0	0	0	0	0	0	0	0	0	0	0	0	0	0	0
242	f:Pseudomonadaceae(1.0000),g:Pseudomonas(0.9800)	f:Pseudomonadaceae,g:Pseudomonas (100%)	0	0	0	0	0	0	0	0	0	0	0	0	0	24.1375	0	0	0	0	0	14.4737	0	0	0	0	0	0	0	0	0	0	0	0	0	0	0	0	0	0	0	0	0	0	0	0	0	0	0
243	f:Chitinophagaceae(1.0000),g:Terrimonas(1.0000)	f:Chitinophagaceae,g:Terrimonas (98%)	0	0	0	0	0	0	0	0	0	0	0	0	0	0	0	0	0	0	143.137	0	0	0	0	0	0	0	0	0	0	0	0	0	0	0	0	0	0	0	0	0	0	0	0	0	0	0	0
244	f:Caulobacteraceae(1.0000),g:Brevundimonas(0.9900)	f:Caulobacteraceae,g:Brevundimonas (100%)	0	0	0	0	0	0	0	0	0	0	0	0	0	45.9391	0	0	0	0	0	0	0	0	0	0	0	0	0	0	0	0	0	0	0	0	0	0	0	0	0	0	0	0	0	0	0	0	0
250	f:Paenibacillaceae(1.0000),g:Paenibacillus(1.0000)	f:Paenibacillaceae,g:Paenibacillus (100%)	0	0	0	0	0	0	0	0	0	0	0	0	0	0	0	0	0	0	0	0	0	0	0	0	0	0	0	0	0	0	0	0	0	0	0	0	0	0	14.9028	0	0	0	0	0	0	0	0
251	f:Pseudomonadaceae(1.0000),g:Pseudomonas(0.8100)	f:Pseudomonadaceae,g:Pseudomonas (100%)	0	0	0	0	0	0	0	0	0	0	0	0	0	0	0	0	17.149	0	0	0	0	0	0	0	0	0	0	13.6842	19.027	0	0	0	0	0	0	0	0	0	0	0	0	0	0	0	0	0	0
252	f:Comamonadaceae(0.9700),g:Brachymonas(0.7400)	f:Comamonadaceae,g:Ottowia (100%)	0	0	0	0	0	0	0	0	0	0	0	0	0	0	0	0	0	0	0	0	0	0	0	38.2796	0	0	0	0	0	0	0	0	0	0	0	0	0	0	0	0	0	0	0	0	0	0	0
253	f:Xanthobacteraceae(0.6100),g:Pseudolabrys(0.5900)	f:Hyphomicrobiaceae,g:Rhodoplanes (96.8%)	0	0	0	0	0	0	0	0	0	0	0	0	0	0	0	0	0	0	134.049	0	0	0	0	0	0	0	0	0	0	0	0	0	0	0	0	0	0	0	0	0	0	0	0	0	0	0	0
254	f:Unclassified_Gammaproteobacteria(0.2700),g:Cellvibrio(0.2300)	f:Thioalkalispiraceae,g:Thiohalophilus (92.857%)	0	0	0	0	0	15.7872	0	0	0	0	0	84.2164	15.0394	0	0	0	0	0	0	0	0	0	0	0	0	0	0	0	0	0	0	0	0	0	0	0	0	0	0	0	0	0	0	0	0	0	0
256	f:Enterobacteriaceae(1.0000),g:Serratia(0.5900)	f:Yersiniaceae,g:Serratia (100%)	0	0	0	0	0	0	0	0	0	0	0	0	0	0	0	0	0	0	0	0	0	0	0	0	0	0	0	0	0	0	0	0	0	0	0	0	0	0	0	0	0	0	0	0	0	0	0
258	f:Ectothiorhodospiraceae(0.5100),g:Ectothiorhodospira(0.2100)	f:Ectothiorhodospiraceae,g:Ectothiorhodospira (90.8%)	0	0	0	0	0	0	0	0	0	0	0	0	0	0	0	0	0	0	115.873	0	0	0	0	0	0	0	0	0	0	0	0	0	0	0	0	0	0	0	0	0	0	0	0	0	0	0	0
260	f:Unclassified_Spartobacteria(1.0000),g:Terrimicrobium(1.0000)	f:Terrimicrobiaceae,g:Terrimicrobium (96%)	0	0	0	0	0	0	0	0	0	0	0	0	0	0	0	0	0	0	101.786	0	0	0	0	0	0	0	0	0	0	0	0	0	0	0	0	0	0	0	0	0	0	0	0	0	0	0	0
261	f:Comamonadaceae(0.9800),g:Comamonas(0.5200)	f:Comamonadaceae,g:Comamonas (100%)	0	0	0	0	0	0	0	0	0	0	0	0	0	35.5574	0	0	0	0	0	0	0	0	0	0	0	0	0	0	0	0	0	0	0	0	0	0	0	0	0	0	0	0	0	0	0	0	0
262	f:Leuconostocaceae(1.0000),g:Weissella(1.0000)	f:Lactobacillaceae,g:Weissella (100%)	0	0	0	0	0	0	0	0	0	0	0	0	0	0	0	0	15.3991	0	0	23.0095	0	0	0	0	0	0	0	0	0	0	0	0	0	0	0	0	0	0	0	0	0	0	0	0	0	0	0
263	f:Comamonadaceae(0.9900),g:Comamonas(0.9600)	f:Comamonadaceae,g:Comamonas (100%)	0	0	0	0	0	0	0	0	0	0	0	25.9927	14.0994	18.6871	13.6123	0	0	0	0	0	0	0	0	0	0	0	0	0	0	0	0	0	0	0	0	0	0	0	0	0	0	0	0	0	0	0	0
264	f:Sphingobacteriaceae(0.9000),g:Sphingobacterium(0.9000)	f:Sphingobacteriaceae,g:Sphingobacterium (100%)	0	0	0	0	0	0	0	0	0	0	0	0	0	53.4659	0	0	0	0	0	0	0	0	0	0	0	0	0	0	0	0	0	0	0	0	0	0	0	0	0	0	0	0	0	0	0	0	0
265	f:Oxalobacteraceae(1.0000),g:Duganella(1.0000)	f:Oxalobacteraceae,g:Duganella (100%)	0	0	0	0	0	0	0	17.4611	0	0	0	0	0	0	0	0	0	0	0	0	0	0	0	0	0	0	0	0	0	0	0	0	0	0	0	0	0	0	0	0	0	0	0	0	0	0	0
266	f:Sphingobacteriaceae(1.0000),g:Sphingobacterium(1.0000)	f:Sphingobacteriaceae,g:Sphingobacterium (100%)	0	0	0	0	0	0	0	0	13.6893	16.9073	0	0	0	0	0	0	0	0	0	0	0	0	0	0	0	0	0	0	0	0	0	0	0	0	0	0	0	0	0	0	0	0	0	0	0	0	0
268	f:Paenibacillaceae(0.9900),g:Paenibacillus(0.9900)	f:Paenibacillaceae,g:Paenibacillus (100%)	0	0	0	0	0	20.3706	0	0	0	0	0	0	0	0	0	0	0	0	0	0	0	0	0	0	0	0	0	0	0	0	0	0	0	0	0	0	0	0	0	0	0	0	0	0	0	0	0
269	f:Staphylococcaceae(0.9900),g:Staphylococcus(0.9800)	f:Staphylococcaceae,g:Mammaliicoccus (100%)	0	0	0	0	0	0	0	0	0	0	0	19.2346	0	0	0	0	0	0	0	0	0	0	0	0	0	0	0	0	0	0	0	0	0	0	0	0	0	0	0	0	0	0	0	0	0	0	0
270	f:Bacillaceae(1.0000),g:Bacillus(0.9600)	f:Bacillaceae,g:Robertmurraya (100%)	0	0	0	0	0	0	0	0	0	0	0	0	0	0	0	0	0	0	0	0	0	0	0	0	0	0	0	0	0	0	0	0	0	0	0	0	0	0	0	0	0	0	0	0	0	0	0
271	f:Streptomycetaceae(1.0000),g:Streptomyces(0.9900)	f:Streptomycetaceae,g:Streptomyces (100%)	0	0	0	0	0	0	0	0	0	0	0	0	0	0	0	0	0	0	105.421	0	0	0	0	0	0	0	0	0	0	0	0	0	0	0	0	0	0	0	0	0	0	0	0	0	0	0	0
274	f:Ectothiorhodospiraceae(0.6700),g:Acidiferrobacter(0.6700)	f:Acidiferrobacteraceae,g:Acidiferrobacter (93.6%)	0	0	0	0	0	0	0	0	0	0	0	34.3104	0	16.8703	0	0	0	0	0	0	0	0	0	0	0	0	0	0	0	0	0	0	0	0	0	0	0	0	0	0	0	0	0	0	0	0	0
276	f:Flavobacteriaceae(1.0000),g:Empedobacter(0.5000)	f:Weeksellaceae,g:Empedobacter (96.4%)	0	0	0	0	0	0	0	0	0	0	0	0	0	35.5574	0	0	0	0	0	0	0	0	0	0	0	0	0	0	0	0	0	0	0	0	0	0	0	0	0	0	0	0	0	0	0	0	0
277	f:Flavobacteriaceae(1.0000),g:Chryseobacterium(1.0000)	f:Weeksellaceae,g:Chryseobacterium (100%)	0	0	0	0	0	0	0	0	0	0	0	33.7905	0	17.9085	0	0	0	0	0	0	0	0	0	0	0	0	0	0	0	0	0	0	0	0	0	0	0	0	0	0	0	0	0	0	0	0	0
279	f:Flavobacteriaceae(1.0000),g:Flavobacterium(1.0000)	f:Sphingobacteriaceae,g:Sphingobacterium (100%)	0	0	0	0	0	0	0	0	0	0	0	0	0	16.6108	0	0	0	0	0	0	0	0	0	0	0	0	0	0	0	0	0	0	0	0	0	0	0	0	0	0	0	0	0	0	0	0	0
283	f:Paenibacillaceae(1.0000),g:Paenibacillus(1.0000)	f:Paenibacillaceae,g:Paenibacillus (99.6%)	0	0	0	0	0	0	0	0	0	0	0	0	0	0	0	0	0	0	0	0	0	0	0	0	0	0	0	0	0	0	0	0	0	0	0	0	0	0	0	0	0	0	0	0	0	0	0
284	f:Coxiellaceae(1.0000),g:Diplorickettsia(1.0000)	f:Coxiellaceae,g:Rickettsiella (98%)	0	0	0	0	0	0	0	0	0	0	0	16.6353	0	0	0	0	0	0	0	0	0	0	25.5608	0	0	0	0	0	0	0	0	0	0	0	0	0	0	0	0	0	0	0	0	0	0	0	0
285	f:Flavobacteriaceae(1.0000),g:Flavobacterium(1.0000)	f:Flavobacteriaceae,g:Flavobacterium (100%)	0	0	0	0	0	0	0	0	0	0	0	0	0	0	0	0	0	0	78.6116	0	0	0	0	0	0	0	0	0	0	0	0	0	0	0	0	0	0	0	0	0	0	0	0	0	0	0	0
287	f:Comamonadaceae(0.8500),g:Comamonas(0.7500)	f:Comamonadaceae,g:Comamonas (99.2%)	0	0	0	0	0	0	0	0	14.8972	0	0	0	0	0	0	0	0	0	0	0	0	0	0	0	0	0	0	0	0	0	0	0	0	0	0	0	0	0	0	0	0	0	0	0	0	0	0
289	f:Flavobacteriaceae(1.0000),g:Flavobacterium(1.0000)	f:Flavobacteriaceae,g:Flavobacterium (99.2%)	0	0	0	0	0	0	0	0	0	0	0	0	0	0	0	0	0	0	89.0629	0	0	0	0	0	0	0	0	0	0	0	0	0	0	0	0	0	0	0	0	0	0	0	0	0	0	0	0
290	f:Unclassified_Clostridiales(0.9300),g:Sedimentibacter(0.8400)	f:Unclassified_Clostridiales,g:Sedimentibacter (95.2%)	0	0	0	0	0	0	0	0	0	0	0	0	0	0	0	0	60.8965	0	0	0	0	0	0	0	0	0	0	0	0	0	0	0	0	0	0	0	0	0	0	0	0	0	0	0	0	0	0
291	f:Unclassified_Clostridiales(0.3900),g:Anaerococcus(0.3400)	No similarity found	0	0	0	0	0	13.2409	0	0	0	0	0	55.1046	13.1595	0	0	0	0	0	0	0	0	0	0	0	0	0	0	0	0	0	0	0	0	0	0	0	0	0	0	0	0	0	0	0	0	0	0
293	f:Microbacteriaceae(1.0000),g:Lysinimonas(0.8200)	f:Microbacteriaceae,g:Lysinimonas (100%)	0	0	0	0	0	0	0	0	0	0	0	0	0	0	0	0	0	0	117.69	0	0	0	0	0	0	0	0	0	0	0	0	0	0	0	0	0	0	0	0	0	0	0	0	0	0	0	0
294	f:Succinivibrionaceae(0.1400),g:Anaerobiospirillum(0.1200)	f:Geobacteraceae,g:Geobacter (87.649%)	0	0	0	0	0	0	0	0	0	0	0	66.0215	16.606	0	0	0	0	0	0	0	0	0	0	0	0	0	0	0	0	0	0	0	0	0	0	0	0	0	0	0	0	0	0	0	0	0	0
295	f:Chitinophagaceae(1.0000),g:Ferruginibacter(0.4900)	f:Chitinophagaceae,g:Lacibacter (95.618%)	0	0	0	0	0	0	0	0	0	0	0	0	0	0	0	0	0	0	76.3396	0	0	0	0	0	0	0	0	0	0	0	0	0	0	0	0	0	0	0	0	0	0	0	0	0	0	0	0
296	f:Brucellaceae(0.6200),g:Paenochrobactrum(0.4300)	f:Brucellaceae,g:Paenochrobactrum (98%)	0	0	0	0	0	0	0	0	0	0	0	41.0685	0	22.5803	0	0	0	0	0	0	0	0	0	0	0	0	0	0	0	0	0	0	0	0	0	0	0	0	0	0	0	0	0	0	0	0	0
297	f:Caulobacteraceae(0.9600),g:Brevundimonas(0.9300)	f:Caulobacteraceae,g:Brevundimonas (100%)	0	0	0	0	0	0	0	0	0	0	0	37.9494	0	24.6566	0	0	0	0	0	0	0	0	0	0	0	0	0	0	0	0	0	0	0	0	0	0	0	0	0	0	0	0	0	0	0	0	0
299	f:Flavobacteriaceae(1.0000),g:Flavobacterium(1.0000)	f:Flavobacteriaceae,g:Flavobacterium (99.6%)	0	0	0	0	0	0	0	0	0	0	0	0	0	0	0	0	0	0	86.7909	0	0	0	0	0	0	0	0	0	0	0	0	0	0	0	0	0	0	0	0	0	0	0	0	0	0	0	0
301	f:Xanthobacteraceae(0.4100),g:Pseudolabrys(0.2400)	f:Blastochloridaceae,g:Blastochloris (96.016%)	0	0	0	0	0	0	0	0	0	0	0	0	0	0	0	0	0	0	95.8789	0	0	0	0	0	0	0	0	0	0	0	0	0	0	0	0	0	0	0	0	0	0	0	0	0	0	0	0
302	f:Phyllobacteriaceae(0.9500),g:Aquamicrobium(0.9200)	f:Phyllobacteriaceae,g:Aquamicrobium (100%)	0	0	0	0	0	0	0	0	0	0	0	92.0142	0	0	0	0	0	0	0	0	0	0	0	0	0	0	0	0	0	0	0	0	0	0	0	0	0	0	0	0	0	0	0	0	0	0	0
307	f:Flavobacteriaceae(1.0000),g:Empedobacter(0.4300)	f:Weeksellaceae,g:Empedobacter (96.4%)	0	0	0	0	0	0	0	0	0	0	0	0	0	39.7101	0	0	0	0	0	0	0	0	0	0	0	0	0	0	0	0	0	0	0	0	0	0	0	0	0	0	0	0	0	0	0	0	0
309	f:Sphaerobacteraceae(0.7800),g:Nitrolancea(0.6200)	f:Sphaerobacteraceae,g:Sphaerobacter (85.375%)	0	0	0	0	0	0	0	0	0	0	0	90.4547	0	0	0	0	0	0	0	0	0	0	0	0	0	0	0	0	0	0	0	0	0	0	0	0	0	0	0	0	0	0	0	0	0	0	0
310	f:Microbacteriaceae(1.0000),g:Chryseoglobus(0.5200)	f:Microbacteriaceae,g:Pseudolysinimonas (100%)	0	0	0	0	0	0	0	0	0	0	0	0	0	0	0	0	0	0	87.2453	0	0	0	0	0	0	0	0	0	0	0	0	0	0	0	0	0	0	0	0	0	0	0	0	0	0	0	0
311	f:Sphingomonadaceae(1.0000),g:Sphingobium(0.9800)	f:Sphingomonadaceae,g:Sphingobium (99.2%)	0	0	0	0	0	0	0	0	0	0	0	0	0	0	0	0	0	0	93.6069	0	0	0	0	0	0	0	0	0	0	0	0	0	0	0	0	0	0	0	0	0	0	0	0	0	0	0	0
312	f:Bacillaceae(0.9900),g:Bacillus(0.9800)	f:Bacillaceae,g:Alkalihalobacillus (100%)	0	0	0	0	0	0	0	0	0	0	0	0	0	0	0	0	0	0	0	0	0	0	0	0	0	0	0	0	0	0	0	0	0	0	0	0	0	0	13.8383	0	0	0	0	0	0	0	0
314	f:Lactobacillaceae(0.9800),g:Lactobacillus(0.9800)	f:Lactobacillaceae,g:Lactobacillus (96.4%)	0	0	0	0	0	0	0	0	0	0	15.3404	0	0	0	0	0	0	0	0	0	0	0	0	0	0	0	0	0	0	0	0	0	0	0	0	0	0	0	0	0	0	0	0	0	0	0	0
315	f:Comamonadaceae(0.9900),g:Comamonas(0.8600)	f:Comamonadaceae,g:Comamonas (100%)	0	0	0	0	0	0	0	0	0	0	0	19.7545	0	32.7024	0	0	0	0	0	0	0	0	0	0	0	0	0	0	0	0	0	0	0	0	0	0	0	0	0	0	0	0	0	0	0	0	0
316	f:Sphingobacteriaceae(1.0000),g:Sphingobacterium(0.9900)	f:Sphingobacteriaceae,g:Sphingobacterium (97.6%)	0	0	0	0	0	0	0	0	0	0	0	0	0	35.817	0	0	0	0	0	0	0	0	0	0	0	0	0	0	0	0	0	0	0	0	0	0	0	0	0	0	0	0	0	0	0	0	0
317	f:Burkholderiaceae(1.0000),g:Burkholderia(1.0000)	f:Burkholderiaceae,g:Burkholderia (100%)	0	0	0	0	0	0	0	0	0	0	0	23.9133	0	0	0	0	0	0	0	0	0	0	0	0	0	0	0	0	0	0	0	0	0	0	0	0	0	0	0	0	0	0	0	0	0	0	0
319	f:Planococcaceae(0.6800),g:Kurthia(0.6800)	f:Planococcaceae,g:Kurthia (100%)	0	0	0	0	0	0	0	0	0	0	0	0	0	0	16.9459	0	0	0	0	0	0	0	0	0	0	0	0	0	0	0	0	0	0	0	0	0	0	0	0	0	0	0	0	0	0	0	0
320	f:Lactobacillaceae(1.0000),g:Lactobacillus(1.0000)	f:Lactobacillaceae,g:Secundilactobacillus (100%)	0	0	0	0	0	0	0	0	0	0	14.062	0	0	0	0	0	0	0	0	0	0	0	0	0	0	0	0	0	0	0	0	0	0	0	0	0	0	0	0	0	0	0	0	0	0	0	0
324	f:Unclassified_Bacillales(0.9900),g:Rummeliibacillus(0.9900)	f:Planococcaceae,g:Rummeliibacillus (100%)	0	0	0	0	0	0	0	0	0	0	0	19.2346	0	0	0	0	0	0	0	0	0	0	0	0	0	0	0	0	0	0	0	0	0	0	0	0	0	0	0	0	0	0	0	0	0	0	0
327	f:Alcaligenaceae(0.9900),g:Bordetella(0.8500)	f:Alcaligenaceae,g:Orrella (100%)	0	0	0	0	0	0	0	0	0	0	0	0	15.3527	18.6871	0	0	0	0	0	0	0	0	0	0	0	0	0	0	0	0	0	0	0	0	0	0	0	0	0	0	0	0	0	0	0	0	0
328	f:Clostridiaceae(1.0000),g:Clostridium(1.0000)	f:Clostridiaceae,g:Clostridium (100%)	0	0	0	0	0	0	15.6517	0	16.5077	0	0	0	0	0	0	0	0	0	0	0	0	0	0	0	0	0	0	0	0	0	0	0	0	0	0	0	0	0	0	0	0	0	0	0	0	0	0
329	f:Rhodanobacteraceae(0.9800),g:Dokdonella(0.9700)	f:Rhodanobacteraceae,g:Dokdonella (99.6%)	0	0	0	0	0	0	0	0	0	0	0	0	0	0	0	0	0	0	91.3349	0	0	0	0	0	0	0	0	0	0	0	0	0	0	0	0	0	0	0	0	0	0	0	0	0	0	0	0
331	f:Moraxellaceae(1.0000),g:Acinetobacter(1.0000)	f:Moraxellaceae,g:Acinetobacter (100%)	0	0	0	0	0	0	0	0	0	0	0	0	17.546	0	0	0	0	0	0	0	0	0	0	0	0	0	0	0	0	0	0	0	0	0	0	0	0	0	0	0	0	0	0	0	0	0	0
337	f:Lactobacillaceae(1.0000),g:Lactobacillus(0.9900)	f:Lactobacillaceae,g:Lactobacillus (98.4%)	0	0	0	0	0	0	0	0	0	0	0	0	0	0	0	0	0	0	0	0	0	0	0	0	0	0	0	0	0	0	0	0	0	0	0	0	0	0	0	0	0	0	0	0	0	0	0
338	f:Lysobacteraceae(1.0000),g:Luteimonas(0.8900)	f:Xanthomonadaceae,g:Lysobacter (99.6%)	0	0	0	0	0	0	0	0	0	0	0	0	0	0	0	0	0	0	68.6148	0	0	0	0	0	0	0	0	0	0	0	0	0	0	0	0	0	0	0	0	0	0	0	0	0	0	0	0
341	f:Clostridiaceae(1.0000),g:Clostridium(0.9400)	f:Lachnospiraceae,g:Lacrimispora (99.2%)	0	0	0	0	0	0	0	0	0	0	0	0	0	0	0	0	0	0	0	0	0	0	0	0	0	0	0	0	0	0	0	0	0	0	0	0	0	0	0	0	0	0	0	0	0	0	0
344	f:Microbacteriaceae(0.9700),g:Leucobacter(0.8000)	f:Microbacteriaceae,g:Leucobacter (99.6%)	0	0	0	0	0	0	0	0	0	0	0	0	0	0	0	0	0	0	0	0	0	0	0	0	0	0	0	0	0	0	0	0	0	0	0	0	0	0	0	0	0	0	0	0	0	0	0
347	f:Hyphomicrobiaceae(0.9500),g:Devosia(0.9500)	f:Devosiaceae,g:Devosia (100%)	0	0	0	0	0	0	0	0	0	0	0	0	0	0	0	0	0	0	71.7956	0	0	0	0	0	0	0	0	0	0	0	0	0	0	0	0	0	0	0	0	0	0	0	0	0	0	0	0
352	f:Microbacteriaceae(0.9700),g:Leucobacter(0.7900)	f:Microbacteriaceae,g:Leucobacter (100%)	0	0	0	0	0	0	0	0	0	0	0	0	0	0	0	0	0	0	0	0	0	0	0	0	0	0	0	0	0	0	0	0	0	0	0	0	0	0	0	0	0	0	0	0	0	0	0
355	f:Sphingobacteriaceae(0.7700),g:Sphingobacterium(0.7500)	f:Sphingobacteriaceae,g:Sphingobacterium (94%)	0	0	0	0	0	0	0	0	0	0	0	0	0	27.252	0	0	0	0	0	0	0	0	0	0	0	0	0	0	0	0	0	0	0	0	0	0	0	0	0	0	0	0	0	0	0	0	0
357	f:Lactobacillaceae(1.0000),g:Lactobacillus(1.0000)	f:Lactobacillaceae,g:Companilactobacillus (97.6%)	0	0	0	0	0	0	0	0	0	0	0	0	0	0	0	0	0	0	0	0	0	0	0	0	0	0	0	0	0	0	0	0	0	0	0	0	0	0	0	0	0	0	0	0	0	0	0
360	f:Erythrobacteraceae(0.3100),g:Altererythrobacter(0.2800)	f:Paracoccaceae,g:Albimonas (86.166%)	0	0	0	0	0	0	0	0	0	0	0	0	0	0	0	0	0	0	81.7924	0	0	0	0	0	0	0	0	0	0	0	0	0	0	0	0	0	0	0	0	0	0	0	0	0	0	0	0
361	f:Methylophilaceae(0.9900),g:Methylobacillus(0.9300)	f:Methylophilaceae,g:Methylobacillus (98.8%)	0	0	0	0	0	0	0	0	0	0	0	0	0	33.2215	0	0	0	0	0	0	0	0	0	0	0	0	0	0	0	0	0	0	0	0	0	0	0	0	0	0	0	0	0	0	0	0	0
362	f:Ruminococcaceae(0.8600),g:Intestinimonas(0.8600)	f:Ruminococcaceae,g:Intestinimonas (98.4%)	0	0	0	0	0	0	0	0	0	0	0	0	0	0	0	0	0	0	0	0	0	0	0	0	0	0	0	0	0	0	0	0	0	0	0	0	0	0	0	0	0	0	0	0	0	0	0
363	f:Staphylococcaceae(0.9900),g:Staphylococcus(0.9100)	f:Staphylococcaceae,g:Mammaliicoccus (100%)	0	0	0	0	0	0	0	0	0	0	0	26.5126	0	0	0	0	0	0	0	0	0	0	0	0	0	0	0	0	0	0	0	0	0	0	0	0	0	0	0	0	0	0	0	0	0	0	0
364	f:Chitinophagaceae(0.4100),g:Hydrotalea(0.1300)	f:Haliscomenobacteraceae,g:Haliscomenobacter (87.251%)	0	0	0	0	0	0	0	0	0	0	0	0	0	0	0	0	0	0	66.7972	0	0	0	0	0	0	0	0	0	0	0	0	0	0	0	0	0	0	0	0	0	0	0	0	0	0	0	0
368	f:Bacillaceae(0.9500),g:Bacillus(0.3000)	f:Bacillaceae,g:Terrihalobacillus (96.8%)	0	0	0	0	0	45.3246	0	0	0	0	0	0	0	0	0	0	0	0	0	0	0	0	0	0	0	0	0	0	0	0	0	0	0	0	0	0	0	0	0	0	0	0	0	0	0	0	0
369	f:Sphingomonadaceae(0.9800),g:Sphingopyxis(0.8300)	f:Sphingomonadaceae,g:Sphingopyxis (100%)	0	0	0	0	0	0	0	0	0	0	0	0	0	0	0	0	0	0	68.6148	0	0	0	0	0	0	0	0	0	0	0	0	0	0	0	0	0	0	0	0	0	0	0	0	0	0	0	0
373	f:Saprospiraceae(0.7500),g:Lewinella(0.3800)	f:Lewinellaceae,g:Flavilitoribacter (90.438%)	0	0	0	0	0	0	0	0	0	0	0	0	0	0	0	0	0	0	52.7107	0	0	0	0	0	0	0	0	0	0	0	0	0	0	0	0	0	0	0	0	0	0	0	0	0	0	0	0
374	f:Hyphomicrobiaceae(0.9500),g:Devosia(0.7600)	f:Devosiaceae,g:Pelagibacterium (100%)	0	0	0	0	0	0	0	0	0	0	0	60.3031	0	0	0	0	0	0	0	0	0	0	0	0	0	0	0	0	0	0	0	0	0	0	0	0	0	0	0	0	0	0	0	0	0	0	0
375	f:Hyphomicrobiaceae(0.8200),g:Devosia(0.8100)	f:Devosiaceae,g:Devosia (99.2%)	0	0	0	0	0	0	0	0	0	0	0	0	0	0	0	0	0	0	53.6195	0	0	0	0	0	0	0	0	0	0	0	0	0	0	0	0	0	0	0	0	0	0	0	0	0	0	0	0
376	f:Lysobacteraceae(0.8900),g:Xanthomonas(0.3500)	f:Xanthomonadaceae,g:Xanthomonas (98%)	0	0	0	0	0	0	0	0	0	0	0	16.6353	0	0	0	0	0	0	0	0	0	0	0	0	0	0	0	0	0	0	0	0	0	0	0	0	0	0	0	0	0	0	0	0	0	0	0
377	f:Microbacteriaceae(0.9900),g:Cryobacterium(0.4600)	f:Microbacteriaceae,g:Cryobacterium (100%)	0	0	0	0	0	0	0	0	0	0	0	0	0	0	0	0	0	0	65.434	0	0	0	0	0	0	0	0	0	0	0	0	0	0	0	0	0	0	0	0	0	0	0	0	0	0	0	0
380	f:Rhodospirillaceae(0.5800),g:Methylobacterium(0.1400)	f:Rhodospirillaceae,g:Hypericibacter (87.6%)	0	0	0	0	0	0	0	0	0	0	0	0	0	0	0	0	0	0	0	0	0	0	14.5232	0	0	0	0	0	0	0	0	0	0	0	0	0	0	0	0	0	0	0	0	0	0	0	0
382	f:Chitinophagaceae(0.7000),g:Taibaiella(0.3100)	f:Chitinophagaceae,g:Edaphocola (92.857%)	0	0	0	0	0	0	0	0	0	0	0	0	0	0	0	0	0	0	54.0739	0	0	0	0	0	0	0	0	0	0	0	0	0	0	0	0	0	0	0	0	0	0	0	0	0	0	0	0
383	f:Flavobacteriaceae(1.0000),g:Flavobacterium(1.0000)	f:Flavobacteriaceae,g:Flavobacterium (100%)	0	0	0	0	0	0	0	0	0	0	0	0	0	0	0	0	0	0	20.9025	0	0	0	0	0	0	0	0	0	0	0	0	0	0	0	0	0	0	0	0	0	0	0	0	0	0	0	0
385	f:Bradymonadaceae(0.2200),g:Bradymonas(0.2200)	f:Lujinxingiaceae,g:Lujinxingia (92.46%)	0	0	0	0	0	0	0	0	0	0	0	61.3428	0	0	0	0	0	0	0	0	0	0	0	0	0	0	0	0	0	0	0	0	0	0	0	0	0	0	0	0	0	0	0	0	0	0	0
389	f:Microbacteriaceae(0.9900),g:Gulosibacter(0.2600)	f:Microbacteriaceae,g:Gulosibacter (98.4%)	0	0	0	0	0	0	0	0	0	0	0	54.0649	0	0	0	0	0	0	0	0	0	0	0	0	0	0	0	0	0	0	0	0	0	0	0	0	0	0	0	0	0	0	0	0	0	0	0
394	f:Flavobacteriaceae(1.0000),g:Chryseobacterium(1.0000)	f:Weeksellaceae,g:Epilithonimonas (100%)	0	0	0	0	0	0	0	0	0	0	0	0	0	0	0	0	0	0	0	0	0	0	48.217	0	0	0	0	0	0	0	0	0	0	0	0	0	0	0	0	0	0	0	0	0	0	0	0
398	f:Gemmatimonadaceae(0.3200),g:Gemmatimonas(0.3200)	f:Gemmatimonadaceae,g:Gemmatimonas (88.492%)	0	0	0	0	0	0	0	0	0	0	0	0	0	0	0	0	0	0	42.2594	0	0	0	0	0	0	0	0	0	0	0	0	0	0	0	0	0	0	0	0	0	0	0	0	0	0	0	0
399	f:Rhizobiaceae(0.8200),g:Neorhizobium(0.8100)	f:Rhizobiaceae,g:Agrobacterium (100%)	0	0	0	0	0	0	0	0	0	0	0	0	19.1126	0	0	0	0	0	0	0	0	0	0	0	0	0	0	0	0	0	0	0	0	0	0	0	0	0	0	0	0	0	0	0	0	0	0
401	f:Marinilabiliaceae(0.5600),g:Carboxylicivirga(0.5400)	f:Marinilabiliaceae,g:Alkalitalea (89.6%)	0	0	0	0	0	0	0	0	0	0	0	0	0	21.5421	0	0	0	0	0	0	0	0	0	0	0	0	0	0	0	0	0	0	0	0	0	0	0	0	0	0	0	0	0	0	0	0	0
403	f:Syntrophaceae(0.2200),g:Desulfomonile(0.2000)	f:Syntrophaceae,g:Syntrophus (86.454%)	0	0	0	0	0	0	0	0	0	0	0	0	0	0	0	0	0	0	47.2579	0	0	0	0	0	0	0	0	0	0	0	0	0	0	0	0	0	0	0	0	0	0	0	0	0	0	0	0
404	f:Comamonadaceae(0.9000),g:Acidovorax(0.8300)	f:Comamonadaceae,g:Acidovorax (100%)	0	0	0	0	0	0	0	0	0	0	0	0	0	0	0	0	0	0	19.5393	0	0	0	0	0	0	0	0	0	0	0	0	0	0	0	0	0	0	0	0	0	0	0	0	0	0	0	0
405	f:Alcaligenaceae(1.0000),g:Alcaligenes(0.9700)	f:Alcaligenaceae,g:Alcaligenes (100%)	0	0	0	0	0	0	0	0	0	0	0	15.0758	0	0	0	0	0	0	0	0	0	0	0	0	0	0	0	0	0	0	0	0	0	0	0	0	0	0	0	0	0	0	0	0	0	0	0
406	f:Ectothiorhodospiraceae(0.5000),g:Ectothiorhodospira(0.2000)	f:Ectothiorhodospiraceae,g:Ectothiorhodospira (90.8%)	0	0	0	0	0	0	0	0	0	0	0	0	0	0	0	0	0	0	49.5299	0	0	0	0	0	0	0	0	0	0	0	0	0	0	0	0	0	0	0	0	0	0	0	0	0	0	0	0
407	f:Moraxellaceae(1.0000),g:Acinetobacter(1.0000)	f:Moraxellaceae,g:Acinetobacter (100%)	0	0	0	0	0	0	0	0	0	0	0	0	0	0	0	0	0	0	0	0	0	0	0	13.1782	0	0	0	0	0	0	0	0	0	0	0	0	0	0	0	0	0	0	0	0	0	0	0
414	f:Bacillaceae(0.8000),g:Bacillus(0.5300)	f:Bacillaceae,g:Lysinibacillus (100%)	0	0	0	0	0	0	0	0	0	0	0	24.4332	0	0	0	0	0	0	0	0	0	0	0	0	0	0	0	0	0	0	0	0	0	0	0	0	0	0	0	0	0	0	0	0	0	0	0
421	f:Microbacteriaceae(1.0000),g:Leucobacter(0.9100)	f:Microbacteriaceae,g:Leucobacter (99.6%)	0	0	0	0	0	0	0	0	0	0	0	41.0685	0	0	0	0	0	0	0	0	0	0	0	0	0	0	0	0	0	0	0	0	0	0	0	0	0	0	0	0	0	0	0	0	0	0	0
424	f:Phyllobacteriaceae(1.0000),g:Chelativorans(1.0000)	f:Phyllobacteriaceae,g:Chelativorans (100%)	0	0	0	0	0	0	0	0	0	0	0	0	0	0	0	0	0	0	45.4402	0	0	0	0	0	0	0	0	0	0	0	0	0	0	0	0	0	0	0	0	0	0	0	0	0	0	0	0
425	f:Rhizobiaceae(0.8300),g:Rhizobium(0.8300)	f:Rhizobiaceae,g:Mycoplana (100%)	0	0	0	0	0	0	0	0	0	0	0	0	0	0	0	0	0	0	18.1761	0	0	0	0	33.2593	0	0	0	0	0	0	0	0	0	0	0	0	0	0	0	0	0	0	0	0	0	0	0
427	f:Gemmatimonadaceae(0.9400),g:Gemmatimonas(0.9400)	f:Gemmatimonadaceae,g:Gemmatimonas (90.4%)	0	0	0	0	0	0	0	0	0	0	0	0	0	0	0	0	0	0	22.7201	0	0	0	0	0	0	0	0	0	0	0	0	0	0	0	0	0	0	0	0	0	0	0	0	0	0	0	0
431	f:Hyphomicrobiaceae(1.0000),g:Devosia(1.0000)	f:Devosiaceae,g:Devosia (98.4%)	0	0	0	0	0	0	0	0	0	0	0	0	0	0	0	0	0	0	0	0	13.4645	0	0	19.4536	0	0	0	0	0	0	0	0	0	0	0	0	0	0	0	0	0	0	0	0	0	0	0
433	f:Sphaerobacteraceae(0.5000),g:Nitrolancea(0.3800)	f:Sphaerobacteraceae,g:Sphaerobacter (86.905%)	0	0	0	0	0	0	0	0	0	0	0	0	0	0	0	0	0	0	0	0	0	0	16.266	0	0	0	0	0	0	0	0	0	0	0	0	0	0	0	0	0	0	0	0	0	0	0	0
434	f:Planococcaceae(0.6800),g:Ureibacillus(0.6800)	f:Planococcaceae,g:Ureibacillus (99.6%)	0	0	0	0	0	0	0	0	0	0	0	46.267	0	0	0	0	0	0	0	0	0	0	0	0	0	0	0	0	0	0	0	0	0	0	0	0	0	0	0	0	0	0	0	0	0	0	0
439	f:Caulobacteraceae(1.0000),g:Caulobacter(1.0000)	f:Caulobacteraceae,g:Caulobacter (99.2%)	0	0	0	0	0	0	0	0	0	0	0	0	0	0	0	0	0	0	17.2673	0	0	0	0	0	0	0	0	0	0	0	0	0	0	0	0	0	0	0	0	0	0	0	0	0	0	0	0
440	f:Actinomycetaceae(0.9500),g:Actinomyces(0.9500)	f:Actinomycetaceae,g:Actinomyces (97.6%)	0	0	0	0	0	0	0	0	0	0	0	26.5126	0	0	0	0	0	0	0	0	0	0	0	0	0	0	0	0	0	0	0	0	0	0	0	0	0	0	0	0	0	0	0	0	0	0	0
441	f:Desulfobacteraceae(0.1500),g:Corynebacterium(0.0500)	f:Actinomycetaceae,g:Actinomyces (97.6%)	0	0	0	0	0	0	0	0	0	0	0	0	0	0	0	0	0	0	34.989	0	0	0	0	0	0	0	0	0	0	0	0	0	0	0	0	0	0	0	0	0	0	0	0	0	0	0	0
443	f:Hyphomicrobiaceae(0.7400),g:Devosia(0.7400)	f:Devosiaceae,g:Devosia (100%)	0	0	0	0	0	0	0	0	0	0	0	0	0	0	0	0	0	0	15.4497	0	0	0	0	0	0	0	0	0	0	0	0	0	0	0	0	0	0	0	0	0	0	0	0	0	0	0	0
444	f:Hyphomicrobiaceae(1.0000),g:Devosia(1.0000)	f:Devosiaceae,g:Devosia (100%)	0	0	0	0	0	0	0	0	0	0	0	49.906	0	0	0	0	0	0	0	0	0	0	0	0	0	0	0	0	0	0	0	0	0	0	0	0	0	0	0	0	0	0	0	0	0	0	0
446	f:Pseudomonadaceae(1.0000),g:Pseudomonas(1.0000)	f:Pseudomonadaceae,g:Pseudomonas (100%)	0	0	0	0	0	0	0	0	0	0	0	35.3501	0	0	0	0	0	0	0	0	0	0	0	0	0	0	0	0	0	0	0	0	0	0	0	0	0	0	0	0	0	0	0	0	0	0	0
448	f:Caulobacteraceae(1.0000),g:Brevundimonas(1.0000)	f:Caulobacteraceae,g:Brevundimonas (100%)	0	0	0	0	0	0	0	0	0	0	0	0	0	19.2062	0	0	0	0	0	0	0	0	0	0	0	0	0	0	0	0	0	0	0	0	0	0	0	0	0	0	0	0	0	0	0	0	0
451	f:Unclassified_Oceanospirillales(0.2000),g:Salicola(0.2000)	f:Ectothiorhodospiraceae,g:Spiribacter (92%)	0	0	0	0	0	0	0	0	0	0	0	0	0	0	0	0	0	0	49.0755	0	0	0	0	0	0	0	0	0	0	0	0	0	0	0	0	0	0	0	0	0	0	0	0	0	0	0	0
452	f:Unclassified_Elusimicrobia(1.0000),g:Aridibacter(1.0000)	f:Blastocatellaceae,g:Stenotrophobacter (97.2%)	0	0	0	0	0	0	0	0	0	0	0	0	0	0	0	0	0	0	43.1682	0	0	0	0	0	0	0	0	0	0	0	0	0	0	0	0	0	0	0	0	0	0	0	0	0	0	0	0
453	f:Nitrososphaeraceae(1.0000),g:Nitrososphaera(1.0000)	f:Nitrososphaeraceae,g:Nitrososphaera (95.6%)	0	0	0	0	0	0	0	0	0	0	0	0	0	0	0	0	0	0	41.805	0	0	0	0	0	0	0	0	0	0	0	0	0	0	0	0	0	0	0	0	0	0	0	0	0	0	0	0
456	f:Hyphomicrobiaceae(0.9200),g:Hyphomicrobium(0.5800)	f:Hyphomicrobiaceae,g:Hyphomicrobium (96.4%)	0	0	0	0	0	0	0	0	0	0	0	0	0	0	0	0	0	0	41.3506	0	0	0	0	0	0	0	0	0	0	0	0	0	0	0	0	0	0	0	0	0	0	0	0	0	0	0	0
458	f:Unclassified_Alphaproteobacteria(0.8200),g:Rhizomicrobium(0.8200)	f:Micropepsaceae,g:Rhizomicrobium (93.6%)	0	0	0	0	0	0	0	0	0	0	0	0	0	0	0	0	0	0	34.989	0	0	0	0	0	0	0	0	0	0	0	0	0	0	0	0	0	0	0	0	0	0	0	0	0	0	0	0
461	f:Phyllobacteriaceae(0.9900),g:Aquamicrobium(0.9600)	f:Phyllobacteriaceae,g:Aquamicrobium (100%)	0	0	0	0	0	0	0	0	0	0	0	0	14.4128	0	0	0	0	0	0	0	0	0	0	0	0	0	0	0	0	0	0	0	0	0	0	0	0	0	0	0	0	0	0	0	0	0	0
464	f:Lysobacteraceae(0.2500),g:Ignatzschineria(0.2500)	f:Thioalkalispiraceae,g:Thioalkalispira (92.4%)	0	0	0	0	0	0	0	0	0	0	0	14.5559	0	0	0	0	0	0	0	0	0	0	0	0	0	0	0	0	0	0	0	0	0	0	0	0	0	0	0	0	0	0	0	0	0	0	0
466	f:Microbacteriaceae(0.9200),g:Leucobacter(0.8500)	f:Microbacteriaceae,g:Leucobacter (99.6%)	0	0	0	0	0	0	0	0	0	0	0	14.5559	0	0	0	0	0	0	0	0	0	0	0	0	0	0	0	0	0	0	0	0	0	0	0	0	0	0	0	0	0	0	0	0	0	0	0
481	f:Flavobacteriaceae(1.0000),g:Flavobacterium(1.0000)	f:Flavobacteriaceae,g:Flavobacterium (98.8%)	0	0	0	0	0	0	0	0	0	0	0	0	0	0	0	0	0	0	24.0833	0	0	0	0	0	0	0	0	0	0	0	0	0	0	0	0	0	0	0	0	0	0	0	0	0	0	0	0
482	f:Clostridiaceae(1.0000),g:Clostridium(1.0000)	f:Lachnospiraceae,g:Lacrimispora (100%)	0	0	0	0	0	0	0	0	0	0	0	0	0	0	0	0	0	0	0	0	0	0	0	0	0	0	0	0	0	0	0	0	0	0	0	0	0	0	0	0	0	0	0	0	0	0	0
486	f:Pseudomonadaceae(1.0000),g:Pseudomonas(0.9600)	f:Pseudomonadaceae,g:Stutzerimonas (100%)	0	0	0	0	0	0	0	0	0	0	0	0	0	0	0	0	0	0	0	0	0	0	0	13.1782	0	0	0	0	0	0	0	0	0	0	0	0	0	0	0	0	0	0	0	0	0	0	0
491	f:Rhodocyclaceae(0.9900),g:Azoarcus(0.4700)	f:Sterolibacteriaceae,g:Georgfuchsia (99.2%)	0	0	0	0	0	0	0	0	0	0	0	0	0	0	0	0	0	0	26.3553	0	0	0	0	0	0	0	0	0	0	0	0	0	0	0	0	0	0	0	0	0	0	0	0	0	0	0	0
499	f:Rhodobacteraceae(0.9600),g:Paracoccus(0.9100)	f:Paracoccaceae,g:Paracoccus (100%)	0	0	0	0	0	0	0	0	0	0	0	31.1913	0	0	0	0	0	0	0	0	0	0	0	0	0	0	0	0	0	0	0	0	0	0	0	0	0	0	0	0	0	0	0	0	0	0	0
500	f:Ectothiorhodospiraceae(0.5500),g:Ectothiorhodospira(0.3400)	f:Ectothiorhodospiraceae,g:Ectothiorhodospira (89.6%)	0	0	0	0	0	0	0	0	0	0	0	0	0	0	0	0	0	0	34.0802	0	0	0	0	0	0	0	0	0	0	0	0	0	0	0	0	0	0	0	0	0	0	0	0	0	0	0	0
501	f:Acholeplasmataceae(0.1200),g:Acholeplasma(0.1200)	f:Candidatus Chromulinivoraceae,g:Candidatus Chromulinivorax (85.6%)	0	0	0	0	0	0	0	0	0	0	0	0	0	0	0	0	0	0	32.2626	0	0	0	0	0	0	0	0	0	0	0	0	0	0	0	0	0	0	0	0	0	0	0	0	0	0	0	0
509	f:Paenibacillaceae(0.9600),g:Aneurinibacillus(0.9600)	f:Paenibacillaceae,g:Aneurinibacillus (100%)	0	0	0	0	0	0	0	0	0	0	0	30.1516	0	0	0	0	0	0	0	0	0	0	0	0	0	0	0	0	0	0	0	0	0	0	0	0	0	0	0	0	0	0	0	0	0	0	0
518	f:Chitinophagaceae(1.0000),g:Ferruginibacter(0.4400)	f:Chitinophagaceae,g:Lacibacter (96.016%)	0	0	0	0	0	0	0	0	0	0	0	0	0	0	0	0	0	0	33.6258	0	0	0	0	0	0	0	0	0	0	0	0	0	0	0	0	0	0	0	0	0	0	0	0	0	0	0	0
519	f:Dehalococcoidaceae(0.1200),g:Dehalogenimonas(0.1200)	f:Tepidiformaceae,g:Tepidiforma (93.6%)	0	0	0	0	0	0	0	0	0	0	0	0	0	0	0	0	0	0	32.2626	0	0	0	0	0	0	0	0	0	0	0	0	0	0	0	0	0	0	0	0	0	0	0	0	0	0	0	0
524	f:Iamiaceae(1.0000),g:Aquihabitans(1.0000)	f:Iamiaceae,g:Aquihabitans (96.414%)	0	0	0	0	0	0	0	0	0	0	0	33.7905	0	0	0	0	0	0	0	0	0	0	0	0	0	0	0	0	0	0	0	0	0	0	0	0	0	0	0	0	0	0	0	0	0	0	0
528	f:Nocardioidaceae(1.0000),g:Marmoricola(1.0000)	f:Nocardioidaceae,g:Marmoricola (100%)	0	0	0	0	0	0	0	0	0	0	0	0	0	0	0	0	0	0	0	0	0	0	19.1706	0	0	0	0	0	0	0	0	0	0	0	0	0	0	0	0	0	0	0	0	0	0	0	0
531	f:Brevibacteriaceae(1.0000),g:Brevibacterium(1.0000)	f:Brevibacteriaceae,g:Brevibacterium (100%)	0	0	0	0	0	30.5559	0	0	0	0	0	0	0	0	0	0	0	0	0	0	0	0	0	0	0	0	0	0	0	0	0	0	0	0	0	0	0	0	0	0	0	0	0	0	0	0	0
533	f:Mycoplasmataceae(0.0900),g:Mycoplasma(0.0900)	f:Peronosporaceae,g:Phytophthora (96%)	0	0	0	0	0	0	0	0	0	0	0	0	0	0	0	0	0	0	24.5377	0	0	0	0	0	0	0	0	0	0	0	0	0	0	0	0	0	0	0	0	0	0	0	0	0	0	0	0
536	f:Phyllobacteriaceae(0.9800),g:Aquamicrobium(0.9700)	f:Phyllobacteriaceae,g:Aquamicrobium (100%)	0	0	0	0	0	0	0	0	0	0	0	29.6317	0	0	0	0	0	0	0	0	0	0	0	0	0	0	0	0	0	0	0	0	0	0	0	0	0	0	0	0	0	0	0	0	0	0	0
542	f:Micrococcaceae(1.0000),g:Arthrobacter(1.0000)	f:Micrococcaceae,g:Paenarthrobacter (100%)	0	0	0	0	0	0	0	0	0	0	0	0	0	0	0	0	0	0	22.7201	0	0	0	0	0	0	0	0	0	0	0	0	0	0	0	0	0	0	0	0	0	0	0	0	0	0	0	0
543	f:Cellulomonadaceae(0.8700),g:Actinotalea(0.8700)	f:Cellulomonadaceae,g:Actinotalea (97.2%)	0	0	0	0	0	0	0	0	0	0	0	40.0288	0	0	0	0	0	0	0	0	0	0	0	0	0	0	0	0	0	0	0	0	0	0	0	0	0	0	0	0	0	0	0	0	0	0	0
546	f:Chitinophagaceae(1.0000),g:Sediminibacterium(0.9800)	f:Chitinophagaceae,g:Sediminibacterium (99.6%)	0	0	0	0	0	0	0	0	0	0	0	0	0	0	0	0	0	0	26.3553	0	0	0	0	0	0	0	0	0	0	0	0	0	0	0	0	0	0	0	0	0	0	0	0	0	0	0	0
550	f:Rhodobiaceae(0.2800),g:Anderseniella(0.2400)	f:,g: Nordella (96.8%)	0	0	0	0	0	0	0	0	0	0	0	0	0	0	0	0	0	0	25.4465	0	0	0	0	0	0	0	0	0	0	0	0	0	0	0	0	0	0	0	0	0	0	0	0	0	0	0	0
552	f:Unclassified_Clostridiales(1.0000),g:Sedimentibacter(1.0000)	f:Unclassified_Clostridiales,g:Sedimentibacter (97.2%)	0	0	0	0	0	0	0	0	0	0	0	0	0	0	0	0	0	0	0	0	0	0	0	0	0	0	0	0	0	0	0	0	0	0	0	0	0	0	0	0	0	0	0	0	0	0	0
558	f:Flavobacteriaceae(1.0000),g:Cloacibacterium(1.0000)	f:Weeksellaceae,g:Cloacibacterium (99.6%)	0	0	0	0	0	0	0	0	0	0	0	0	0	0	0	0	0	0	0	0	0	0	0	33.8869	0	0	0	0	0	0	0	0	0	0	0	0	0	0	0	0	0	0	0	0	0	0	0
560	f:Hyphomicrobiaceae(1.0000),g:Hyphomicrobium(1.0000)	f:Hyphomicrobiaceae,g:Hyphomicrobium (99.2%)	0	0	0	0	0	0	0	0	0	0	0	0	0	0	0	0	0	0	27.7186	0	0	0	0	0	0	0	0	0	0	0	0	0	0	0	0	0	0	0	0	0	0	0	0	0	0	0	0
561	f:Microbacteriaceae(0.9600),g:Leucobacter(0.9000)	f:Microbacteriaceae,g:Leucobacter (99.6%)	0	0	0	0	0	0	0	0	0	0	0	29.6317	0	0	0	0	0	0	0	0	0	0	0	0	0	0	0	0	0	0	0	0	0	0	0	0	0	0	0	0	0	0	0	0	0	0	0
562	f:Chitinophagaceae(1.0000),g:Parasegetibacter(0.4500)	f:Chitinophagaceae,g:Agriterribacter (97.6%)	0	0	0	0	0	0	0	0	0	0	0	0	0	0	0	0	0	0	30.445	0	0	0	0	0	0	0	0	0	0	0	0	0	0	0	0	0	0	0	0	0	0	0	0	0	0	0	0
568	f:Streptomycetaceae(1.0000),g:Streptomyces(0.9700)	f:Streptomycetaceae,g:Streptomyces (100%)	0	0	0	0	0	0	0	0	0	0	0	0	0	0	0	0	0	0	31.3538	0	0	0	0	0	0	0	0	0	0	0	0	0	0	0	0	0	0	0	0	0	0	0	0	0	0	0	0
569	f:Caulobacteraceae(1.0000),g:Asticcacaulis(1.0000)	f:Caulobacteraceae,g:Asticcacaulis (100%)	0	0	0	0	0	0	0	0	0	0	0	0	0	0	0	0	0	0	34.0802	0	0	0	0	0	0	0	0	0	0	0	0	0	0	0	0	0	0	0	0	0	0	0	0	0	0	0	0
570	f:Chitinophagaceae(1.0000),g:Flavihumibacter(0.9100)	f:Chitinophagaceae,g:Flavihumibacter (99.2%)	0	0	0	0	0	0	0	0	0	0	0	0	0	0	0	0	0	0	25.9009	0	0	0	0	0	0	0	0	0	0	0	0	0	0	0	0	0	0	0	0	0	0	0	0	0	0	0	0
571	f:Phyllobacteriaceae(0.9300),g:Aquamicrobium(0.4700)	f:Phyllobacteriaceae,g:Corticibacterium (98.4%)	0	0	0	0	0	0	0	0	0	0	0	0	0	0	0	0	0	0	26.8097	0	0	0	0	0	0	0	0	0	0	0	0	0	0	0	0	0	0	0	0	0	0	0	0	0	0	0	0
574	f:Microbacteriaceae(1.0000),g:Salinibacterium(0.3500)	f:Microbacteriaceae,g:Salinibacterium (100%)	0	0	0	0	0	0	0	0	0	0	0	0	0	0	0	0	0	0	31.3538	0	0	0	0	0	0	0	0	0	0	0	0	0	0	0	0	0	0	0	0	0	0	0	0	0	0	0	0
577	f:Sanguibacteraceae(0.6700),g:Sanguibacter(0.6700)	f:Jonesiaceae,g:Flavimobilis (100%)	0	0	0	0	0	0	0	0	0	0	0	27.5523	0	0	0	0	0	0	0	0	0	0	0	0	0	0	0	0	0	0	0	0	0	0	0	0	0	0	0	0	0	0	0	0	0	0	0
578	f:Nitrososphaeraceae(0.4400),g:Nitrososphaera(0.4400)	f:Nitrosopumilaceae,g:Nitrosopumilus (92.8%)	0	0	0	0	0	0	0	0	0	0	0	0	0	0	0	0	0	0	32.2626	0	0	0	0	0	0	0	0	0	0	0	0	0	0	0	0	0	0	0	0	0	0	0	0	0	0	0	0
592	f:Planococcaceae(0.6800),g:Ureibacillus(0.6800)	f:Planococcaceae,g:Ureibacillus (100%)	0	0	0	0	0	0	0	0	0	0	0	28.0721	0	0	0	0	0	0	0	0	0	0	0	0	0	0	0	0	0	0	0	0	0	0	0	0	0	0	0	0	0	0	0	0	0	0	0
593	f:Rhizobiaceae(0.9900),g:Rhizobium(0.9900)	f:Rhizobiaceae,g:Rhizobium (100%)	0	0	0	0	0	0	0	0	0	0	0	0	0	0	0	0	0	0	25.9009	0	0	0	0	0	0	0	0	0	0	0	0	0	0	0	0	0	0	0	0	0	0	0	0	0	0	0	0
606	f:Clostridiaceae(1.0000),g:Clostridium(1.0000)	f:Clostridiaceae,g:Clostridium (100%)	0	0	0	0	0	0	0	0	0	0	0	0	0	0	0	0	0	0	0	0	0	0	0	0	0	0	0	0	0	0	0	0	0	0	0	0	0	0	0	0	0	0	0	0	0	0	0
611	f:Flavobacteriaceae(1.0000),g:Chryseobacterium(1.0000)	f:Weeksellaceae,g:Kaistella (99.2%)	0	0	0	0	0	0	0	0	0	0	0	15.5956	0	0	0	0	0	0	0	0	0	0	0	0	0	0	0	0	0	0	0	0	0	0	0	0	0	0	0	0	0	0	0	0	0	0	0
612	f:Chitinophagaceae(1.0000),g:Ferruginibacter(0.5800)	f:Chitinophagaceae,g:Ferruginibacter (96.4%)	0	0	0	0	0	0	0	0	0	0	0	0	0	0	0	0	0	0	25.9009	0	0	0	0	0	0	0	0	0	0	0	0	0	0	0	0	0	0	0	0	0	0	0	0	0	0	0	0
614	f:Burkholderiaceae(0.3600),g:Burkholderia(0.2600)	f:Sulfuricellaceae,g:Sulfurimicrobium (94.4%)	0	0	0	0	0	0	0	0	0	0	0	0	0	0	0	0	0	0	19.0849	0	0	0	0	0	0	0	0	0	0	0	0	0	0	0	0	0	0	0	0	0	0	0	0	0	0	0	0
619	f:Comamonadaceae(0.5800),g:Acidovorax(0.4600)	f:Sphaerotilaceae,g:Mitsuaria (100%)	0	0	0	0	0	0	0	0	0	0	0	18.7148	0	0	0	0	0	0	0	0	0	0	0	0	0	0	0	0	0	0	0	0	0	0	0	0	0	0	0	0	0	0	0	0	0	0	0
620	f:Paenibacillaceae(1.0000),g:Paenibacillus(1.0000)	f:Paenibacillaceae,g:Paenibacillus (100%)	0	0	0	0	0	0	0	0	0	0	0	21.314	0	0	0	0	0	0	0	0	0	0	0	0	0	0	0	0	0	0	0	0	0	0	0	0	0	0	0	0	0	0	0	0	0	0	0
621	f:Desulfovibrionaceae(0.4700),g:Desulfovibrio(0.4600)	f:Desulfomicrobiaceae,g:Desulfomicrobium (90.837%)	0	0	0	0	0	0	0	0	0	0	0	0	0	0	0	0	0	0	0	0	0	0	29.0464	0	0	0	0	0	0	0	0	0	0	0	0	0	0	0	0	0	0	0	0	0	0	0	0
624	f:Comamonadaceae(0.6500),g:Acidovorax(0.4600)	f:Comamonadaceae,g:Albitalea (99.2%)	0	0	0	0	0	0	0	0	0	0	0	0	0	0	0	0	0	0	30.445	0	0	0	0	0	0	0	0	0	0	0	0	0	0	0	0	0	0	0	0	0	0	0	0	0	0	0	0
627	f:Neisseriaceae(0.2500),g:Chitinimonas(0.1300)	f:Neisseriaceae,g:Crenobacter (92.829%)	0	0	0	0	0	0	0	0	0	0	0	0	0	0	0	0	0	0	26.8097	0	0	0	0	0	0	0	0	0	0	0	0	0	0	0	0	0	0	0	0	0	0	0	0	0	0	0	0
628	f:Hyphomicrobiaceae(0.7800),g:Devosia(0.7300)	f:Devosiaceae,g:Devosia (99.6%)	0	0	0	0	0	0	0	0	0	0	0	0	0	0	0	0	0	0	16.8129	0	0	0	0	0	0	0	0	0	0	0	0	0	0	0	0	0	0	0	0	0	0	0	0	0	0	0	0
629	f:Chitinophagaceae(1.0000),g:Parafilimonas(1.0000)	f:Chitinophagaceae,g:Parafilimonas (98%)	0	0	0	0	0	0	0	0	0	0	0	0	0	0	0	0	0	0	25.9009	0	0	0	0	0	0	0	0	0	0	0	0	0	0	0	0	0	0	0	0	0	0	0	0	0	0	0	0
634	f:Burkholderiaceae(0.4300),g:Azoarcus(0.3400)	f:Burkholderiaceae,g:Paraburkholderia (95.6%)	0	0	0	0	0	0	0	0	0	0	0	0	0	0	0	0	0	0	33.1714	0	0	0	0	0	0	0	0	0	0	0	0	0	0	0	0	0	0	0	0	0	0	0	0	0	0	0	0
635	f:Lysobacteraceae(1.0000),g:Pseudoxanthomonas(1.0000)	f:Xanthomonadaceae,g:Pseudoxanthomonas (100%)	0	0	0	0	0	0	0	0	0	0	0	0	0	0	0	0	0	0	18.1761	0	0	0	0	0	0	0	0	0	0	0	0	0	0	0	0	0	0	0	0	0	0	0	0	0	0	0	0
636	f:Beijerinckiaceae(1.0000),g:Beijerinckia(1.0000)	f:Rhizobiaceae,g:Agrobacterium (100%)	0	0	0	0	0	0	0	0	0	0	0	0	0	0	0	0	0	0	13.6321	0	0	0	0	0	0	0	0	0	0	0	0	0	0	0	0	0	0	0	0	0	0	0	0	0	0	0	0
643	f:Hyphomicrobiaceae(1.0000),g:Hyphomicrobium(1.0000)	f:Hyphomicrobiaceae,g:Hyphomicrobium (99.6%)	0	0	0	0	0	0	0	0	0	0	0	0	0	0	0	0	0	0	20.9025	0	0	0	0	0	0	0	0	0	0	0	0	0	0	0	0	0	0	0	0	0	0	0	0	0	0	0	0
645	f:Nocardiaceae(0.9900),g:Gordonia(0.9900)	f:Gordoniaceae,g:Gordonia (100%)	0	0	0	0	0	0	0	0	0	0	0	21.314	0	0	0	0	0	0	0	0	0	0	0	0	0	0	0	0	0	0	0	0	0	0	0	0	0	0	0	0	0	0	0	0	0	0	0
646	f:Bacillaceae(0.9900),g:Oceanobacillus(0.5200)	f:Bacillaceae,g:Ornithinibacillus (98.4%)	0	0	0	0	0	21.3891	0	0	0	0	0	0	0	0	0	0	0	0	0	0	0	0	0	0	0	0	0	0	0	0	0	0	0	0	0	0	0	0	0	0	0	0	0	0	0	0	0
647	f:Unclassified_Rhizobiales(0.5800),g:Bauldia(0.4300)	f:Kaistiaceae,g:Bauldia (96.414%)	0	0	0	0	0	0	0	0	0	0	0	0	0	0	0	0	0	0	43.1682	0	0	0	0	0	0	0	0	0	0	0	0	0	0	0	0	0	0	0	0	0	0	0	0	0	0	0	0
650	f:Flavobacteriaceae(1.0000),g:Chryseobacterium(1.0000)	f:Weeksellaceae,g:Chryseobacterium (100%)	0	0	0	0	0	0	0	0	0	0	0	27.0324	0	0	0	0	0	0	0	0	0	0	0	0	0	0	0	0	0	0	0	0	0	0	0	0	0	0	0	0	0	0	0	0	0	0	0
661	f:Unclassified_Alphaproteobacteria(0.6700),g:Rhizomicrobium(0.6700)	f:Micropepsaceae,g:Micropepsis (93.625%)	0	0	0	0	0	0	0	0	0	0	0	0	0	0	0	0	0	0	20.4481	0	0	0	0	0	0	0	0	0	0	0	0	0	0	0	0	0	0	0	0	0	0	0	0	0	0	0	0
663	f:Neisseriaceae(0.9700),g:Vitreoscilla(0.5300)	f:Neisseriaceae,g:Vitreoscilla (98.8%)	0	0	0	0	0	14.7687	0	0	0	0	0	0	0	0	0	0	0	0	0	0	0	0	0	0	0	0	0	0	0	0	0	0	0	0	0	0	0	0	0	0	0	0	0	0	0	0	0
672	f:Dietziaceae(0.9900),g:Dietzia(0.9900)	f:Dietziaceae,g:Dietzia (100%)	0	0	0	0	0	18.3335	0	0	0	0	0	0	0	0	0	0	0	0	0	0	0	0	0	0	0	0	0	0	0	0	0	0	0	0	0	0	0	0	0	0	0	0	0	0	0	0	0
673	f:Ectothiorhodospiraceae(0.4300),g:Ectothiorhodospira(0.2400)	f:Ectothiorhodospiraceae,g:Ectothiorhodospira (90%)	0	0	0	0	0	0	0	0	0	0	0	0	0	0	0	0	0	0	19.9937	0	0	0	0	0	0	0	0	0	0	0	0	0	0	0	0	0	0	0	0	0	0	0	0	0	0	0	0
675	f:Nitrososphaeraceae(0.4000),g:Nitrososphaera(0.4000)	f:Nitrosopumilaceae,g:Nitrosarchaeum (98.805%)	0	0	0	0	0	0	0	0	0	0	0	0	0	0	0	0	0	0	19.0849	0	0	0	0	0	0	0	0	0	0	0	0	0	0	0	0	0	0	0	0	0	0	0	0	0	0	0	0
676	f:Rhodobiaceae(0.4200),g:Anderseniella(0.4100)	f:Aestuariivirgaceae,g:Aestuariivirga (96.4%)	0	0	0	0	0	0	0	0	0	0	0	0	0	0	0	0	0	0	21.3569	0	0	0	0	0	0	0	0	0	0	0	0	0	0	0	0	0	0	0	0	0	0	0	0	0	0	0	0
684	f:Anaerolineaceae(0.6600),g:Bellilinea(0.2200)	f:Anaerolineaceae,g:Thermanaerothrix (87.251%)	0	0	0	0	0	0	0	0	0	0	0	0	0	0	0	0	0	0	18.1761	0	0	0	0	0	0	0	0	0	0	0	0	0	0	0	0	0	0	0	0	0	0	0	0	0	0	0	0
687	f:Nocardioidaceae(1.0000),g:Nocardioides(1.0000)	f:Nocardioidaceae,g:Nocardioides (99.6%)	0	0	0	0	0	0	0	0	0	0	0	0	0	0	0	0	0	0	20.9025	0	0	0	0	0	0	0	0	0	0	0	0	0	0	0	0	0	0	0	0	0	0	0	0	0	0	0	0
688	f:Sphaerobacteraceae(0.6100),g:Nitrolancea(0.4500)	f:Sphaerobacteraceae,g:Sphaerobacter (84.585%)	0	0	0	0	0	0	0	0	0	0	0	20.7942	0	0	0	0	0	0	0	0	0	0	0	0	0	0	0	0	0	0	0	0	0	0	0	0	0	0	0	0	0	0	0	0	0	0	0
690	f:Hyphomicrobiaceae(0.3300),g:Rhodoplanes(0.2800)	f:Nitrobacteraceae,g:Bradyrhizobium (95.6%)	0	0	0	0	0	0	0	0	0	0	0	0	0	0	0	0	0	0	19.0849	0	0	0	0	0	0	0	0	0	0	0	0	0	0	0	0	0	0	0	0	0	0	0	0	0	0	0	0
697	f:Rhodocyclaceae(0.4400),g:Azoarcus(0.2900)	f:Zoogloeaceae,g:Thauera (94.8%)	0	0	0	0	0	0	0	0	0	0	0	0	0	0	0	0	0	0	16.3585	0	0	0	0	0	0	0	0	0	0	0	0	0	0	0	0	0	0	0	0	0	0	0	0	0	0	0	0
699	f:Flavobacteriaceae(1.0000),g:Flavobacterium(1.0000)	f:Flavobacteriaceae,g:Flavobacterium (100%)	0	0	0	0	0	0	0	0	0	0	0	0	0	0	0	0	0	0	0	0	0	0	18.5897	0	0	0	0	0	0	0	0	0	0	0	0	0	0	0	0	0	0	0	0	0	0	0	0
700	f:Chitinophagaceae(1.0000),g:Terrimonas(0.8300)	f:Chitinophagaceae,g:Terrimonas (98%)	0	0	0	0	0	0	0	0	0	0	0	0	0	0	0	0	0	0	29.0818	0	0	0	0	0	0	0	0	0	0	0	0	0	0	0	0	0	0	0	0	0	0	0	0	0	0	0	0
701	f:Phyllobacteriaceae(0.5800),g:Mesorhizobium(0.4400)	f:Phyllobacteriaceae,g:Oryzicola (99.2%)	0	0	0	0	0	0	0	0	0	0	0	0	0	0	0	0	0	0	22.2657	0	0	0	0	0	0	0	0	0	0	0	0	0	0	0	0	0	0	0	0	0	0	0	0	0	0	0	0
702	f:Nocardioidaceae(1.0000),g:Aeromicrobium(1.0000)	f:Nocardioidaceae,g:Aeromicrobium (100%)	0	0	0	0	0	0	0	0	0	0	0	0	0	0	0	0	0	0	32.717	0	0	0	0	0	0	0	0	0	0	0	0	0	0	0	0	0	0	0	0	0	0	0	0	0	0	0	0
703	f:Dermabacteraceae(1.0000),g:Dermabacter(0.6300)	f:Dermabacteraceae,g:Dermabacter (100%)	0	0	0	0	0	0	0	0	0	0	0	0	0	0	0	0	0	0	0	0	0	0	0	26.3564	0	0	0	0	0	0	0	0	0	0	0	0	0	0	0	0	0	0	0	0	0	0	0
717	f:Hyphomicrobiaceae(0.8000),g:Devosia(0.7700)	f:Devosiaceae,g:Devosia (99.2%)	0	0	0	0	0	0	0	0	0	0	0	0	0	0	0	0	0	0	19.9937	0	0	0	0	0	0	0	0	0	0	0	0	0	0	0	0	0	0	0	0	0	0	0	0	0	0	0	0
718	f:Bacillaceae(0.9800),g:Bacillus(0.9500)	f:Bacillaceae,g:Caldibacillus (99.6%)	0	0	0	0	0	0	0	0	0	0	0	14.5559	0	0	0	0	0	0	0	0	0	0	0	0	0	0	0	0	0	0	0	0	0	0	0	0	0	0	0	0	0	0	0	0	0	0	0
719	f:Nocardioidaceae(1.0000),g:Nocardioides(1.0000)	f:Nocardioidaceae,g:Nocardioides (100%)	0	0	0	0	0	0	0	0	0	0	0	0	0	0	0	0	0	0	0	0	0	0	18.5897	0	0	0	0	0	0	0	0	0	0	0	0	0	0	0	0	0	0	0	0	0	0	0	0
721	f:Beijerinckiaceae(0.1300),g:Beijerinckia(0.1100)	f:Caulobacteraceae,g:Terricaulis (97.619%)	0	0	0	0	0	0	0	0	0	0	0	0	0	0	0	0	0	0	29.0818	0	0	0	0	0	0	0	0	0	0	0	0	0	0	0	0	0	0	0	0	0	0	0	0	0	0	0	0
722	f:Flavobacteriaceae(1.0000),g:Flavobacterium(1.0000)	f:Flavobacteriaceae,g:Flavobacterium (97.6%)	0	0	0	0	0	0	0	0	0	0	0	0	0	0	0	0	0	0	23.1745	0	0	0	0	0	0	0	0	0	0	0	0	0	0	0	0	0	0	0	0	0	0	0	0	0	0	0	0
725	f:Xanthobacteraceae(0.7900),g:Pseudolabrys(0.7600)	f:Xanthobacteraceae,g:Pseudolabrys (97.2%)	0	0	0	0	0	0	0	0	0	0	0	0	0	0	0	0	0	0	18.6305	0	0	0	0	0	0	0	0	0	0	0	0	0	0	0	0	0	0	0	0	0	0	0	0	0	0	0	0
729	f:Xanthobacteraceae(0.6700),g:Pseudolabrys(0.6300)	f:Xanthobacteraceae,g:Pseudolabrys (96.4%)	0	0	0	0	0	0	0	0	0	0	0	0	0	0	0	0	0	0	24.9921	0	0	0	0	0	0	0	0	0	0	0	0	0	0	0	0	0	0	0	0	0	0	0	0	0	0	0	0
735	f:Phyllobacteriaceae(0.9800),g:Aminobacter(0.9700)	f:Phyllobacteriaceae,g:Aminobacter (100%)	0	0	0	0	0	0	0	0	0	0	0	0	0	0	0	0	0	0	29.5362	0	0	0	0	0	0	0	0	0	0	0	0	0	0	0	0	0	0	0	0	0	0	0	0	0	0	0	0
737	f:Phyllobacteriaceae(0.8000),g:Chelativorans(0.5500)	f:Phyllobacteriaceae,g:Aquibium (98.8%)	0	0	0	0	0	0	0	0	0	0	0	0	0	0	0	0	0	0	18.1761	0	0	0	0	0	0	0	0	0	0	0	0	0	0	0	0	0	0	0	0	0	0	0	0	0	0	0	0
738	f:Hyphomicrobiaceae(0.8200),g:Rhodoplanes(0.7700)	f:Hyphomicrobiaceae,g:Rhodoplanes (96%)	0	0	0	0	0	0	0	0	0	0	0	0	0	0	0	0	0	0	16.3585	0	0	0	0	0	0	0	0	0	0	0	0	0	0	0	0	0	0	0	0	0	0	0	0	0	0	0	0
739	f:Chitinophagaceae(1.0000),g:Ferruginibacter(0.6300)	f:Chitinophagaceae,g:Lacibacter (96%)	0	0	0	0	0	0	0	0	0	0	0	0	0	0	0	0	0	0	16.3585	0	0	0	0	0	0	0	0	0	0	0	0	0	0	0	0	0	0	0	0	0	0	0	0	0	0	0	0
744	f:Bacillaceae(0.9900),g:Bacillus(0.5200)	f:Bacillaceae,g:Pseudogracilibacillus (98.8%)	0	0	0	0	0	0	0	0	0	0	0	18.1949	0	0	0	0	0	0	0	0	0	0	0	0	0	0	0	0	0	0	0	0	0	0	0	0	0	0	0	0	0	0	0	0	0	0	0
746	f:Bacillaceae(1.0000),g:Lysinibacillus(0.7800)	f:Bacillaceae,g:Lysinibacillus (100%)	0	0	0	0	0	0	0	0	0	0	0	0	0	0	0	0	0	0	0	0	0	0	0	18.826	0	0	0	0	0	0	0	0	0	0	0	0	0	0	0	0	0	0	0	0	0	0	0
750	f:Unclassified_Oceanospirillales(0.1700),g:Salicola(0.1700)	f:Ectothiorhodospiraceae,g:Spiribacter (94.8%)	0	0	0	0	0	0	0	0	0	0	0	0	0	0	0	0	0	0	21.3569	0	0	0	0	0	0	0	0	0	0	0	0	0	0	0	0	0	0	0	0	0	0	0	0	0	0	0	0
751	f:Rhodobacteraceae(0.1300),g:Beijerinckia(0.1200)	f:Hyphomonadaceae,g:Candidatus Viadribacter (98%)	0	0	0	0	0	0	0	0	0	0	0	0	0	0	0	0	0	0	14.5409	0	0	0	0	0	0	0	0	0	0	0	0	0	0	0	0	0	0	0	0	0	0	0	0	0	0	0	0
762	f:Phyllobacteriaceae(0.9500),g:Aquamicrobium(0.9200)	f:Phyllobacteriaceae,g:Aquamicrobium (100%)	0	0	0	0	0	0	0	0	0	0	0	17.6751	0	0	0	0	0	0	0	0	0	0	0	0	0	0	0	0	0	0	0	0	0	0	0	0	0	0	0	0	0	0	0	0	0	0	0
767	f:Comamonadaceae(1.0000),g:Ottowia(0.3700)	f:Comamonadaceae,g:Variovorax (100%)	0	0	0	0	0	0	0	0	0	0	0	0	0	0	0	0	0	0	15.4497	0	0	0	0	0	0	0	0	0	0	0	0	0	0	0	0	0	0	0	0	0	0	0	0	0	0	0	0
770	f:Neisseriaceae(0.2300),g:Burkholderia(0.1400)	f:Burkholderiaceae,g:Trinickia (92%)	0	0	0	0	0	0	0	0	0	0	0	0	0	0	0	0	0	0	18.1761	0	0	0	0	0	0	0	0	0	0	0	0	0	0	0	0	0	0	0	0	0	0	0	0	0	0	0	0
772	f:Mycobacteriaceae(1.0000),g:Mycobacterium(1.0000)	f:Mycobacteriaceae,g:Mycobacterium (100%)	0	0	0	0	0	0	0	0	0	0	0	13.5162	0	0	0	0	0	0	0	0	0	0	0	0	0	0	0	0	0	0	0	0	0	0	0	0	0	0	0	0	0	0	0	0	0	0	0
773	f:Chitinophagaceae(1.0000),g:Sediminibacterium(0.8800)	f:Chitinophagaceae,g:Sediminibacterium (98.8%)	0	0	0	0	0	0	0	0	0	0	0	0	0	0	0	0	0	0	17.7217	0	0	0	0	0	0	0	0	0	0	0	0	0	0	0	0	0	0	0	0	0	0	0	0	0	0	0	0
778	f:Cryomorphaceae(1.0000),g:Fluviicola(1.0000)	f:Crocinitomicaceae,g:Fluviicola (100%)	0	0	0	0	0	0	0	0	0	0	0	0	0	0	0	0	0	0	17.7217	0	0	0	0	0	0	0	0	0	0	0	0	0	0	0	0	0	0	0	0	0	0	0	0	0	0	0	0
785	f:Desulfobacteraceae(0.4100),g:Desulfobotulus(0.3500)	f:Archangiaceae,g:Stigmatella (88.095%)	0	0	0	0	0	0	0	0	0	0	0	0	0	0	0	0	0	0	16.8129	0	0	0	0	0	0	0	0	0	0	0	0	0	0	0	0	0	0	0	0	0	0	0	0	0	0	0	0
789	f:Lysobacteraceae(1.0000),g:Pseudoxanthomonas(1.0000)	f:Xanthomonadaceae,g:Pseudoxanthomonas (99.6%)	0	0	0	0	0	0	0	0	0	0	0	0	0	0	0	0	0	0	13.1777	0	0	0	0	0	0	0	0	0	0	0	0	0	0	0	0	0	0	0	0	0	0	0	0	0	0	0	0
793	f:Rhodospirillaceae(0.3700),g:Azospirillum(0.1700)	f:Acetobacteraceae,g:Gluconobacter (88.889%)	0	0	0	0	0	0	0	0	0	0	0	0	0	0	0	0	0	0	0	0	0	0	18.5897	0	0	0	0	0	0	0	0	0	0	0	0	0	0	0	0	0	0	0	0	0	0	0	0
795	f:Xanthobacteraceae(0.7900),g:Pseudolabrys(0.7700)	f:Xanthobacteraceae,g:Pseudolabrys (96.4%)	0	0	0	0	0	0	0	0	0	0	0	0	0	0	0	0	0	0	17.7217	0	0	0	0	0	0	0	0	0	0	0	0	0	0	0	0	0	0	0	0	0	0	0	0	0	0	0	0
796	f:Heliobacteriaceae(0.1100),g:Hydrogenispora(0.1100)	f:Vicinamibacteraceae,g:Vicinamibacter (92.8%)	0	0	0	0	0	0	0	0	0	0	0	0	0	0	0	0	0	0	21.8113	0	0	0	0	0	0	0	0	0	0	0	0	0	0	0	0	0	0	0	0	0	0	0	0	0	0	0	0
797	f:Iamiaceae(0.9200),g:Aquihabitans(0.9000)	f:Iamiaceae,g:Actinomarinicola (93.522%)	0	0	0	0	0	0	0	0	0	0	0	0	0	0	0	0	0	0	14.9953	0	0	0	0	0	0	0	0	0	0	0	0	0	0	0	0	0	0	0	0	0	0	0	0	0	0	0	0
798	f:Vulgatibacteraceae(0.4100),g:Vulgatibacter(0.4100)	f:Anaeromyxobacteraceae,g:Anaeromyxobacter (88.889%)	0	0	0	0	0	0	0	0	0	0	0	17.1552	0	0	0	0	0	0	0	0	0	0	0	0	0	0	0	0	0	0	0	0	0	0	0	0	0	0	0	0	0	0	0	0	0	0	0
799	f:Burkholderiaceae(0.6200),g:Burkholderia(0.5000)	f:Sulfuricellaceae,g:Sulfurimicrobium (94.4%)	0	0	0	0	0	0	0	0	0	0	0	0	0	0	0	0	0	0	19.0849	0	0	0	0	0	0	0	0	0	0	0	0	0	0	0	0	0	0	0	0	0	0	0	0	0	0	0	0
801	f:Unclassified_Elusimicrobia(1.0000),g:Aridibacter(0.7600)	f:Blastocatellaceae,g:Stenotrophobacter (98.8%)	0	0	0	0	0	0	0	0	0	0	0	0	0	0	0	0	0	0	16.3585	0	0	0	0	0	0	0	0	0	0	0	0	0	0	0	0	0	0	0	0	0	0	0	0	0	0	0	0
813	f:Leuconostocaceae(0.9100),g:Weissella(0.9100)	f:Lactobacillaceae,g:Weissella (97.2%)	24.5218	15.7132	19.4444	0	14.6935	0	0	0	0	0	0	0	0	0	0	0	0	0	0	0	0	0	0	0	0	0	0	0	0	0	0	0	0	0	0	0	0	0	0	0	0	0	0	0	0	0	0
816	f:Bacillaceae(0.4200),g:Geomicrobium(0.2900)	f:Paenibacillaceae,g:Paenibacillus (94.8%)	0	0	0	0	0	0	0	0	0	0	0	23.3934	0	0	0	0	0	0	0	0	0	0	0	0	0	0	0	0	0	0	0	0	0	0	0	0	0	0	0	0	0	0	0	0	0	0	0
821	f:Bacillaceae(0.9900),g:Oceanobacillus(0.7300)	f:Bacillaceae,g:Paraliobacillus (95.2%)	0	0	0	0	0	15.7872	0	0	0	0	0	0	0	0	0	0	0	0	0	0	0	0	0	0	0	0	0	0	0	0	0	0	0	0	0	0	0	0	0	0	0	0	0	0	0	0	0
822	f:Bacillaceae(0.9700),g:Oceanobacillus(0.4100)	f:Bacillaceae,g:Lentibacillus (97.61%)	0	0	0	0	0	13.2409	0	0	0	0	0	0	0	0	0	0	0	0	0	0	0	0	0	0	0	0	0	0	0	0	0	0	0	0	0	0	0	0	0	0	0	0	0	0	0	0	0
832	f:Eubacteriaceae(0.5500),g:Eubacterium(0.5500)	f:Eubacteriales Family XIII. Incertae Sedis,g:Ihubacter (98.4%)	0	0	0	0	0	0	0	0	0	0	0	0	0	0	0	0	0	0	0	0	0	0	15.685	0	0	0	0	0	0	0	0	0	0	0	0	0	0	0	0	0	0	0	0	0	0	0	0
835	f:Unclassified_Spartobacteria(0.8100),g:Limisphaera(0.8100)	f:Fontisphaeraceae,g:Fontisphaera (91.6%)	0	0	0	0	0	0	0	0	0	0	0	0	0	0	0	0	0	0	20.9025	0	0	0	0	0	0	0	0	0	0	0	0	0	0	0	0	0	0	0	0	0	0	0	0	0	0	0	0
837	f:Hyphomicrobiaceae(0.9600),g:Hyphomicrobium(0.7600)	f:Hyphomicrobiaceae,g:Hyphomicrobium (96%)	0	0	0	0	0	0	0	0	0	0	0	0	0	0	0	0	0	0	14.5409	0	0	0	0	0	0	0	0	0	0	0	0	0	0	0	0	0	0	0	0	0	0	0	0	0	0	0	0
839	f:Unclassified_Alphaproteobacteria(0.5800),g:Rhizomicrobium(0.5800)	f:Micropepsaceae,g:Micropepsis (92.49%)	0	0	0	0	0	0	0	0	0	0	0	0	0	0	0	0	0	0	15.9041	0	0	0	0	0	0	0	0	0	0	0	0	0	0	0	0	0	0	0	0	0	0	0	0	0	0	0	0
841	f:Chitinophagaceae(1.0000),g:Parafilimonas(1.0000)	f:Chitinophagaceae,g:Parafilimonas (98%)	0	0	0	0	0	0	0	0	0	0	0	0	0	0	0	0	0	0	13.1777	0	0	0	0	0	0	0	0	0	0	0	0	0	0	0	0	0	0	0	0	0	0	0	0	0	0	0	0
842	f:Alcaligenaceae(0.9900),g:Castellaniella(0.2900)	f:Alcaligenaceae,g:Pusillimonas (97.6%)	0	0	0	0	0	0	0	0	0	0	0	15.5956	0	0	0	0	0	0	0	0	0	0	0	0	0	0	0	0	0	0	0	0	0	0	0	0	0	0	0	0	0	0	0	0	0	0	0
849	f:Ignavibacteriaceae(0.3000),g:Ignavibacterium(0.3000)	f:Ignavibacteriaceae,g:Ignavibacterium (82.869%)	0	0	0	0	0	0	0	0	0	0	0	0	0	0	0	0	0	0	16.3585	0	0	0	0	0	0	0	0	0	0	0	0	0	0	0	0	0	0	0	0	0	0	0	0	0	0	0	0
859	f:Actinomycetaceae(1.0000),g:Actinomyces(1.0000)	f:Actinomycetaceae,g:Actinomyces (100%)	0	0	0	0	0	0	0	0	0	0	0	0	0	0	0	0	0	0	0	0	0	0	0	14.4333	0	0	0	0	0	0	0	0	0	0	0	0	0	0	0	0	0	0	0	0	0	0	0
868	f:Phyllobacteriaceae(0.9400),g:Nitratireductor(0.4000)	f:Phyllobacteriaceae,g:Nitratireductor (100%)	0	0	0	0	0	0	0	0	0	0	0	20.2743	0	0	0	0	0	0	0	0	0	0	0	0	0	0	0	0	0	0	0	0	0	0	0	0	0	0	0	0	0	0	0	0	0	0	0
870	f:Xanthobacteraceae(0.7200),g:Pseudolabrys(0.6900)	f:Xanthobacteraceae,g:Pseudolabrys (96.4%)	0	0	0	0	0	0	0	0	0	0	0	0	0	0	0	0	0	0	14.5409	0	0	0	0	0	0	0	0	0	0	0	0	0	0	0	0	0	0	0	0	0	0	0	0	0	0	0	0
873	f:Hyphomicrobiaceae(1.0000),g:Hyphomicrobium(0.9900)	f:Hyphomicrobiaceae,g:Hyphomicrobium (98.4%)	0	0	0	0	0	0	0	0	0	0	0	0	0	0	0	0	0	0	13.1777	0	0	0	0	0	0	0	0	0	0	0	0	0	0	0	0	0	0	0	0	0	0	0	0	0	0	0	0
878	f:Conexibacteraceae(0.7400),g:Conexibacter(0.7400)	f:Solirubrobacteraceae,g:Solirubrobacter (94%)	0	0	0	0	0	0	0	0	0	0	0	0	0	0	0	0	0	0	0	0	0	0	0	15.6884	0	0	0	0	0	0	0	0	0	0	0	0	0	0	0	0	0	0	0	0	0	0	0
879	f:Unclassified_Clostridiales(0.9300),g:Tissierella(0.8200)	f:Tissierellaceae,g:Tissierella (97.6%)	0	0	0	0	0	0	0	0	0	0	0	16.1155	0	0	0	0	0	0	0	0	0	0	0	0	0	0	0	0	0	0	0	0	0	0	0	0	0	0	0	0	0	0	0	0	0	0	0
884	f:Rhodospirillaceae(0.9600),g:Dongia(0.9000)	f:Rhodospirillaceae,g:Dongia (95.6%)	0	0	0	0	0	0	0	0	0	0	0	0	0	0	0	0	0	0	14.9953	0	0	0	0	0	0	0	0	0	0	0	0	0	0	0	0	0	0	0	0	0	0	0	0	0	0	0	0
886	f:Rhizobiaceae(0.5500),g:Ensifer(0.5500)	f:Phyllobacteriaceae,g:Mesorhizobium (98.8%)	0	0	0	0	0	0	0	0	0	0	0	0	0	0	0	0	0	0	24.0833	0	0	0	0	0	0	0	0	0	0	0	0	0	0	0	0	0	0	0	0	0	0	0	0	0	0	0	0
888	f:Gemmatimonadaceae(0.2900),g:Gemmatimonas(0.2900)	f:Gemmatimonadaceae,g:Gemmatimonas (88.095%)	0	0	0	0	0	0	0	0	0	0	0	0	0	0	0	0	0	0	15.4497	0	0	0	0	0	0	0	0	0	0	0	0	0	0	0	0	0	0	0	0	0	0	0	0	0	0	0	0
897	f:Enterococcaceae(0.7500),g:Enterococcus(0.7400)	f:Enterococcaceae,g:Enterococcus (98.4%)	0	0	0	0	0	0	0	0	0	0	0	0	0	0	0	0	0	0	0	0	0	0	0	21.9637	22.6465	0	0	0	0	0	31.8669	0	0	0	0	25.2492	0	13.0397	0	0	0	0	0	0	0	0	0
899	f:Erythrobacteraceae(1.0000),g:Altererythrobacter(1.0000)	f:Erythrobacteraceae,g:Tsuneonella (100%)	0	0	0	0	0	0	0	0	0	0	0	0	0	0	0	0	0	0	0	0	0	0	0	13.1782	0	0	0	0	0	0	0	0	0	0	0	0	0	0	0	0	0	0	0	0	0	0	0
900	f:Caldilineaceae(0.9900),g:Litorilinea(0.7000)	f:Caldilineaceae,g:Litorilinea (92.4%)	0	0	0	0	0	0	0	0	0	0	0	0	0	0	0	0	0	0	23.6289	0	0	0	0	0	0	0	0	0	0	0	0	0	0	0	0	0	0	0	0	0	0	0	0	0	0	0	0
901	f:Caldilineaceae(0.2700),g:Litorilinea(0.1600)	f:Sinobacteraceae,g:Sinimarinibacterium (81.301%)	0	0	0	0	0	0	0	0	0	0	0	0	0	0	0	0	0	0	0	0	0	0	13.9423	0	0	0	0	0	0	0	0	0	0	0	0	0	0	0	0	0	0	0	0	0	0	0	0
912	f:Sphaerobacteraceae(0.7800),g:Nitrolancea(0.6200)	f:Sphaerobacteraceae,g:Sphaerobacter (85.375%)	0	0	0	0	0	0	0	0	0	0	0	14.5559	0	0	0	0	0	0	0	0	0	0	0	0	0	0	0	0	0	0	0	0	0	0	0	0	0	0	0	0	0	0	0	0	0	0	0
921	f:Phyllobacteriaceae(0.7700),g:Mesorhizobium(0.7700)	f:Phyllobacteriaceae,g:Mesorhizobium (99.2%)	0	0	0	0	0	0	0	0	0	0	0	0	0	0	0	0	0	0	13.1777	0	0	0	0	0	0	0	0	0	0	0	0	0	0	0	0	0	0	0	0	0	0	0	0	0	0	0	0
923	f:Rhodanobacteraceae(1.0000),g:Dyella(0.9800)	f:Rhodanobacteraceae,g:Dyella (99.2%)	0	0	0	0	0	0	0	0	0	0	0	0	0	0	0	0	0	0	18.6305	0	0	0	0	0	0	0	0	0	0	0	0	0	0	0	0	0	0	0	0	0	0	0	0	0	0	0	0
925	f:Saprospiraceae(0.5300),g:Lewinella(0.4200)	f:Lewinellaceae,g:Neolewinella (88.889%)	0	0	0	0	0	0	0	0	0	0	0	0	0	0	0	0	0	0	14.0865	0	0	0	0	0	0	0	0	0	0	0	0	0	0	0	0	0	0	0	0	0	0	0	0	0	0	0	0
935	f:Chitinophagaceae(1.0000),g:Terrimonas(0.4900)	f:Chitinophagaceae,g:Agriterribacter (98.8%)	0	0	0	0	0	0	0	0	0	0	0	0	0	0	0	0	0	0	14.9953	0	0	0	0	0	0	0	0	0	0	0	0	0	0	0	0	0	0	0	0	0	0	0	0	0	0	0	0
937	f:Comamonadaceae(0.5200),g:Acidovorax(0.3500)	f:,g: Rhizobacter (99.6%)	0	0	0	0	0	0	0	0	0	0	0	0	0	0	0	0	0	0	15.9041	0	0	0	0	0	0	0	0	0	0	0	0	0	0	0	0	0	0	0	0	0	0	0	0	0	0	0	0
943	f:Bacillaceae(0.9400),g:Oceanobacillus(0.6300)	f:Bacillaceae,g:Oceanobacillus (95.2%)	0	0	0	0	0	13.2409	0	0	0	0	0	0	0	0	0	0	0	0	0	0	0	0	0	0	0	0	0	0	0	0	0	0	0	0	0	0	0	0	0	0	0	0	0	0	0	0	0
947	f:Desulfovibrionaceae(0.2600),g:Desulfovibrio(0.2600)	f:Vicinamibacteraceae,g:Vicinamibacter (94.4%)	0	0	0	0	0	0	0	0	0	0	0	0	0	0	0	0	0	0	20.4481	0	0	0	0	0	0	0	0	0	0	0	0	0	0	0	0	0	0	0	0	0	0	0	0	0	0	0	0
951	f:Sphingomonadaceae(1.0000),g:Sphingomonas(0.9900)	f:Sphingomonadaceae,g:Sphingomonas (99.6%)	0	0	0	0	0	0	0	0	0	0	0	0	0	0	0	0	0	0	24.5377	0	0	0	0	0	0	0	0	0	0	0	0	0	0	0	0	0	0	0	0	0	0	0	0	0	0	0	0
955	f:Rhodobacteraceae(0.9800),g:Paracoccus(0.7000)	f:Paracoccaceae,g:Paracoccus (99.2%)	0	0	0	0	0	0	0	0	0	0	0	15.5956	0	0	0	0	0	0	0	0	0	0	0	0	0	0	0	0	0	0	0	0	0	0	0	0	0	0	0	0	0	0	0	0	0	0	0
957	f:Sphingomonadaceae(1.0000),g:Sphingobium(1.0000)	f:Sphingomonadaceae,g:Sphingobium (100%)	0	0	0	0	0	0	0	0	0	0	0	0	0	0	0	0	0	0	14.9953	0	0	0	0	0	0	0	0	0	0	0	0	0	0	0	0	0	0	0	0	0	0	0	0	0	0	0	0
968	f:Cytophagaceae(0.2200),g:Pontibacter(0.1000)	f:Prolixibacteraceae,g:Puteibacter (88.4%)	0	0	0	0	0	0	0	0	0	0	0	0	0	0	0	0	0	0	16.3585	0	0	0	0	0	0	0	0	0	0	0	0	0	0	0	0	0	0	0	0	0	0	0	0	0	0	0	0
973	f:Flavobacteriaceae(1.0000),g:Myroides(0.5700)	f:Flavobacteriaceae,g:Myroides (99.2%)	0	0	0	0	0	0	0	0	0	0	0	14.5559	0	0	0	0	0	0	0	0	0	0	0	0	0	0	0	0	0	0	0	0	0	0	0	0	0	0	0	0	0	0	0	0	0	0	0
977	f:Chitinophagaceae(1.0000),g:Taibaiella(1.0000)	f:Chitinophagaceae,g:Taibaiella (100%)	0	0	0	0	0	0	0	0	0	0	0	0	0	0	0	0	0	0	14.9953	0	0	0	0	0	0	0	0	0	0	0	0	0	0	0	0	0	0	0	0	0	0	0	0	0	0	0	0
978	f:Aurantimonadaceae(0.7500),g:Martelella(0.7000)	f:Rhizobiaceae,g:Rhizobium (100%)	0	0	0	0	0	0	0	0	0	0	0	0	0	0	0	0	0	0	29.0818	0	0	0	0	0	0	0	0	0	0	0	0	0	0	0	0	0	0	0	0	0	0	0	0	0	0	0	0
979	f:Beijerinckiaceae(0.2800),g:Labrys(0.2000)	f:Methylocystaceae,g:Methylosinus (93.6%)	0	0	0	0	0	0	0	0	0	0	0	0	0	0	0	0	0	0	16.8129	0	0	0	0	0	0	0	0	0	0	0	0	0	0	0	0	0	0	0	0	0	0	0	0	0	0	0	0
981	f:Sphingomonadaceae(0.8100),g:Novosphingobium(0.7800)	f:Erythrobacteraceae,g:Caenibius (98.8%)	0	0	0	0	0	0	0	0	0	0	0	0	0	0	0	0	0	0	16.3585	0	0	0	0	0	0	0	0	0	0	0	0	0	0	0	0	0	0	0	0	0	0	0	0	0	0	0	0
982	f:Rhodobacteraceae(0.5200),g:Aquamicrobium(0.3300)	f:Phyllobacteriaceae,g:Nitratireductor (98.8%)	0	0	0	0	0	0	0	0	0	0	0	13.5162	0	0	0	0	0	0	0	0	0	0	0	0	0	0	0	0	0	0	0	0	0	0	0	0	0	0	0	0	0	0	0	0	0	0	0
983	f:Flavobacteriaceae(1.0000),g:Flavobacterium(1.0000)	f:Flavobacteriaceae,g:Flavobacterium (100%)	0	0	0	0	0	0	0	0	0	0	0	0	0	0	0	0	0	0	13.1777	0	0	0	0	0	0	0	0	0	0	0	0	0	0	0	0	0	0	0	0	0	0	0	0	0	0	0	0
984	f:Dietziaceae(0.9900),g:Dietzia(0.9900)	f:Dietziaceae,g:Dietzia (99.6%)	0	0	0	0	0	0	0	0	0	0	0	13.5162	0	0	0	0	0	0	0	0	0	0	0	0	0	0	0	0	0	0	0	0	0	0	0	0	0	0	0	0	0	0	0	0	0	0	0
989	f:Cellulomonadaceae(0.8700),g:Actinotalea(0.8700)	f:Cellulomonadaceae,g:Actinotalea (97.189%)	0	0	0	0	0	0	0	0	0	0	0	13.5162	0	0	0	0	0	0	0	0	0	0	0	0	0	0	0	0	0	0	0	0	0	0	0	0	0	0	0	0	0	0	0	0	0	0	0
991	f:Xanthobacteraceae(0.4700),g:Pseudolabrys(0.4000)	f:Xanthobacteraceae,g:Pseudolabrys (96.8%)	0	0	0	0	0	0	0	0	0	0	0	0	0	0	0	0	0	0	29.0818	0	0	0	0	0	0	0	0	0	0	0	0	0	0	0	0	0	0	0	0	0	0	0	0	0	0	0	0
993	f:Rhodobacteraceae(0.9900),g:Paracoccus(0.6700)	f:Paracoccaceae,g:Pararhodobacter (99.6%)	0	0	0	0	0	0	0	0	0	0	0	0	0	0	0	0	0	0	29.5362	0	0	0	0	0	0	0	0	0	0	0	0	0	0	0	0	0	0	0	0	0	0	0	0	0	0	0	0
996	f:Rhodobiaceae(0.7900),g:Parvibaculum(0.7900)	f:Parvibaculaceae,g:Parvibaculum (96%)	0	0	0	0	0	0	0	0	0	0	0	0	0	0	0	0	0	0	14.9953	0	0	0	0	0	0	0	0	0	0	0	0	0	0	0	0	0	0	0	0	0	0	0	0	0	0	0	0
998	f:Coxiellaceae(0.3200),g:Aquicella(0.1900)	f:Oceanospirillaceae,g:Marinobacterium (90%)	0	0	0	0	0	0	0	0	0	0	0	0	0	0	0	0	0	0	17.2673	0	0	0	0	0	0	0	0	0	0	0	0	0	0	0	0	0	0	0	0	0	0	0	0	0	0	0	0
1004	f:Parachlamydiaceae(0.7500),g:Parachlamydia(0.7500)	f:Parachlamydiaceae,g:Candidatus Protochlamydia (88.845%)	0	0	0	0	0	0	0	0	0	0	0	0	0	0	0	0	0	0	14.0865	0	0	0	0	0	0	0	0	0	0	0	0	0	0	0	0	0	0	0	0	0	0	0	0	0	0	0	0
1013	f:Unclassified_Elusimicrobia(1.0000),g:Aridibacter(0.7500)	f:Blastocatellaceae,g:Stenotrophobacter (98%)	0	0	0	0	0	0	0	0	0	0	0	0	0	0	0	0	0	0	13.1777	0	0	0	0	0	0	0	0	0	0	0	0	0	0	0	0	0	0	0	0	0	0	0	0	0	0	0	0
1022	f:Acetobacteraceae(0.9900),g:Acetobacter(0.9900)	f:Acetobacteraceae,g:Acetobacter (94.422%)	0	0	0	0	0	0	0	0	0	0	0	0	0	0	0	0	0	0	0	0	0	0	0	0	0	0	0	0	0	0	0	0	0	0	0	0	0	0	0	0	0	0	0	0	0	0	0
1028	f:Hyphomonadaceae(0.4400),g:Hirschia(0.3600)	f:Hyphomonadaceae,g:Asprobacter (98.8%)	0	0	0	0	0	0	0	0	0	0	0	0	0	0	0	0	0	0	20.4481	0	0	0	0	0	0	0	0	0	0	0	0	0	0	0	0	0	0	0	0	0	0	0	0	0	0	0	0
1053	f:Unclassified_Burkholderiales(0.5600),g:Aquabacterium(0.3000)	f:Sphaerotilaceae,g:Rubrivivax (98.8%)	0	0	0	0	0	0	0	0	0	0	0	0	0	0	0	0	0	0	22.2657	0	0	0	0	0	0	0	0	0	0	0	0	0	0	0	0	0	0	0	0	0	0	0	0	0	0	0	0
1077	f:Bacillaceae(0.9000),g:Oceanobacillus(0.3000)	f:Bacillaceae,g:Virgibacillus (98.8%)	0	0	0	0	0	0	0	0	0	0	0	23.3934	0	0	0	0	0	0	0	0	0	0	0	0	0	0	0	0	0	0	0	0	0	0	0	0	0	0	0	0	0	0	0	0	0	0	0
1090	f:Cytophagaceae(1.0000),g:Dyadobacter(1.0000)	f:Spirosomaceae,g:Dyadobacter (100%)	0	0	0	0	0	0	0	0	0	0	0	0	0	0	0	0	0	0	15.9041	0	0	0	0	0	0	0	0	0	0	0	0	0	0	0	0	0	0	0	0	0	0	0	0	0	0	0	0
1095	f:Hyphomicrobiaceae(0.3800),g:Devosia(0.3200)	f:,g:Nordella (96.8%)	0	0	0	0	0	0	0	0	0	0	0	0	0	0	0	0	0	0	14.9953	0	0	0	0	0	0	0	0	0	0	0	0	0	0	0	0	0	0	0	0	0	0	0	0	0	0	0	0
1100	f:Rhizobiaceae(0.8800),g:Rhizobium(0.8800)	f:Rhizobiaceae,g:Rhizobium (99.6%)	0	0	0	0	0	0	0	0	0	0	0	0	0	0	0	0	0	0	13.1777	0	0	0	0	0	0	0	0	0	0	0	0	0	0	0	0	0	0	0	0	0	0	0	0	0	0	0	0
1101	f:Comamonadaceae(0.7700),g:Acidovorax(0.5200)	f:Comamonadaceae,g:Aquabacterium (99.2%)	0	0	0	0	0	0	0	0	0	0	0	0	0	0	0	0	0	0	15.4497	0	0	0	0	0	0	0	0	0	0	0	0	0	0	0	0	0	0	0	0	0	0	0	0	0	0	0	0
1130	f:Lysobacteraceae(1.0000),g:Luteimonas(0.8600)	f:Xanthomonadaceae,g:Lysobacter (99.2%)	0	0	0	0	0	0	0	0	0	0	0	0	0	0	0	0	0	0	14.5409	0	0	0	0	0	0	0	0	0	0	0	0	0	0	0	0	0	0	0	0	0	0	0	0	0	0	0	0
1135	f:Methanomassiliicoccaceae(0.4900),g:Methanomassiliicoccus(0.4900)	f:Methanomassiliicoccaceae,g:Methanomassiliicoccus (81.176%)	0	0	0	0	0	0	0	0	0	0	0	0	0	0	0	0	0	0	14.9953	0	0	0	0	0	0	0	0	0	0	0	0	0	0	0	0	0	0	0	0	0	0	0	0	0	0	0	0
1148	f:Leuconostocaceae(1.0000),g:Leuconostoc(1.0000)	f:Lactobacillaceae,g:Leuconostoc (97.6%)	0	0	0	0	0	25.4632	16.3797	28.235	18.1182	15.4498	19.8146	0	0	0	0	0	0	0	0	0	0	0	0	0	0	0	0	0	0	0	0	0	0	0	0	0	0	0	0	0	0	0	0	0	0	0	0
1158	f:Lysobacteraceae(1.0000),g:Thermomonas(0.7100)	f:Xanthomonadaceae,g:Thermomonas (98.8%)	0	0	0	0	0	0	0	0	0	0	0	0	0	0	0	0	0	0	15.4497	0	0	0	0	0	0	0	0	0	0	0	0	0	0	0	0	0	0	0	0	0	0	0	0	0	0	0	0
1174	f:Hyphomicrobiaceae(0.4200),g:Rhodoplanes(0.4100)	f:Nitrobacteriaceae,g:Pseudorhodoplanes (96.8%)	0	0	0	0	0	0	0	0	0	0	0	0	0	0	0	0	0	0	33.1714	0	0	0	0	0	0	0	0	0	0	0	0	0	0	0	0	0	0	0	0	0	0	0	0	0	0	0	0
1212	f:Microbacteriaceae(0.9900),g:Canibacter(0.4500)	f:Microbacteriaceae,g:Pseudoclavibacter (98.4%)	0	0	0	0	0	0	0	0	0	0	0	18.7148	0	0	0	0	0	0	0	0	0	0	0	0	0	0	0	0	0	0	0	0	0	0	0	0	0	0	0	0	0	0	0	0	0	0	0
1213	f:Rhizobiaceae(0.8800),g:Ensifer(0.8800)	f:Rhizobiaceae,g:Sinorhizobium (99.6%)	0	0	0	0	0	0	0	0	0	0	0	0	0	0	0	0	0	0	14.5409	0	0	0	0	0	0	0	0	0	0	0	0	0	0	0	0	0	0	0	0	0	0	0	0	0	0	0	0
1218	f:Caulobacteraceae(1.0000),g:Phenylobacterium(0.6300)	f:Caulobacteraceae,g:Phenylobacterium (99.6%)	0	0	0	0	0	0	0	0	0	0	0	0	0	0	0	0	0	0	18.6305	0	0	0	0	0	0	0	0	0	0	0	0	0	0	0	0	0	0	0	0	0	0	0	0	0	0	0	0
1235	f:Veillonellaceae(0.1900),g:Desulfotomaculum(0.0700)	f:Vicinamibacteraceae,g:Vicinamibacter (90%)	0	0	0	0	0	0	0	0	0	0	0	0	0	0	0	0	0	0	18.1761	0	0	0	0	0	0	0	0	0	0	0	0	0	0	0	0	0	0	0	0	0	0	0	0	0	0	0	0
1262	f:Hyphomicrobiaceae(1.0000),g:Hyphomicrobium(0.9400)	f:Hyphomicrobiaceae,g:Hyphomicrobium (98.4%)	0	0	0	0	0	0	0	0	0	0	0	0	0	0	0	0	0	0	16.3585	0	0	0	0	0	0	0	0	0	0	0	0	0	0	0	0	0	0	0	0	0	0	0	0	0	0	0	0
1290	f:Hyphomicrobiaceae(0.9800),g:Hyphomicrobium(0.8600)	f:Hyphomicrobiaceae,g:Hyphomicrobium (99.2%)	0	0	0	0	0	0	0	0	0	0	0	0	0	0	0	0	0	0	20.9025	0	0	0	0	0	0	0	0	0	0	0	0	0	0	0	0	0	0	0	0	0	0	0	0	0	0	0	0
1301	f:Ectothiorhodospiraceae(0.1800),g:Acidiferrobacter(0.1000)	f:Thioprofundaceae,g:Thioprofundum (93.6%)	0	0	0	0	0	0	0	0	0	0	0	0	0	0	0	0	0	0	22.2657	0	0	0	0	0	0	0	0	0	0	0	0	0	0	0	0	0	0	0	0	0	0	0	0	0	0	0	0
1304	f:Unclassified_Alphaproteobacteria(0.6000),g:Rhizomicrobium(0.6000)	f:Rhodospirillaceae,g:Aliidongia (90%)	0	0	0	0	0	0	0	0	0	0	0	0	0	0	0	0	0	0	13.1777	0	0	0	0	0	0	0	0	0	0	0	0	0	0	0	0	0	0	0	0	0	0	0	0	0	0	0	0
1317	f:Flavobacteriaceae(1.0000),g:Flavobacterium(1.0000)	f:Flavobacteriaceae,g:Flavobacterium (100%)	0	0	0	0	0	0	0	0	0	0	0	0	0	0	0	0	0	0	14.0865	0	0	0	0	0	0	0	0	0	0	0	0	0	0	0	0	0	0	0	0	0	0	0	0	0	0	0	0
1342	f:Lysobacteraceae(1.0000),g:Wohlfahrtiimonas(1.0000)	f:Ignatzschineriaceae,g:Wohlfahrtiimonas (100%)	0	0	0	0	0	0	0	0	0	0	0	0	0	0	0	0	0	0	0	0	0	0	0	13.1782	0	0	0	0	0	0	0	0	0	0	0	0	0	0	0	0	0	0	0	0	0	0	0
1350	f:Enterococcaceae(0.6500),g:Enterococcus(0.6200)	f:Enterococcaceae,g:Enterococcus (96%)	0	0	0	0	0	0	0	0	0	0	0	0	0	0	0	0	0	0	0	0	0	0	0	0	0	0	0	0	0	0	0	0	0	0	0	0	0	0	0	0	0	0	0	0	0	0	0
1373	f:Sphingobacteriaceae(1.0000),g:Sphingobacterium(0.9900)	f:Sphingobacteriaceae,g:Sphingobacterium (95.6%)	0	0	0	0	0	0	0	0	0	0	0	14.0361	0	0	0	0	0	0	0	0	0	0	0	0	0	0	0	0	0	0	0	0	0	0	0	0	0	0	0	0	0	0	0	0	0	0	0
1379	f:Anaerolineaceae(0.2800),g:Bellilinea(0.1100)	f:Aggregatilineaceae,g:Aggregatilinea (86.4%)	0	0	0	0	0	0	0	0	0	0	0	0	0	0	0	0	0	0	13.6321	0	0	0	0	0	0	0	0	0	0	0	0	0	0	0	0	0	0	0	0	0	0	0	0	0	0	0	0
1Identification according to the Silva v1.23 database.
2Taxonomic assignment scores for family (f:) and genus (g:) are provided between brackets. In general, taxonomic assignments are considered reliable when bootstrap confidence values exceed 0.80 (displayed in bold).
3% identiy score for genus (g) is provided between brackets.
[truncated: 68 more columns]
