# Supplementary material for: Bacterial biota composition in gut regions of black soldier fly larvae reared on industrial residual streams: revealing community dynamics along its intestinal tract
Source: Front Microbiol. 2023 Dec 1;14:1276187. doi: 10.3389/fmicb.2023.1276187 (PMC10722301; doi:10.3389/fmicb.2023.1276187)
Supplement: Supplementary file 6 [file Table_4.XLSX]

## Sheet: Blad1
Table S4: Mean diversity indices and standard deviation calculated from the 16S rRNA gene sequencing data. (n = 5, unless stated otherwise)
Sampling day	Substrate	Sampled material	Mean observed richness	Mean Chao1 index	Mean Shannon index	Standard deviation observed richness	Standard deviation Chao1 index	Standard deviation Shannon index
4	Chicken feed	20 whole larvae	137.6	174.083	1.3839	25.3831	25.1129	0.473887
		Fresh substrate1	385	470	3.88404	N.D.	N.D.	N.D.
	Swill	20 whole larvae	160.8	188.602	1.20166	69.0304	79.874	0.482876
		Fresh substrate	356	412.609	3.17522	14.1951	17.7415	0.0835718
	DDGS	20 whole larvae	193.8	233.007	2.08594	31.6101	33.9064	0.248843
		Fresh substrate4	417.75	436.039	3.96218	24.8646	22.7976	0.276783
at harvest	Chicken feed	10 whole larvae	230.2	236.961	3.44103	173.484	181.285	1.03754
		Anterior midgut	111	133.144	2.71652	6.40312	16.7676	0.28203
		Middle midgut	105	119.118	2.70372	15.1822	23.8448	0.234415
		Posterior midgut	74.8	91.4152	1.00043	18.7936	31.9391	0.177633
		Hindgut	77.4	106.689	1.93271	19.6545	34.7718	0.1933
		Residue	93.6	106.657	2.89056	18.7163	24.7797	0.276506
	Swill	10 whole larvae	110	110.907	2.65419	12.6491	12.4771	0.419362
		Anterior midgut	307	342.47	3.0475	15.7003	19.8521	0.289264
		Middle midgut	349	387.369	3.15215	45.0555	48.6212	0.49982
		Posterior midgut	211.2	266.448	1.79934	31.9953	40.9335	0.44825
		Hindgut	95.5	115.392	1.33672	49.7237	62.5869	0.591317
		Residue	86.4	104.937	2.14257	17.1697	20.3039	0.131181
	DDGS	10 whole larvae3	147	152.222	3.00609	37.3363	39.3068	0.203018
		Anterior midgut	83.6	104.503	2.02115	18.8892	32.2207	0.163573
		Middle midgut	134.6	161.55	2.13166	30.6154	35.2717	0.285179
		Posterior midgut	175	204.189	1.98312	45.9619	39.474	0.364535
		Hindgut	80.2	99.0015	1.83008	11.3004	16.1191	0.208972
		Residue	53.2	57.17	2.47328	7.39594	10.402	0.16583
1 Value obtained from one sample
3 Value obtained from 3 samples
4 Value obtained from 4 samples
N.D. Not determined
