# Supplementary material for: Bacterial biota composition in gut regions of black soldier fly larvae reared on industrial residual streams: revealing community dynamics along its intestinal tract
Source: Front Microbiol. 2023 Dec 1;14:1276187. doi: 10.3389/fmicb.2023.1276187 (PMC10722301; doi:10.3389/fmicb.2023.1276187)
Supplement: Supplementary file 7 [file Table_5.XLSX]

## Sheet: Sheet1
Table S5: Results PERMANOVA analysis for all NMDS plots
Figure 4: NMDS plot of bacterial communities substrate, larvae at D4, larvae at harvest and residue
Permanova using the adonis2 function
Number of permutations: 9999
Factor	DF	SumOfSqs	R2	F	Pr(>F)	Significance
Sample	3	2.9169	0.1489	3.5664	0.0001	***
Diet	2	1.4943	0.07628	2.7405	0.0001	***
Sample:Diet	6	3.7279	0.1903	2.2789	0.0001	***
Residual	42	11.4506	0.58452
Total	53	19.5898	1
Supplementary Figure S1: NMDS plot of bacterial communities larvae at D4 and at harvest
Permanova using the adonis2 function
Number of permutations: 9999
Factor	DF	SumOfSqs	R2	F	Pr(>F)	Significance
Sample	1	0.633	0.07036	2.5401	0.013	*
Diet	2	1.1672	0.12973	2.3417	0.0042	**
Sample:Diet	2	1.4648	0.16281	2.9388	0.0009	***
Residual	23	5.7319	0.6371
Total	28	8.9969	1
Supplementary Figure S2: NMDS plot of bacterial communities substrate and residue
Permanova using the adonis2 function
Number of permutations: 9999
Factor	DF	SumOfSqs	R2	F	Pr(>F)	Significance
Sample	1	1.3357	0.15166	8.1747	0.0001	***
Diet	2	2.5386	0.28824	7.7684	0.0001	***
Sample:Diet	2	1.8285	0.20761	5.5954	0.0001	***
Residual	19	3.1045	0.35249
Total	24	8.8073	1
Figure 6: NMDS plot of bacterial communities different gut regions
Permanova using the adonis2 function
Number of permutations: 9999
Factor	DF	SumOfSqs	R2	F	Pr(>F)	Significance
Gut.region	3	5.2126	0.25291	15.1353	0.0001	***
Diet	2	5.4249	0.26321	23.6277	0.0001	***
Gut.region:Diet	6	4.4623	0.21651	6.4784	0.0001	***
Residual	48	5.5104	0.26736
Total	59	20.6102	1
