# Supplementary material for: Bacterial biota composition in gut regions of black soldier fly larvae reared on industrial residual streams: revealing community dynamics along its intestinal tract
Source: Front Microbiol. 2023 Dec 1;14:1276187. doi: 10.3389/fmicb.2023.1276187 (PMC10722301; doi:10.3389/fmicb.2023.1276187)
Supplement: Supplementary file 8 [file Table_6.XLSX]

## Sheet: Sheet1
Table S6: Shared distinctive zOTUs for each diet in each gut region as determined by LEfSe, DESeq2 and EdgeR
	Gut region
Diet	Anterior midgut	Middle midgut	Posterior midgut	Hindgut
Chicken feed	15	14	3	6
DDGS	8	16	9	3
Swill	27	32	9	1
